# Supplementary material
Source: PubMed Central journal article supplement (PMC2791897)
Supplement: NIHMS98994-supplement-1.pdf [file NIHMS98994-supplement-1.pdf]

| Gene Name | EntrezGene | Description                                                                            | Chromosome | Start (bp) | End (bp)  |
|-----------|------------|----------------------------------------------------------------------------------------|------------|------------|-----------|
| ADIPOQ    | 9370       | Adiponectin, C1Q and collagen domain containing                                        | 3          | 188043156  | 188058946 |
| APCS      | 325        | Amyloid P component, serum                                                             | 1          | 157824239  | 157825162 |
| ATF3      | 467        | Activating transcription factor 3                                                      | 1          | 210848616  | 210860740 |
| C3        | 718        | Complement component 3                                                                 | 19         | 6628850    | 6671630   |
| CCL2      | 6347       | Chemokine (C-C motif) ligand 2                                                         | 17         | 29606416   | 29607957  |
| CCR2      | 1231       | Chemokine (C-C motif) receptor 2                                                       | 3          | 652254     | 655694    |
| CD36      | 948        | CD36 molecule (thrombospondin receptor)                                                | 7          | 80123408   | 80129000  |
| CEBPD     | 1052       | CCAAT/enhancer binding protein (C/EBP), delta                                          | 8          | 48812804   | 48813241  |
| CHUK      | 1147       | Conserved helix-loop-helix ubiquitous kinase                                           | 10         | 101938114  | 101979311 |
| CPB2      | 1361       | Carboxypeptidase B2 (plasma)                                                           | 13         | 45524983   | 45573483  |
| EGR1      | 1958       | Early growth response 1                                                                | 5          | 137829079  | 137832903 |
| F2R       | 2149       | Coagulation factor II (thrombin) receptor                                              | 5          | 76047506   | 76067054  |
| F2RL1     | 2150       | Coagulation factor II (thrombin) receptor-like 1                                       | 5          | 76150609   | 76167319  |
| F2RL2     | 2151       | Coagulation factor II (thrombin) receptor-like 2                                       | 5          | 75947062   | 75954996  |
| F2RL3     | 9002       | Coagulation factor II (thrombin) receptor-like 3                                       | 19         | 16860825   | 16870516  |
| FGL2      | 10875      | Fibrinogen-like 2                                                                      | 7          | 76660623   | 76667086  |
| HMOX1     | 3162       | Heme oxygenase (decycling) 1                                                           | 22         | 34107101   | 34113133  |
| HNF1A     | 6927       | HNF1 homeobox A                                                                        | 12         | 119909932  | 119924695 |
| HNF4A     | 3172       | Hepatocyte nuclear factor 4, alpha                                                     | 20         | 42463337   | 42493444  |
| ICAM1     | 3383       | Intercellular adhesion molecule 1 (CD54), human rhinovirus receptor                    | 19         | 10242764   | 10258291  |
| IFNG      | 3458       | Interferon, gamma                                                                      | 12         | 66834815   | 66839790  |
| IKBKB     | 3551       | Inhibitor of kappa light polypeptide gene enhancer in B-cells, kinase beta             | 8          | 42247986   | 42309122  |
| IKBKE     | 9641       | Inhibitor of kappa light polypeptide gene enhancer in B-cells, kinase epsilon          | 1          | 204710418  | 204736845 |
| IL10      | 3586       | Interleukin 10                                                                         | 1          | 205007577  | 205012462 |
| IL13      | 3596       | Interleukin 13                                                                         | 5          | 132021763  | 132023923 |
| IL18      | 3606       | Interleukin 18 (interferon-gamma-inducing factor)                                      | 11         | 111519185  | 111540050 |
| IL1R1     | 3554       | Interleukin 1 receptor, type I                                                         | 2          | 33241123   | 33243308  |
| IL1RN     | 3557       | Interleukin 1 receptor antagonist                                                      | 2          | 113573407  | 113608061 |
| IL4       | 3565       | Interleukin 4                                                                          | 5          | 132037271  | 132046267 |
| IL4R      | 3566       | Interleukin 4 receptor                                                                 | 16         | 27232751   | 27283600  |
| IL6R      | 3570       | Interleukin 6 receptor                                                                 | 1          | 152644293  | 152706812 |
| IL6ST     | 3572       | Interleukin 6 signal transducer (gp130, oncostatin M receptor)                         | 5          | 55270324   | 55326410  |
| IL8       | 3576       | Interleukin 8                                                                          | 4          | 74825138   | 74828297  |
| IRAK4     | 51135      | Interleukin-1 receptor-associated kinase 4                                             | 12         | 42448170   | 42468166  |
| JUN       | 3725       | Jun oncogene                                                                           | 1          | 59019050   | 59022373  |
| KLF2      | 10365      | Kruppel-like factor 2 (lung)                                                           | 19         | 16296636   | 16299685  |
| MIF       | 4282       | Macrophage migration inhibitory factor (glycosylation-inhibiting factor)               | 22         | 22566596   | 22567390  |
| MMP3      | 4314       | Matrix metalloproteinase 3 (stromelysin 1, progelatinase)                              | 11         | 102211746  | 102219548 |
| MMP9      | 4318       | Matrix metalloproteinase 9 (gelatinase B, 92kDa gelatinase, 92kDa type IV collagenase) | 20         | 44070953   | 44078607  |
| NFKB1     | 4790       | Nuclear factor of kappa light polypeptide gene enhancer in B-cells 1 (p105)            | 4          | 103641518  | 103757506 |
| NFKB2     | 4791       | Nuclear factor of kappa light polypeptide gene enhancer in B-cells 2 (p49/p100)        | 10         | 104144343  | 104152271 |
| NFKBIA    | 4792       | Nuclear factor of kappa light polypeptide gene enhancer in B-cells inhibitor, alpha    | 14         | 34942298   | 34943690  |

|                 |        |                                                                                                                                 |    |           |           |
|-----------------|--------|---------------------------------------------------------------------------------------------------------------------------------|----|-----------|-----------|
| <b>NFKBIB</b>   | 4793   | Nuclear factor of kappa light polypeptide gene enhancer in B-cells inhibitor, beta                                              | 19 | 44082454  | 44091374  |
| <b>NFKBIE</b>   | 4794   | Nuclear factor of kappa light polypeptide gene enhancer in B-cells inhibitor, epsilon                                           | 6  | 44333880  | 44341503  |
| <b>NR3C1</b>    | 2908   | Nuclear receptor subfamily 3, group C, member 1 (glucocorticoid receptor)                                                       | 5  | 142637688 | 142795270 |
| <b>PARP1</b>    | 142    | Poly (ADP-ribose) polymerase family, member 1                                                                                   | 1  | 224615014 | 224662389 |
| <b>PIAS3</b>    | 10401  | Protein inhibitor of activated STAT, 3                                                                                          | 1  | 144287388 | 144297903 |
| <b>PLAUR</b>    | 5329   | Plasminogen activator, urokinase receptor                                                                                       | 19 | 48844590  | 48864248  |
| <b>PLCB2</b>    | 5330   | Phospholipase C, beta 2                                                                                                         | 15 | 38367389  | 38387466  |
| <b>PLCB3</b>    | 5331   | Phospholipase C, beta 3 (phosphatidylinositol-specific)                                                                         | 11 | 63775570  | 63791969  |
| <b>PNPT1</b>    | 87178  | Polyribonucleotide nucleotidyltransferase 1                                                                                     | 2  | 55715955  | 55774463  |
| <b>PPARA</b>    | 5465   | Peroxisome proliferator-activated receptor alpha                                                                                | 22 | 44945894  | 45018317  |
| <b>PPARG</b>    | 5468   | Peroxisome proliferator-activated receptor gamma                                                                                | 3  | 12423345  | 12425917  |
| <b>PRKCD</b>    | 5580   | Protein kinase C, delta                                                                                                         | 3  | 53170262  | 53201773  |
| <b>PTGS2</b>    | 5743   | Prostaglandin-endoperoxide synthase 2 (prostaglandin G/H synthase and cyclooxygenase)                                           | 1  | 184907591 | 184916179 |
| <b>REL</b>      | 5966   | V-rel reticuloendotheliosis viral oncogene homolog (avian)                                                                      | 2  | 60962255  | 61003682  |
| <b>RELA</b>     | 5970   | V-rel reticuloendotheliosis viral oncogene homolog A, nuclear factor of kappa light polypeptide gene enhancer in B-cells 3, p65 | 11 | 65177647  | 65186942  |
| <b>RIPK1</b>    | 8737   | Receptor (TNFRSF)-interacting serine-threonine kinase 1                                                                         | 6  | 3009211   | 3060418   |
| <b>SAA1</b>     | 6288   | Serum amyloid A1                                                                                                                | 11 | 18244386  | 18248085  |
| <b>SAA2</b>     | 6289   | Serum amyloid A2                                                                                                                | 11 | 18217164  | 18226758  |
| <b>SELE</b>     | 6401   | Selectin E (endothelial adhesion molecule 1)                                                                                    | 1  | 167958405 | 167969827 |
| <b>SELL</b>     | 6402   | Selectin L (lymphocyte adhesion molecule 1)                                                                                     | 1  | 167926435 | 167947378 |
| <b>SELP</b>     | 6403   | Selectin P (granule membrane protein 140kDa, antigen CD62)                                                                      | 1  | 167824713 | 167866031 |
| <b>SELPLG</b>   | 6404   | Selectin P ligand                                                                                                               | 12 | 107539495 | 107551799 |
| <b>SELS</b>     | 55829  | Selenoprotein S                                                                                                                 | 15 | 99628736  | 99635223  |
| <b>SERPINE1</b> | 5054   | Serpin peptidase inhibitor, clade E (nexin, plasminogen activator inhibitor type 1), member 1                                   | 1  | 17743041  | 17746559  |
| <b>SOCS3</b>    | 9021   | Suppressor of cytokine signaling 3                                                                                              | 17 | 73864453  | 73867753  |
| <b>SOD1</b>     | 6647   | Superoxide dismutase 1, soluble (amyotrophic lateral sclerosis 1 (adult))                                                       | 21 | 31953884  | 31961512  |
| <b>SOD2</b>     | 6648   | Superoxide dismutase 2, mitochondrial                                                                                           | 6  | 160039770 | 160042424 |
| <b>SP1</b>      | 6667   | Sp1 transcription factor                                                                                                        | 12 | 52091802  | 52092449  |
| <b>STAT3</b>    | 6774   | Signal transducer and activator of transcription 3 (acute-phase response factor)                                                | 17 | 37718868  | 37794039  |
| <b>TERT</b>     | 7015   | Telomerase reverse transcriptase                                                                                                | 5  | 1306281   | 1348162   |
| <b>TIRAP</b>    | 114609 | Toll-interleukin 1 receptor (TIR) domain containing adaptor protein                                                             | 11 | 125658191 | 125670038 |
| <b>TLR1</b>     | 7096   | Toll-like receptor 1                                                                                                            | 4  | 38474270  | 38474954  |
| <b>TLR10</b>    | 81793  | Toll-like receptor 10                                                                                                           | 4  | 38450628  | 38460984  |
| <b>TLR2</b>     | 7097   | Toll-like receptor 2                                                                                                            | 4  | 154842101 | 154846301 |
| <b>TLR3</b>     | 7098   | Toll-like receptor 3                                                                                                            | 4  | 187227303 | 187243244 |
| <b>TLR4</b>     | 7099   | Toll-like receptor 4                                                                                                            | 9  | 119506430 | 119519589 |
| <b>TLR6</b>     | 10333  | Toll-like receptor 6                                                                                                            | 4  | 38504618  | 38507555  |
| <b>TLR9</b>     | 54106  | Toll-like receptor 9                                                                                                            | 3  | 52230137  | 52235219  |
| <b>TNFAIP3</b>  | 7128   | Tumor necrosis factor, alpha-induced protein 3                                                                                  | 6  | 138230421 | 138246144 |
| <b>TNFRSF1A</b> | 7132   | Tumor necrosis factor receptor superfamily, member 1A                                                                           | 12 | 6308183   | 6321522   |
| <b>TNFRSF1B</b> | 7133   | Tumor necrosis factor receptor superfamily, member 1B                                                                           | 1  | 12149648  | 12191864  |
| <b>TOLLIP</b>   | 54472  | Toll interacting protein                                                                                                        | 11 | 1252177   | 1280549   |
| <b>TRAF2</b>    | 7186   | TNF receptor-associated factor 2                                                                                                | 9  | 138912984 | 138943494 |
| <b>TRAF6</b>    | 7189   | TNF receptor-associated factor 6                                                                                                | 11 | 36467298  | 36488398  |
| <b>VCAM1</b>    | 7412   | Vascular cell adhesion molecule 1                                                                                               | 1  | 100973316 | 100977183 |
