# Supplementary material
Source: PubMed Central journal article supplement (PMC2791897)
Supplement: NIHMS98994-supplement-2.pdf [file NIHMS98994-supplement-2.pdf]

| SNP        | gene     | location      | CHR | BP        | SNP association with longev(L-6) in CHS European-Americans |         |            |             |          | SNP association with longevity case-control status in CHS European-Americans |                  |                     |             |          |            |            |             |        |        |        |
|------------|----------|---------------|-----|-----------|------------------------------------------------------------|---------|------------|-------------|----------|------------------------------------------------------------------------------|------------------|---------------------|-------------|----------|------------|------------|-------------|--------|--------|--------|
|            |          |               |     |           | BETA                                                       | S.E.    | Log5% U95% | T-Statistic | P-value  | FDR q-value                                                                  | case allele freq | control allele freq | Chi-squared | P-value  | Odds ratio | Log5% U95% | FDR q-value |        |        |        |
| rs17863856 | TNFRSF1B | intron        | 1   | 12155393  | 0.01411                                                    | 0.01413 | -0.01938   | 0.04181     | 0.89986  | 0.318                                                                        | 0.875            | 0.2935              | 0.3048      | 0.2989   | 0.5846     | 0.9477     | 0.7818      | 1.149  | 0.8895 |        |
| rs17879694 | TNFRSF1B | intron        | 1   | 12155648  | 0.02037                                                    | 0.02581 | -0.03022   | 0.07096     | 0.7891   | 0.4301                                                                       | 0.8766           | 0.05721             | 0.05805     | 0.006382 | 0.9364     | 0.9847     | 0.6747      | 1.437  | 0.9749 |        |
| rs17886166 | TNFRSF1B | intron        | 1   | 12156341  | -0.02236                                                   | 0.01393 | -0.04965   | 0.004943    | -1.605   | 0.1036                                                                       | 0.6679           | 0.3242              | 0.3091      | 0.5213   | 0.4703     | 1.072      | 0.8874      | 1.295  | 0.889  |        |
| rs17881405 | TNFRSF1B | intron        | 1   | 12164578  | -0.007849                                                  | 0.01617 | -0.03955   | 0.02385     | -0.4853  | 0.6275                                                                       | 0.9344           | 0.2294              | 0.2111      | 0.9769   | 0.323      | 1.113      | 0.9003      | 1.375  | 0.889  |        |
| rs17885329 | TNFRSF1B | intron        | 1   | 12171090  | 0.03917                                                    | 0.01754 | 0.004796   | 0.07355     | 2.233    | 0.02558                                                                      | 0.4149           | 0.1729              | 0.1628      | 0.3628   | 0.547      | 1.075      | 0.8498      | 1.359  | 0.8966 |        |
| rs17883437 | TNFRSF1B | coding        | 1   | 12175542  | 0.03163                                                    | 0.01504 | 0.002161   | 0.0611      | 2.104    | 0.03547                                                                      | 0.4572           | 0.2388              | 0.25        | 0.3355   | 0.5625     | 0.9412     | 0.7666      | 1.156  | 0.8995 |        |
| rs17883167 | TNFRSF1B | intron        | 1   | 12184832  | 0.03943                                                    | 0.01623 | 0.006331   | 0.07024     | 2.369    | 0.0179                                                                       | 0.3581           | 0.2007              | 0.1968      | 0.8238   | 1.025      | 0.8225     | 1.278       | 0.9727 |        |        |
| rs17884213 | TNFRSF1B | intron        | 1   | 12186132  | 0.02761                                                    | 0.01448 | -0.00138   | 0.05661     | 1.866    | 0.06207                                                                      | 0.5814           | 0.2612              | 0.2654      | 0.04589  | 0.8304     | 0.9784     | 0.8011      | 1.195  | 0.9127 |        |
| rs1061624  | TNFRSF1B | 3UTR          | 1   | 12189852  | -0.008054                                                  | 0.01231 | -0.03218   | 0.01607     | -0.6543  | 0.5129                                                                       | 0.9107           | 0.4271              | 0.4584      | 1.951    | 0.1625     | 0.881      | 0.7374      | 1.052  | 0.8251 |        |
| rs4647001  | JUN      | flanking_5UTR | 1   | 59023006  | 0.01077                                                    | 0.01331 | -0.01531   | 0.03685     | 0.8091   | 0.4185                                                                       | 0.8766           | 0.3504              | 0.3746      | 1.254    | 0.2628     | 0.9004     | 0.7493      | 1.082  | 0.8667 |        |
| rs2760501  | JUN      | flanking_5UTR | 1   | 59023685  | 0.02439                                                    | 0.02541 | -0.0254    | 0.07418     | 0.9601   | 0.3371                                                                       | 0.875            | 0.06983             | 0.07396     | 1.262    | 0.7224     | 0.9399     | 0.6677      | 1.323  | 0.943  |        |
| rs1409419  | VCAM1    | flanking_5UTR | 1   | 100955984 | 0.007704                                                   | 0.01287 | -0.01752   | 0.03293     | 0.5985   | 0.5495                                                                       | 0.9197           | 0.5137              | 0.5         | 0.3716   | 0.5422     | 1.056      | 0.8858      | 1.26   | 0.8966 |        |
| rs3176860  | VCAM1    | intron        | 1   | 100959807 | -0.003448                                                  | 0.0132  | -0.02932   | 0.02242     | -0.2612  | 0.7939                                                                       | 0.9579           | 0.3831              | 0.4082      | 1.303    | 0.2556     | 0.9003     | 0.7518      | 1.078  | 0.8667 |        |
| rs3176861  | VCAM1    | intron        | 1   | 100959909 | -0.005382                                                  | 0.01556 | -0.03589   | 0.02512     | -0.3458  | 0.7939                                                                       | 0.953            | 0.194               | 0.223       | 2.493    | 0.1144     | 0.8388     | 0.6743      | 1.044  | 0.8251 |        |
| rs3176862  | VCAM1    | intron        | 1   | 100961998 | -0.009337                                                  | 0.02219 | -0.05283   | 0.03415     | -0.4208  | 0.6739                                                                       | 0.9344           | 0.08475             | 0.08475     | 0.7446   | 0.3882     | 1.144      | 0.8428      | 1.553  | 0.889  |        |
| rs2392221  | VCAM1    | intron        | 1   | 100962761 | -0.007332                                                  | 0.01791 | -0.04243   | 0.02777     | -0.4094  | 0.6823                                                                       | 0.9344           | 0.1617              | 0.1541      | 0.2172   | 0.6412     | 1.059      | 0.8323      | 1.347  | 0.9278 |        |
| rs3176867  | VCAM1    | intron        | 1   | 100966793 | -0.005284                                                  | 0.01478 | -0.03426   | 0.02369     | -0.3574  | 0.7208                                                                       | 0.9471           | 0.2351              | 0.26        | 1.646    | 0.1995     | 0.8745     | 0.7125      | 1.073  | 0.8347 |        |
| rs3181088  | VCAM1    | intron        | 1   | 100971296 | 0.008544                                                   | 0.01645 | -0.0237    | 0.04079     | 0.5193   | 0.6036                                                                       | 0.9344           | 0.2065              | 0.1829      | 1.782    | 0.1819     | 1.163      | 0.9318      | 1.451  | 0.8251 |        |
| rs3170716  | VCAM1    | intron        | 1   | 100973735 | 0.002636                                                   | 0.01977 | -0.03612   | 0.04139     | 0.1333   | 0.8939                                                                       | 0.9617           | 0.1468              | 0.1281      | 1.48     | 0.2237     | 1.171      | 0.908       | 1.51   | 0.8447 |        |
| rs3176877  | VCAM1    | intron        | 1   | 100975983 | -0.004053                                                  | 0.01346 | -0.03043   | 0.02232     | -0.3012  | 0.7633                                                                       | 0.9578           | 0.3719              | 0.3511      | 0.9337   | 0.3339     | 1.094      | 0.9114      | 1.314  | 0.889  |        |
| rs3176878  | VCAM1    | coding        | 1   | 100976286 | 0.002891                                                   | 0.01715 | -0.03073   | 0.03651     | 0.1685   | 0.8662                                                                       | 0.959            | 0.1667              | 0.1641      | 0.02376  | 0.8775     | 1.019      | 0.8041      | 1.291  | 0.9747 |        |
| rs10910829 | PIAS3    | flanking_3UTR | 1   | 144298137 | 0.01064                                                    | 0.01377 | -0.01634   | 0.03762     | 0.7728   | 0.4397                                                                       | 0.8766           | 0.342               | 0.3197      | 1.121    | 0.2896     | 1.067      | 0.9178      | 1.333  | 0.8667 |        |
| rs2004659  | PIAS3    | flanking_3UTR | 1   | 144298541 | -0.01986                                                   | 0.01354 | -0.04641   | 0.006682    | -1.467   | 0.1426                                                                       | 0.7203           | 0.3396              | 0.3744      | 2.617    | 0.1057     | 0.859      | 0.7145      | 1.033  | 0.8251 |        |
| rs6427641  | IL6R     | intron        | 1   | 152647110 | 0.03179                                                    | 0.01291 | 0.006483   | 0.0571      | 2.462    | 0.01386                                                                      | 0.3502           | 0.4552              | 0.4714      | 0.4714   | 0.4923     | 1.064      | 0.8915      | 1.27   | 0.8947 |        |
| rs1396821  | IL6R     | intron        | 1   | 152648673 | 0.0464                                                     | 0.01664 | -0.01379   | 0.07901     | 2.789    | 0.005313                                                                     | 0.2304           | 0.1721              | 0.2042      | 3.292    | 0.06963    | 0.8102     | 0.6452      | 1.017  | 0.8251 |        |
| rs4075015  | IL6R     | intron        | 1   | 152655620 | -0.02387                                                   | 0.01309 | -0.04952   | 0.001776    | -1.824   | 0.06819                                                                      | 0.5914           | 0.4142              | 0.4222      | 0.1308   | 0.7176     | 0.9676     | 0.8095      | 1.157  | 0.943  |        |
| rs4505185  | IL6R     | intron        | 1   | 152675779 | -0.06374                                                   | 0.0128  | -0.1088    | -0.05865    | -6.541   | 6.91E-11                                                                     | 1.65E-08         | 0.4229              | 0.4183      | 0.1019   | 0.8373     | 1.019      | 0.8526      | 1.218  | 0.9727 |        |
| rs4537545  | IL6R     | intron        | 1   | 152689503 | 0.115                                                      | 0.01282 | 0.08992    | 0.1402      | 8.975    | 4.27E-19                                                                     | 2.04E-16         | 0.4117              | 0.4314      | 0.7923   | 0.7442     | 0.9222     | 0.7716      | 1.102  | 0.889  |        |
| rs4329505  | IL6R     | intron        | 1   | 152690044 | -0.02983                                                   | 0.01739 | -0.06391   | 0.004257    | -1.715   | 0.08639                                                                      | 0.6537           | 0.1704              | 0.1559      | 0.7742   | 0.3789     | 1.112      | 0.8774      | 1.41   | 0.889  |        |
| rs4072391  | IL6R     | 3UTR          | 1   | 152705504 | -0.0766                                                    | 0.01642 | -0.1088    | -0.0444     | -4.663   | 3.21E-06                                                                     | 0.0050109        | 0.1928              | 0.188       | 0.07452  | 0.7849     | 1.032      | 0.8248      | 1.29   | 0.9618 |        |
| rs10494327 | APCS     | flanking_5UTR | 1   | 157823075 | -0.00989                                                   | 0.01989 | -0.04897   | 0.02899     | -0.5023  | 0.6155                                                                       | 0.9344           | 0.1157              | 0.124       | 0.327    | 0.5674     | 0.9237     | 0.7038      | 1.212  | 0.8995 |        |
| rs1446963  | APCS     | flanking_3UTR | 1   | 157826155 | -0.00687                                                   | 0.01824 | -0.04326   | 0.02889     | -0.3766  | 0.7055                                                                       | 0.9461           | 0.1468              | 0.1487      | 0.9848   | 0.9039     | 0.9248     | 0.7685      | 1.262  | 0.9747 |        |
| rs1900393  | APCS     | flanking_3UTR | 1   | 157826586 | 0.10078                                                    | 0.01599 | -0.02056   | 0.04212     | 0.6743   | 0.5002                                                                       | 0.9107           | 0.2201              | 0.186       | 3.639    | 0.05645    | 1.236      | 0.994       | 1.536  | 0.8251 |        |
| rs3917854  | SELP     | intron        | 1   | 167825659 | -0.001264                                                  | 0.01407 | -0.02883   | 0.0263      | -0.08984 | 0.8284                                                                       | 0.9667           | 0.3184              | 0.3029      | 0.556    | 0.4559     | 1.075      | 0.889       | 1.3    | 0.889  |        |
| rs3917836  | SELP     | intron        | 1   | 167827898 | -0.05164                                                   | 0.02228 | -0.09853   | -0.00797    | -2.318   | 0.02052                                                                      | 0.3764           | 0.08333             | 0.006       | 0.3159   | 0.8531     | 0.6252     | 1.164       | 0.8833 |        |        |
| rs6128     | SELP     | coding        | 1   | 167829528 | -0.007785                                                  | 0.01811 | -0.04326   | 0.02769     | -0.4301  | 0.6671                                                                       | 0.1418           | 0.9344              | 0.143       | 0.2256   | 0.6348     | 1.062      | 0.9278      | 1.362  | 0.943  |        |
| rs6136     | SELP     | coding        | 1   | 167830575 | 0.02198                                                    | 0.02098 | -0.01913   | 0.0631      | 1.048    | 0.2948                                                                       | 0.8692           | 0.1085              | 0.1133      | 0.114    | 0.7356     | 0.9527     | 0.7193      | 1.262  | 0.9432 |        |
| rs1566471  | SELP     | intron        | 1   | 167830754 | -0.02973                                                   | 0.01615 | -0.06139   | 0.001923    | -1.841   | 0.06571                                                                      | 0.589            | 0.1903              | 0.2096      | 1.141    | 0.2854     | 0.8865     | 0.7107      | 1.106  | 0.8667 |        |
| rs6133     | SELP     | coding        | 1   | 167831970 | 0.000448                                                   | 0.02111 | -0.04093   | 0.04182     | 0.02124  | 0.9831                                                                       | 0.9883           | 0.1022              | 0.1055      | 0.05788  | 0.8099     | 0.9651     | 0.7229      | 1.289  | 0.9727 |        |
| rs2205896  | SELP     | intron        | 1   | 167832189 | 0.02886                                                    | 0.01297 | 0.003445   | 0.05428     | 2.226    | 0.0261                                                                       | 0.4149           | 0.4264              | 0.4345      | 0.132    | 0.7164     | 0.9676     | 0.8099      | 1.156  | 0.943  |        |
| rs3917750  | SELP     | intron        | 1   | 167843377 | -0.0114                                                    | 0.01364 | -0.03813   | 0.01534     | -0.8353  | 0.4036                                                                       | 0.875            | 0.3566              | 0.329       | 1.689    | 0.1937     | 1.131      | 0.9395      | 1.361  | 0.8251 |        |
| rs2142760  | SELP     | intron        | 1   | 167843957 | -0.03064                                                   | 0.01287 | -0.05586   | -0.005424   | -2.382   | 0.01729                                                                      | 0.3581           | 0.4689              | 0.4607      | 0.1341   | 0.7142     | 1.033      | 0.8664      | 1.233  | 0.943  |        |
| rs3917744  | SELP     | intron        | 1   | 167844614 | 0.01838                                                    | 0.01373 | -0.00854   | 0.04529     | 1.338    | 0.1809                                                                       | 0.7365           | 0.3495              | 0.3421      | 0.1216   | 0.7274     | 1.033      | 0.8859      | 1.243  | 0.943  |        |
| rs2076074  | SELP     | intron        | 1   | 167845210 | -0.01305                                                   | 0.01549 | -0.04341   | 0.01731     | -0.8425  | 0.3995                                                                       | 0.875            | 0.2388              | 0.2629      | 0.3986   | 0.5278     | 1.069      | 0.8666      | 1.316  | 0.8947 |        |
| rs3917740  | SELP     | intron        | 1   | 167845890 | -0.01307                                                   | 0.01619 | -0.04481   | 0.01867     | -0.8069  | 0.4198                                                                       | 0.8766           | 0.204               | 0.1941      | 0.1941   | 0.3025     | 0.5823     | 1.064       | 0.8537 | 1.325  | 0.8995 |
| rs3917739  | SELP     | intron        | 1   | 167846002 | 0.01373                                                    | 0.01341 | -0.01255   | 0.04002     | 1.024    | 0.3059                                                                       | 0.875            | 0.3221              | 0.3683      | 4.638    | 0.03127    | 0.8152     | 0.6769      | 0.9819 | 0.8251 |        |
| rs2236305  | SELP     | intron        | 1   | 167846269 | -0.008282                                                  | 0.01295 | -0.03386   | 0.01709     | -0.6397  | 0.5224                                                                       | 0.9107           | 0.454               | 0.4345      | 0.7627   | 0.3825     | 1.082      | 0.9065      | 1.292  | 0.889  |        |
| rs3917759  | SELP     | intron        | 1   | 167847754 | -0.01622                                                   | 0.01193 | -0.05405   | 0.02161     | -0.8406  | 0.4006                                                                       | 0.875            | 0.143               | 0.1464      | 0.04476  | 1.127      | 0.2885     | 1.106       | 0.918  | 1.333  |        |
| rs3917727  | SELP     | intron        | 1   | 167847882 | 0.004127                                                   | 0.0137  | -0.02272   | 0.03097     | 0.3014   | 0.7631                                                                       | 0.9578           | 0.4829              | 0.3205      | 0.3205   | 0.2885     | 1.106      | 0.918       | 1.333  | 0.8667 |        |
| rs2236868  | SELP     | intron        | 1   | 167850020 | -0.001407                                                  | 0.01129 | -0.02668   | 0.02387     | -0.1091  | 0.9131                                                                       | 0.9667           | 0.4826              | 0.4614      | 0.8926   | 0.3448     | 1.089      | 0.9127      | 1.298  | 0.889  |        |
| rs3917808  | SELP     | intron        | 1   |           |                                                            |         |            |             |          |                                                                              |                  |                     |             |          |            |            |             |        |        |        |

|            |       |               |   |           |           |         |           |           |          |          |         |         |         |          |          |        |        |        |        |
|------------|-------|---------------|---|-----------|-----------|---------|-----------|-----------|----------|----------|---------|---------|---------|----------|----------|--------|--------|--------|--------|
| rs2205849  | SELL  | intron        | 1 | 167942917 | -0.02085  | 0.01443 | -0.04936  | 0.007649  | -1.434   | 0.1517   | 0.7349  | 0.2674  | 0.2666  | 0.001829 | 0.9659   | 1.004  | 0.8233 | 1.225  | 0.9862 |
| rs3177980  | SELL  | coding        | 1 | 167943110 | -0.01696  | 0.01443 | -0.04525  | 0.01133   | -1.175   | 0.2401   | 0.8007  | 0.2898  | 0.2573  | 2.659    | 0.1029   | 1.078  | 0.9674 | 1.434  | 0.8251 |
| rs3917438  | SELL  | intron        | 1 | 167960474 | -0.08698  | 0.02932 | -0.1441   | -0.02911  | -2.952   | 0.003171 | 0.2238  | 0.06359 | 0.04931 | 1.954    | 0.1622   | 1.309  | 0.8964 | 1.913  | 0.8251 |
| rs5368     | SELL  | coding        | 1 | 167963570 | 0.03347   | 0.02227 | -0.01019  | 0.07713   | 1.502    | 0.1331   | 0.7105  | 0.08582 | 0.09091 | 0.1566   | 0.6905   | 0.9388 | 0.6879 | 1.281  | 0.9417 |
| rs3917423  | SELL  | intron        | 1 | 167964626 | 0.02601   | 0.01863 | -0.0105   | 0.06252   | 1.396    | 0.1627   | 0.7365  | 0.1331  | 0.1404  | 0.2257   | 0.6347   | 0.9396 | 0.7268 | 1.215  | 0.9278 |
| rs1534904  | SELL  | intron        | 1 | 167965449 | -0.01246  | 0.01397 | -0.03984  | 0.01491   | -0.8923  | 0.3723   | 0.875   | 0.3085  | 0.3085  | 0.003629 | 0.952    | 0.9942 | 0.8218 | 1.203  | 0.9765 |
| rs2076059  | SELL  | intron        | 1 | 167965545 | 0.00796   | 0.01312 | -0.02376  | 0.02768   | -0.4793  | 0.8813   | 0.9617  | 0.4266  | 0.3929  | 2.339    | 0.1262   | 1.15   | 0.9615 | 1.375  | 0.8251 |
| rs5361     | SELL  | coding        | 1 | 167967684 | -0.007723 | 0.02071 | -0.04832  | 0.03287   | -0.3728  | 0.7093   | 0.9461  | 0.1107  | 0.1271  | 1.26     | 0.2616   | 0.8547 | 0.6497 | 1.124  | 0.8667 |
| rs5353     | SELL  | intron        | 1 | 167969598 | 0.01229   | 0.01464 | -0.0164   | 0.04098   | 0.8398   | 0.4011   | 0.875   | 0.2594  | 0.2904  | 2.385    | 0.1225   | 0.8555 | 0.7016 | 1.043  | 0.8251 |
| rs2206593  | PTGS2 | 3UTR          | 1 | 184909052 | 0.04635   | 0.02499 | -0.00262  | 0.09532   | 1.855    | 0.06366  | 0.584   | 0.06841 | 0.0742  | 0.1213   | 0.7276   | 0.9405 | 0.6661 | 1.328  | 0.943  |
| rs275      | PTGS2 | 3UTR          | 1 | 184909681 | -0.005667 | 0.01375 | -0.03262  | 0.02129   | -0.4121  | 0.6803   | 0.9344  | 0.3603  | 0.3267  | 2.509    | 0.1132   | 1.161  | 0.9651 | 1.397  | 0.8251 |
| rs4648276  | PTGS2 | intron        | 1 | 184912111 | -0.01968  | 0.01894 | -0.05679  | 0.01744   | -1.039   | 0.2989   | 0.8692  | 0.1517  | 0.1279  | 2.389    | 0.1222   | 1.22   | 0.9479 | 1.57   | 0.8251 |
| rs5277     | PTGS2 | coding        | 1 | 184914820 | 0.01934   | 0.01763 | -0.01522  | 0.0539    | 1.097    | 0.2727   | 0.9502  | 0.1256  | 0.153   | 3.045    | 0.081    | 0.7953 | 0.6146 | 1.029  | 0.8251 |
| rs20417    | PTGS2 | flanking_5UTR | 1 | 184916944 | -0.02212  | 0.0174  | -0.05623  | 0.01199   | -1.271   | 0.2038   | 0.7365  | 0.1741  | 0.1564  | 1.144    | 0.2849   | 1.137  | 0.8963 | 1.44   | 0.8667 |
| rs689466   | PTGS2 | flanking_5UTR | 1 | 184917374 | -0.01962  | 0.01661 | -0.05218  | 0.01294   | -1.181   | 0.2376   | 0.798   | 0.194   | 0.1957  | 0.00867  | 0.9258   | 0.9895 | 0.7924 | 1.236  | 0.9747 |
| rs1930438  | IKBKE | flanking_5UTR | 1 | 204709729 | -0.002078 | 0.01607 | -0.03358  | 0.02942   | -0.1293  | 0.8971   | 0.9617  | 0.1692  | 0.1728  | 2.009    | 0.1563   | 0.169  | 0.942  | 1.45   | 0.8251 |
| rs1539243  | IKBKE | coding        | 1 | 204714410 | 0.01676   | 0.01713 | -0.01682  | 0.05034   | 0.9784   | 0.3279   | 0.875   | 0.3868  | 0.376   | 0.04744  | 0.8276   | 0.9743 | 0.7711 | 1.231  | 0.9727 |
| rs2297546  | IKBKE | intron        | 1 | 204714660 | 0.03769   | 0.01316 | 0.01189   | 0.06349   | 2.863    | 0.004219 | 0.2238  | 0.3868  | 0.376   | 0.2482   | 0.6184   | 1.047  | 0.8737 | 1.255  | 0.9229 |
| rs4845107  | IKBKE | intron        | 1 | 204715392 | 0.001636  | 0.01794 | -0.03353  | 0.03881   | 0.09116  | 0.9274   | 0.9667  | 0.1791  | 0.1535  | 2.371    | 0.1236   | 1.203  | 0.9507 | 1.522  | 0.8251 |
| rs10863389 | IKBKE | intron        | 1 | 204722915 | 0.03138   | 0.01366 | 0.004604  | 0.05815   | 2.297    | 0.02167  | 0.3828  | 0.3229  | 0.3318  | 0.675    | 0.9606   | 0.7961 | 0.159  | 0.9368 |        |
| rs3024498  | IKBKE | intron        | 1 | 204723200 | 0.0223    | 0.01463 | -0.00637  | 0.05097   | 1.524    | 0.1275   | 0.7105  | 0.2736  | 0.2587  | 0.9938   | 0.9938   | 0.9992 | 0.8174 | 1.221  | 0.996  |
| rs1118092  | IKBKE | intron        | 1 | 204723393 | -0.02626  | 0.01316 | -0.05205  | -0.00459  | -1.99    | 0.04613  | 0.5001  | 0.398   | 0.3929  | 0.054    | 0.8163   | 1.022  | 0.8534 | 1.223  | 0.9727 |
| rs12728136 | IKBKE | intron        | 1 | 204727145 | -0.04236  | 0.01171 | -0.07588  | -0.008849 | -2.477   | 0.1327   | 0.3502  | 0.1534  | 0.1733  | 1.431    | 0.2316   | 0.8639 | 0.6796 | 1.098  | 0.8501 |
| rs10863430 | IKBKE | intron        | 1 | 204731030 | -0.01571  | 0.01758 | -0.05017  | 0.01875   | -0.8934  | 0.3717   | 0.875   | 0.1771  | 0.1626  | 0.7453   | 0.388    | 1.108  | 0.8774 | 1.4    | 0.889  |
| rs12026566 | IKBKE | intron        | 1 | 204733357 | 0.03582   | 0.01423 | -0.007933 | 0.06372   | 2.517    | 0.01186  | 0.3502  | 0.2436  | 0.2855  | 0.5666   | 0.5666   | 0.9428 | 0.7747 | 1.147  | 0.8895 |
| rs3748022  | IKBKE | coding        | 1 | 204736088 | 0.02983   | 0.01558 | -0.0007   | 0.06036   | 1.91     | 0.05563  | 0.5415  | 0.2736  | 0.2165  | 2.108    | 0.1465   | 1.167  | 0.9474 | 1.437  | 0.8251 |
| rs15672    | IKBKE | UTR           | 1 | 204736581 | -0.0273   | 0.01293 | -0.05265  | -0.001957 | -2.111   | 0.03481  | 0.4572  | 0.4764  | 0.4846  | 0.1345   | 0.7138   | 0.9676 | 0.8114 | 1.154  | 0.943  |
| rs11578093 | IKBKE | flanking_3UTR | 1 | 204737277 | -0.03217  | 0.0134  | -0.05844  | -0.005904 | -2.401   | 0.01642  | 0.3581  | 0.3868  | 0.3706  | 0.558    | 0.558    | 1.071  | 0.8939 | 1.284  | 0.889  |
| rs3024498  | IL10  | 3UTR          | 1 | 205008152 | -0.006833 | 0.01487 | -0.03598  | 0.02231   | -0.4595  | 0.6459   | 0.9344  | 0.1771  | 0.2485  | 0.2865   | 0.5925   | 0.9453 | 0.7693 | 1.162  | 0.8895 |
| rs3024498  | IL10  | intron        | 1 | 205010336 | -0.00735  | 0.01292 | -0.03267  | 0.01797   | -0.5689  | 0.5695   | 0.9328  | 0.4652  | 0.4954  | 1.814    | 0.1781   | 0.886  | 0.7429 | 1.057  | 0.8251 |
| rs3024493  | IL10  | intron        | 1 | 205010591 | 0.002348  | 0.01734 | -0.03163  | 0.03633   | 1.1354   | 0.8923   | 0.9617  | 0.1542  | 0.1721  | 1.145    | 0.2847   | 0.8774 | 0.6904 | 1.115  | 0.8667 |
| rs1554286  | IL10  | intron        | 1 | 205010856 | 0.008102  | 0.01673 | -0.02468  | 0.04089   | 0.4844   | 0.6281   | 0.9344  | 0.1978  | 0.1875  | 0.3375   | 0.5613   | 1.068  | 0.855  | 1.335  | 0.8895 |
| rs3021094  | IL10  | intron        | 1 | 205011575 | -0.01222  | 0.02258 | -0.05647  | 0.03203   | -0.5411  | 0.5894   | 0.9344  | 0.09826 | 0.08256 | 1.514    | 0.2185   | 1.211  | 0.8925 | 1.643  | 0.8404 |
| rs10735501 | ATF3  | intron        | 1 | 210852083 | -0.008342 | 0.01274 | -0.03331  | 0.01662   | -0.655   | 0.5125   | 0.9107  | 0.5287  | 0.4869  | 3.462    | 0.0628   | 1.182  | 0.7753 | 1.619  | 0.8966 |
| rs7516737  | ATF3  | intron        | 1 | 210852786 | 0.03339   | 0.01821 | -0.00228  | 0.06908   | 1.834    | 0.06668  | 0.589   | 0.1143  | 0.1502  | 0.2045   | 0.6511   | 0.9441 | 0.9047 | 1.291  | 0.889  |
| rs6701733  | ATF3  | intron        | 1 | 210852873 | 0.01896   | 0.02038 | -0.02097  | 0.0589    | 0.9307   | 0.8521   | 0.875   | 0.1132  | 0.1032  | 0.1875   | 0.5141   | 1.109  | 0.8362 | 1.47   | 0.889  |
| rs9429889  | ATF3  | intron        | 1 | 210856152 | 0.003112  | 0.01711 | -0.03042  | 0.03864   | 0.1819   | 0.9517   | 0.959   | 0.1729  | 0.1667  | 0.1717   | 0.1366   | 0.7117 | 0.8271 | 1.321  | 0.943  |
| rs1126526  | ATF3  | 3UTR          | 1 | 210860128 | -0.02842  | 0.01663 | -0.06102  | 0.004176  | -1.709   | 0.08755  | 0.6537  | 0.2052  | 0.1818  | 1.762    | 0.1844   | 1.162  | 0.9308 | 1.45   | 0.8251 |
| rs10475    | ATF3  | 3UTR          | 1 | 210860236 | -0.002436 | 0.01542 | -0.03265  | 0.02778   | -0.158   | 0.8745   | 0.9617  | 0.2189  | 0.1995  | 1.135    | 0.2868   | 1.124  | 0.9062 | 1.395  | 0.8667 |
| rs8679     | PARP1 | 3UTR          | 1 | 224615177 | -0.01156  | 0.01513 | -0.04122  | 0.0181    | -0.7641  | 0.4448   | 0.8766  | 0.2394  | 0.2373  | 0.0122   | 0.912    | 1.012  | 0.8229 | 1.244  | 0.9747 |
| rs3219142  | PARP1 | intron        | 1 | 224618691 | 0.003646  | 0.01627 | -0.02825  | 0.03554   | 0.2241   | 0.8227   | 0.959   | 0.199   | 0.1872  | 0.4456   | 0.5044   | 1.079  | 0.8636 | 1.347  | 0.8947 |
| rs3219123  | PARP1 | intron        | 1 | 224621971 | -0.02069  | 0.02635 | -0.07235  | 0.03096   | -0.7852  | 0.4324   | 0.8766  | 0.06343 | 0.05701 | 0.3661   | 0.5451   | 1.12   | 0.7753 | 1.619  | 0.8966 |
| rs3219110  | PARP1 | intron        | 1 | 224624501 | -0.0195   | 0.01308 | -0.04513  | 0.006137  | -1.491   | 0.1361   | 0.7119  | 0.4403  | 0.4213  | 0.7316   | 0.3924   | 1.081  | 0.9047 | 1.291  | 0.889  |
| rs1805410  | PARP1 | intron        | 1 | 224635288 | -0.02884  | 0.01799 | -0.06381  | 0.00673   | -1.586   | 0.1128   | 0.8717  | 0.1555  | 0.1487  | 0.1779   | 0.6732   | 1.054  | 0.8254 | 1.346  | 0.9688 |
| rs3219073  | PARP1 | intron        | 1 | 224635998 | -0.0121   | 0.01721 | -0.04583  | 0.02163   | -0.7031  | 0.482    | 0.9107  | 0.199   | 0.1664  | 3.591    | 0.05809  | 1.245  | 0.9923 | 1.561  | 0.8251 |
| rs1805415  | PARP1 | coding        | 1 | 224637463 | 0.06793   | 0.01763 | 0.03337   | 0.10265   | 3.852    | 0.000119 | 0.01418 | 0.1209  | 0.1276  | 10.2     | 0.001402 | 0.6597 | 0.5105 | 0.8526 | 0.6689 |
| rs2048424  | PARP1 | intron        | 1 | 224649630 | 0.03015   | 0.01364 | 0.003421  | 0.05687   | 2.211    | 0.0271   | 0.417   | 0.3229  | 0.3421  | 0.1839   | 0.367    | 0.9174 | 0.7608 | 1.106  | 0.889  |
| rs7594497  | PNP1  | coding        | 2 | 55726042  | -0.008034 | 0.02757 | -0.06207  | 0.046     | -0.2914  | 0.7707   | 0.9578  | 0.06716 | 0.05778 | 0.7588   | 0.3837   | 1.174  | 0.818  | 1.685  | 0.889  |
| rs2627775  | PNP1  | intron        | 2 | 55730617  | 0.0222    | 0.01293 | -0.00315  | 0.04755   | 1.716    | 0.08624  | 0.6537  | 0.0716  | 0.4406  | 1.901    | 0.168    | 1.132  | 0.9489 | 1.351  | 0.8251 |
| rs17800203 | PNP1  | intron        | 2 | 55737237  | 0.00648   | 0.01592 | -0.02473  | 0.03769   | 0.4069   | 0.6841   | 0.9344  | 0.1791  | 0.2142  | 3.806    | 0.05108  | 0.8005 | 0.64   | 1.001  | 0.8251 |
| rs782634   | PNP1  | intron        | 2 | 55751204  | -0.01206  | 0.01286 | -0.03726  | 0.01314   | -0.9381  | 0.3483   | 0.875   | 0.4722  | 0.366   | 2.366    | 0.124    | 0.8704 | 0.7292 | 1.039  | 0.8251 |
| rs12617829 | PNP1  | intron        | 2 | 55754821  | 0.003777  | 0.02115 | -0.03768  | 0.04523   | 0.1786   | 0.8583   | 0.959   | 0.1107  | 0.09784 | 0.8897   | 0.3456   | 1.148  | 0.8618 | 1.528  | 0.889  |
| rs10466040 | PNP1  | intron        | 2 | 55757215  | -0.05006  | 0.02039 | -0.09002  | -0.01071  | -2.485   | 0.01412  | 0.3502  | 0.1095  | 0.1142  | 0.112    | 0.7379   | 0.9633 | 0.7206 | 1.261  | 0.9435 |
| rs782620   | PNP1  | intron        | 2 | 55760967  | -0.000266 | 0.02659 | -0.05238  | 0.05184   | -0.01002 | 0.992    | 0.9941  | 0.06594 | 0.03203 | 0.858    | 1.033    | 0.7233 | 0.7233 | 1.475  | 0.9747 |
| rs782572   | PNP1  | coding        | 2 | 55765624  | 0.01338   | 0.01279 | -0.0117   | 0.03945   | 1.046    | 0.2958   | 0.8692  | 0.4988  | 0.4823  | 0.5408   | 0.4621   | 1.068  | 0.8959 | 1.274  | 0.889  |
| rs842648   | REL   | intron        | 2 | 60969985  | -0.01075  | 0.02398 | -0.05775  | 0.03624   | -0.4485  | 0.6538   | 0.9344  | 0.0709  | 0.08012 | 0.5977   | 0.4394   | 0.876  | 0.6262 | 1.226  | 0.889  |
| rs842647   | REL   | intron        | 2 | 60972975  | 0.01652   | 0.01372 | -0.01036  | 0.0434    | 1.204    | 0.2285   | 0.7842  | 0.      |         |          |          |        |        |        |        |

|            |           |                |           |          |          |           |          |          |        |         |         |           |         |        |        |        |        |
|------------|-----------|----------------|-----------|----------|----------|-----------|----------|----------|--------|---------|---------|-----------|---------|--------|--------|--------|--------|
| rs2287047  | IL1R1     | intron         | 0.006859  | 0.011364 | -0.01987 | 0.03358   | 0.503    | 0.615    | 0.9344 | 0.3321  | 0.3207  | 0.2926    | 0.5885  | 1.053  | 0.873  | 1.27   | 0.8995 |
| 2          | 102140486 | intron         | 0.001208  | 0.011293 | -0.01327 | 0.03742   | 0.9339   | 0.3504   | 0.875  | 0.4366  | 0.409   | 1.554     | 0.2126  | 1.12   | 0.9372 | 1.338  | 0.8397 |
| rs3917234  | IL1R1     | intron         | -0.003872 | 0.021144 | -0.0457  | 0.03835   | -0.1713  | 0.864    | 0.959  | 0.1095  | 0.09091 | 1.931     | 0.1646  | 1.229  | 0.9185 | 1.645  | 0.8251 |
| rs3917230  | IL1R1     | intron         | 0.003533  | 0.01284  | -0.02162 | 0.02869   | 0.2753   | 0.7831   | 0.9578 | 0.4341  | 0.4476  | 0.3685    | 0.5438  | 0.9466 | 0.7928 | 1.13   | 0.8966 |
| rs3917285  | IL1R1     | intron         | -0.01634  | 0.02049  | -0.05649 | 0.02382   | -0.7974  | 0.4253   | 0.8766 | 0.1045  | 0.114   | 0.4606    | 0.4974  | 0.9065 | 0.6828 | 1.204  | 0.8947 |
| rs3917289  | IL1R1     | intron         | 0.03114   | 0.02461  | -0.01709 | 0.07936   | 1.265    | 0.2058   | 0.7381 | 0.06592 | 0.07165 | 0.2521    | 0.6156  | 0.9144 | 0.6448 | 1.297  | 0.9229 |
| rs3917282  | IL1R1     | intron         | -0.01054  | 0.02458  | -0.05871 | 0.03762   | -0.4291  | 0.6679   | 0.9344 | 0.08085 | 0.0755  | 0.1983    | 0.5551  | 1.077  | 0.7769 | 1.493  | 0.9342 |
| rs3917318  | IL1R1     | intron         | -0.006984 | 0.01394  | -0.0343  | 0.02033   | -0.5012  | 0.6163   | 0.9344 | 0.2993  | 0.3143  | 0.5282    | 0.4674  | 0.9315 | 0.7694 | 1.128  | 0.889  |
| rs2159307  | IL1R1     | coding         | 0.01573   | 0.02927  | -0.04164 | 0.07309   | 0.5374   | 0.5911   | 0.9344 | 0.06343 | 0.05547 | 0.5714    | 0.4497  | 1.153  | 0.7966 | 1.67   | 0.889  |
| rs2110726  | IL1R1     | 3'UTR          | 0.004163  | 0.0134   | -0.02209 | 0.03042   | 0.3108   | 0.756    | 0.9578 | 0.3691  | 0.3503  | 0.7598    | 0.3834  | 1.085  | 0.9032 | 1.303  | 0.889  |
| rs3732131  | IL1R1     | 3'UTR          | -0.00472  | 0.02474  | -0.0532  | 0.04376   | -0.1908  | 0.8487   | 0.959  | 0.07836 | 0.06086 | 2.412     | 0.1204  | 1.312  | 0.9306 | 1.849  | 0.8251 |
| rs3917332  | IL1R1     | flanking_3'UTR | -0.007622 | 0.01587  | -0.03873 | 0.02349   | -0.4802  | 0.6311   | 0.9344 | 0.194   | 0.196   | 0.0121    | 0.9124  | 0.9876 | 0.7908 | 1.233  | 0.9747 |
| rs3917332  | IL1R1     | flanking_3'UTR | 0.03748   | 0.01323  | 0.01154  | 0.06341   | 2.832    | 0.004663 | 0.2238 | 0.3532  | 0.3883  | 2.604     | 0.1066  | 0.8604 | 0.7167 | 1.033  | 0.8251 |
| rs2232354  | IL1RN     | intron         | -0.03054  | 0.01318  | -0.05636 | -0.004714 | -2.318   | 0.02051  | 0.3764 | 0.4117  | 0.3798  | 2.117     | 0.1457  | 1.143  | 0.9547 | 1.368  | 0.8251 |
| rs3213448  | IL1RN     | intron         | -0.03426  | 0.01934  | -0.07216 | 0.003643  | -1.772   | 0.07654  | 0.8295 | 0.1381  | 0.1156  | 2.311     | 0.1285  | 1.226  | 0.9425 | 1.594  | 0.8251 |
| rs315934   | IL1RN     | intron         | -0.01228  | 0.01613  | -0.0439  | 0.01934   | -0.7612  | 0.4466   | 0.8766 | 0.2114  | 0.2096  | 0.01068   | 0.9177  | 1.011  | 0.8152 | 1.255  | 0.9747 |
| rs3917211  | IL1RN     | flanking_3'UTR | 0.02098   | 0.01577  | -0.00992 | 0.05188   | 1.33     | 0.1835   | 0.7365 | 0.2095  | 0.2119  | 0.01698   | 0.8963  | 0.9857 | 0.7943 | 1.223  | 0.9747 |
| rs380092   | IL1RN     | intron         | -0.01286  | 0.01395  | -0.04021 | 0.0145    | -0.9213  | 0.357    | 0.875  | 0.3371  | 0.3086  | 1.844     | 0.3745  | 1.139  | 0.9439 | 1.374  | 0.8251 |
| rs431726   | IL1RN     | intron         | -0.01735  | 0.01464  | -0.04604 | 0.01135   | -1.185   | 0.2361   | 0.798  | 0.2699  | 0.2492  | 1.109     | 0.2923  | 1.114  | 0.9114 | 1.361  | 0.8667 |
| rs315952   | IL1RN     | coding         | -0.02175  | 0.01435  | -0.04986 | 0.006373  | -1.516   | 0.1297   | 0.7105 | 0.3045  | 0.2785  | 1.622     | 0.2028  | 1.134  | 0.9344 | 1.376  | 0.8386 |
| rs3917211  | IL1RN     | flanking_3'UTR | -0.01326  | 0.01399  | -0.04068 | 0.01415   | -0.9482  | 0.3431   | 0.875  | 0.3221  | 0.1778  | 1.816     | 0.1778  | 1.14   | 0.9423 | 1.378  | 0.8251 |
| rs315949   | IL1RN     | flanking_3'UTR | 0.03173   | 0.013    | 0.006254 | 0.0572    | 2.441    | 0.01469  | 0.3502 | 0.3694  | 0.4244  | 6.232     | 0.01254 | 0.7946 | 0.6632 | 0.9519 | 0.8251 |
| rs13073869 | PPARG     | intron         | -0.003678 | 0.01477  | -0.03262 | 0.02326   | -0.2491  | 0.8033   | 0.9579 | 0.2637  | 0.2562  | 0.1457    | 0.7026  | 1.04   | 0.851  | 1.271  | 0.943  |
| rs31698951 | PPARG     | intron         | -0.02091  | 0.01988  | -0.05988 | 0.01805   | -1.052   | 0.2929   | 0.8692 | 0.1219  | 0.1202  | 0.0136    | 0.9072  | 1.016  | 0.7761 | 1.33   | 0.9747 |
| rs4135247  | PPARG     | intron         | 0.007302  | 0.01287  | -0.00349 | 0.03265   | 0.5674   | 0.5705   | 0.9328 | 0.4328  | 0.3975  | 2.556     | 0.1099  | 1.157  | 0.9676 | 1.382  | 0.8251 |
| rs4135288  | PPARG     | intron         | 0.0229    | 0.02368  | -0.02352 | 0.06931   | 0.967    | 0.3336   | 0.875  | 0.07338 | 0.07627 | 0.05957   | 0.8072  | 0.9591 | 0.6861 | 1.341  | 0.9727 |
| rs2959273  | PPARG     | intron         | -0.005378 | 0.01303  | -0.03091 | 0.02016   | -0.4128  | 0.6798   | 0.9344 | 0.3691  | 0.396   | 1.516     | 0.2183  | 0.8923 | 0.7442 | 1.07   | 0.8404 |
| rs4135275  | PPARG     | intron         | 0.005606  | 0.01632  | -0.02638 | 0.03759   | 0.3435   | 0.7312   | 0.953  | 0.2045  | 0.1767  | 2.514     | 0.1129  | 1.198  | 0.9581 | 1.497  | 0.8251 |
| rs4135286  | PPARG     | intron         | 0.00583   | 0.01802  | -0.02949 | 0.04115   | 0.3235   | 0.7463   | 0.9578 | 0.1356  | 0.159   | 2.127     | 0.1447  | 0.8299 | 0.6457 | 1.066  | 0.8251 |
| rs1175544  | PPARG     | intron         | 0.001458  | 0.01274  | -0.02352 | 0.02644   | 0.1144   | 0.9039   | 0.9667 | 0.5     | 0.4407  | 7.016     | 0.0608  | 1.269  | 1.064  | 1.514  | 0.8251 |
| rs1175544  | PPARG     | intron         | -0.009212 | 0.01341  | -0.0355  | 0.01708   | -0.6867  | 0.4923   | 0.9107 | 0.2975  | 0.338   | 3.707     | 0.0542  | 0.8296 | 0.6858 | 1.003  | 0.8251 |
| rs1797912  | PPARG     | intron         | 0.003877  | 0.0131   | -0.0218  | 0.02955   | 0.296    | 0.7673   | 0.9578 | 0.3557  | 0.3827  | 1.547     | 0.2136  | 0.8905 | 0.7418 | 1.069  | 0.8397 |
| rs3856806  | PPARG     | coding         | -0.005606 | 0.01954  | -0.0439  | 0.03268   | -0.287   | 0.7742   | 0.9578 | 0.1256  | 0.1117  | 0.9298    | 0.3349  | 1.142  | 0.8714 | 1.498  | 0.889  |
| rs3918354  | CCR2      | flanking_5'UTR | 0.06324   | 0.02514  | 0.01396  | 0.01225   | 2.515    | 0.01194  | 0.3502 | 0.06219 | 0.06009 | 0.3502    | 0.8451  | 1.037  | 0.7189 | 1.496  | 0.9733 |
| rs3918358  | CCR2      | flanking_5'UTR | 0.01635   | 0.01381  | -0.0107  | 0.04341   | 1.185    | 0.2363   | 0.798  | 0.2699  | 0.2835  | 0.458     | 0.4965  | 0.9342 | 0.7672 | 1.138  | 0.8947 |
| rs3092961  | CCR2      | intron         | -0.00196  | 0.01489  | -0.03114 | 0.02722   | -0.1317  | 0.8953   | 0.9617 | 0.2045  | 0.2324  | 1.049     | 0.3059  | 0.8935 | 0.7202 | 1.109  | 0.8833 |
| rs4637244  | CCR2      | intron         | 0.00301   | 0.01299  | -0.02245 | 0.02847   | 0.2318   | 0.8167   | 0.9579 | 0.3582  | 0.3582  | 0.6153    | 0.4328  | 0.9295 | 0.7742 | 1.116  | 0.889  |
| rs46374212 | CCR2      | coding         | -0.03736  | 0.02225  | -0.08096 | 0.005246  | -1.679   | 0.09319  | 0.6537 | 0.08728 | 0.4992  | 0.1245    | 0.7242  | 0.9458 | 0.6942 | 1.289  | 0.943  |
| rs52140    | TLR9      | coding         | 0.01143   | 0.01299  | -0.01404 | 0.0369    | 0.8798   | 0.379    | 0.875  | 0.4291  | 0.4492  | 0.8093    | 0.3663  | 0.9218 | 0.772  | 1.101  | 0.889  |
| rs1483185  | PRKCD     | intron         | -0.000882 | 0.01767  | -0.03552 | 0.03376   | -0.04982 | 0.9602   | 0.9841 | 0.1542  | 0.1556  | 0.007375  | 0.9316  | 0.9894 | 0.7758 | 1.262  | 0.9747 |
| rs17233475 | PRKCD     | intron         | -0.004804 | 0.02022  | -0.04444 | 0.03483   | -0.2376  | 0.8122   | 0.9579 | 0.1169  | 0.1042  | 0.8301    | 0.3623  | 1.139  | 0.8611 | 1.506  | 0.889  |
| rs750170   | PRKCD     | intron         | -0.003416 | 0.01857  | -0.00684 | 0.03297   | -0.184   | 0.854    | 0.959  | 0.1381  | 0.1341  | 0.6803    | 0.7942  | 1.035  | 0.8008 | 1.337  | 0.9636 |
| rs17052826 | PRKCD     | intron         | 0.01534   | 0.01706  | -0.0181  | 0.04877   | 0.899    | 0.3687   | 0.875  | 0.158   | 0.1888  | 3.232     | 0.07222 | 0.8063 | 0.6374 | 1.02   | 0.8251 |
| rs1130350  | PRKCD     | intron         | 0.009734  | 0.01339  | -0.0165  | 0.03597   | 0.7272   | 0.4671   | 0.902  | 0.3433  | 0.3683  | 1.346     | 0.2459  | 0.8967 | 0.7459 | 1.078  | 0.8667 |
| rs3084863  | PRKCD     | intron         | 0.002817  | 0.01272  | -0.02211 | 0.02774   | 0.2215   | 0.8247   | 0.959  | 0.4863  | 0.4615  | 1.224     | 0.2685  | 1.105  | 0.9261 | 1.318  | 0.8667 |
| rs182052   | ADIPOQ    | intron         | -0.0143   | 0.01535  | -0.04439 | 0.01579   | -0.9316  | 0.3516   | 0.875  | 0.2095  | 0.2119  | 0.01698   | 0.8963  | 0.9857 | 0.7943 | 1.223  | 0.9747 |
| rs2306574  | ADIPOQ    | coding         | 0.0122    | 0.01313  | -0.01355 | 0.03794   | 0.9286   | 0.3532   | 0.875  | 0.4241  | 0.4204  | 0.2825    | 0.8665  | 1.015  | 0.9497 | 1.213  | 0.9747 |
| rs7643235  | PRKCD     | flanking_3'UTR | -0.000295 | 0.0136   | -0.02895 | 0.02636   | -0.02166 | 0.9827   | 0.9883 | 0.3483  | 0.3503  | 0.009171  | 0.9237  | 0.991  | 0.824  | 1.192  | 0.9747 |
| rs729396   | PRKCD     | flanking_3'UTR | -0.008315 | 0.0136   | -0.03497 | 0.01834   | -0.6114  | 0.541    | 0.9118 | 0.3325  | 0.3297  | 0.01706   | 0.8961  | 1.013  | 0.8397 | 1.221  | 0.9747 |
| rs182052   | ADIPOQ    | intron         | -0.006884 | 0.02437  | -0.05465 | 0.04088   | -0.2825  | 0.7776   | 0.9578 | 0.06343 | 0.06086 | 0.5652    | 0.8121  | 1.045  | 0.7265 | 1.503  | 0.9727 |
| rs182052   | ADIPOQ    | intron         | -0.01374  | 0.02168  | -0.05624 | 0.02876   | -0.6337  | 0.5263   | 0.9107 | 0.1107  | 0.09861 | 0.783     | 0.3762  | 1.138  | 0.8547 | 1.515  | 0.889  |
| rs223296   | ADIPOQ    | intron         | 0.01051   | 0.01663  | -0.02209 | 0.04311   | 0.6321   | 0.5274   | 0.9107 | 0.1803  | 0.1841  | 0.04754   | 0.8274  | 0.9749 | 0.7761 | 1.225  | 0.9727 |
| rs12495941 | ADIPOQ    | intron         | 0.008339  | 0.01355  | -0.01822 | 0.03489   | 0.6155   | 0.5393   | 0.9118 | 0.3532  | 0.365   | 0.2964    | 0.5861  | 0.9503 | 0.7909 | 1.142  | 0.8995 |
| rs182052   | ADIPOQ    | intron         | -0.01111  | 0.01194  | -0.04914 | 0.02692   | -0.5728  | 0.5668   | 0.9328 | 0.143   | 0.121   | 2.148     | 0.1427  | 1.213  | 0.9367 | 1.571  | 0.8251 |
| rs3821799  | ADIPOQ    | intron         | -0.00306  | 0.01284  | -0.02822 | 0.0221    | -0.2384  | 0.8116   | 0.9579 | 0.4863  | 0.4553  | 1.917     | 0.1662  | 1.133  | 0.9496 | 1.351  | 0.8251 |
| rs1063539  | ADIPOQ    | 3'UTR          | -0.01376  | 0.01594  | -0.05088 | 0.02335   | -0.7268  | 0.4674   | 0.902  | 0.1455  | 0.135   | 0.4562    | 0.4994  | 1.091  | 0.8474 | 1.404  | 0.8947 |
| rs1086638  | TLR10     | coding         | -0.02226  | 0.01739  | -0.05634 | 0.01182   | -1.26    | 0.2005   | 0.7365 | 0.1455  | 0.1427  | 0.03704   | 0.8601  | 0.993  | 0.7963 | 1.314  | 0.9747 |
| rs7694115  | TLR10     | intron         | 0.002467  | 0.01325  | -0.02351 | 0.02845   | 0.1861   | 0.8523   | 0.959  | 0.3292  | 0.3297  | 0.0007061 | 0.9788  | 1.025  | 0.8271 | 1.203  | 0.9913 |
| rs4130727  | TLR10     | intron         | -0.0214   | 0.01948  | -0.05958 | 0.01678   | -1.099   | 0.272    | 0.8502 | 0.1045  | 0.1134  | 0.4058    | 0.5241  | 0.9119 | 0.6866 | 1.211  | 0.8947 |
| rs743595   | TLR1      | intron         | 0.01129   | 0.0161   | -0.02027 | 0.04285   | 0.7011   | 0.4833   | 0.9107 | 0.1953  | 0.1965  | 0.004405  | 0.9471  | 0.9925 | 0.7952 | 1.239  | 0.9752 |
| rs743594   | TLR1      | intron         | 0.008115  | 0.01668  | -0.02459 | 0.04081   | 0.4864   | 0.6267   | 0.9344 | 0.194   | 0.1829  | 0.4062    | 0.5239  | 1.076  | 0.8594 | 1.346  | 0.8947 |
| rs743551   | TLR1      | flanking_5'UTR | 0.008952  | 0.01439  | -0.01926 | 0.03716   | 0.622    | 0.534    | 0.9118 | 0.2531  | 0.2589  | 0.08568   |         |        |        |        |        |

|            |       |               |   |           |           |          |          |           |          |         |         |         |         |         |        |        |        |        |
|------------|-------|---------------|---|-----------|-----------|----------|----------|-----------|----------|---------|---------|---------|---------|---------|--------|--------|--------|--------|
| rs5743828  | TLR6  | flanking_3UTR | 4 | 38503915  | -0.0121   | 0.014759 | -0.04096 | 0.01676   | 0.4112   | 0.8766  | 0.2544  | 0.2492  | 0.06947 | 0.7921  | 1.028  | 0.8391 | 1.259  | 0.9636 |
| rs5321985  | TLR6  | coding        | 4 | 38506407  | -0.002568 | 0.011353 | -0.02921 | 0.02407   | -0.1889  | 0.8501  | 0.3284  | 0.3202  | 0.1503  | 0.6982  | 1.038  | 0.8601 | 1.252  | 0.943  |
| rs1039580  | TLR6  | flanking_5UTR | 4 | 38507899  | 0.001835  | 0.01278  | -0.02321 | 0.02888   | 0.8858   | 0.9617  | 0.4652  | 0.4738  | 0.1485  | 0.7     | 0.9659 | 0.8088 | 1.152  | 0.943  |
| rs4073     | IL8   | flanking_5UTR | 4 | 74824888  | -0.01628  | 0.01275  | -0.04128 | 0.008714  | -1.277   | 0.7365  | 0.4377  | 0.4461  | 0.1423  | 0.706   | 0.9665 | 0.8094 | 1.154  | 0.943  |
| rs4648004  | NFKB1 | intron        | 4 | 103680136 | -0.01027  | 0.01337  | -0.03647 | 0.01593   | -0.7682  | 0.4024  | 0.3619  | 0.3398  | 1.077   | 0.2994  | 1.102  | 0.917  | 1.325  | 0.8709 |
| rs4648022  | NFKB1 | intron        | 4 | 103715475 | 0.02416   | 0.02319  | -0.02129 | 0.0696    | 1.042    | 0.2975  | 0.09826 | 0.08166 | 1.703   | 0.1919  | 1.225  | 0.9027 | 1.663  | 0.8251 |
| rs3821958  | NFKB1 | intron        | 4 | 103727862 | 0.001287  | 0.01312  | -0.02443 | 0.027     | 0.09811  | 0.9219  | 0.3669  | 0.4052  | 3.063   | 0.08008 | 0.8506 | 0.7096 | 1.02   | 0.8251 |
| rs4648110  | NFKB1 | intron        | 4 | 103752867 | 0.00826   | 0.01587  | -0.02285 | 0.03937   | 0.5204   | 0.9344  | 0.2182  | 0.1949  | 1.657   | 0.198   | 1.153  | 0.9283 | 1.432  | 0.8347 |
| rs3804110  | NFKB1 | intron        | 4 | 103754859 | -0.004981 | 0.02655  | -0.05701 | 0.04705   | -0.1876  | 0.8512  | 0.0547  | 0.3535  | 0.5335  | 0.4651  | 1.149  | 0.7913 | 1.669  | 0.889  |
| rs4648123  | NFKB1 | intron        | 4 | 103755459 | 0.009418  | 0.0141   | -0.01822 | 0.03706   | 0.6679   | 0.5043  | 0.3028  | 2.605   | 0.1066  | 0.8513  | 0.7    | 1.035  | 0.8251 | 0.889  |
| rs4648141  | NFKB1 | intron        | 4 | 103755947 | 0.01526   | 0.01697  | -0.018   | 0.04853   | 0.8992   | 0.3686  | 0.1779  | 0.1641  | 0.6684  | 0.4136  | 1.102  | 0.873  | 1.391  | 0.889  |
| rs3804099  | TLR2  | coding        | 4 | 154844106 | 0.000625  | 0.01291  | -0.02467 | 0.02592   | 0.04844  | 0.9614  | 0.4229  | 0.4476  | 1.233   | 0.2668  | 0.9043 | 0.7571 | 1.08   | 0.8667 |
| rs2075786  | TLR2  | coding        | 4 | 154844859 | 0.02251   | 0.02504  | -0.02656 | 0.07158   | 0.8991   | 0.3637  | 0.06857 | 0.06857 | 1.233   | 0.2668  | 0.9043 | 0.7571 | 1.08   | 0.8667 |
| rs3775296  | TLR3  | UTR           | 4 | 187234761 | -0.01443  | 0.01612  | -0.04603 | 0.01717   | -0.895   | 0.3708  | 0.187   | 0.1937  | 0.1413  | 0.707   | 0.9578 | 0.7651 | 1.199  | 0.943  |
| rs1879026  | TLR3  | intron        | 4 | 187237315 | 0.02346   | 0.01604  | -0.00796 | 0.05489   | 1.463    | 0.1435  | 0.2114  | 0.188   | 1.728   | 0.1887  | 1.158  | 0.9303 | 1.442  | 0.8251 |
| rs375291   | TLR3  | coding        | 4 | 187241068 | 0.01829   | 0.01401  | -0.00917 | 0.04575   | 1.305    | 0.1918  | 0.313   | 0.2935  | 0.8904  | 0.3454  | 1.096  | 0.9056 | 1.327  | 0.889  |
| rs4975618  | TERT  | flanking_3UTR | 5 | 1305463   | 0.011745  | 0.0137   | -0.00939 | 0.0443    | 1.274    | 0.2027  | 0.3167  | 0.3413  | 1.353   | 0.2448  | 0.8944 | 0.7411 | 1.079  | 0.9368 |
| rs2063690  | TERT  | 3UTR          | 5 | 1306744   | 0.01126   | 0.01702  | -0.02209 | 0.04461   | 0.6618   | 0.5082  | 0.199   | 0.1586  | 5.563   | 0.01834 | 1.318  | 1.047  | 1.658  | 0.8251 |
| rs11133715 | TERT  | intron        | 5 | 1314052   | 0.01832   | 0.01338  | -0.00789 | 0.04454   | 1.37     | 0.1709  | 0.7365  | 0.3491  | 1.539   | 0.2148  | 0.8903 | 0.741  | 1.07   | 0.8397 |
| rs2736114  | TERT  | intron        | 5 | 1318204   | 0.007091  | 0.01493  | -0.02216 | 0.03834   | 0.4751   | 0.6347  | 0.9344  | 0.2737  | 4.925   | 0.02647 | 1.257  | 1.027  | 1.538  | 0.8251 |
| rs2075786  | TERT  | intron        | 5 | 1319310   | -0.01735  | 0.01343  | -0.04368 | 0.008977  | -1.292   | 0.1965  | 0.7365  | 0.3425  | 0.3598  | 0.6473  | 0.4211 | 0.9269 | 0.7705 | 1.115  |
| rs7726159  | TERT  | intron        | 5 | 1335319   | -0.01192  | 0.01344  | -0.03827 | 0.01443   | -0.8867  | 0.3753  | 0.3441  | 0.3161  | 1.773   | 0.1831  | 1.135  | 0.9418 | 1.369  | 0.8251 |
| rs2656377  | TERT  | intron        | 5 | 1340194   | 0.001178  | 0.01284  | -0.02399 | 0.02635   | 0.09174  | 0.9269  | 0.4425  | 0.4284  | 0.4034  | 0.5253  | 1.059  | 0.8669 | 1.265  | 0.8947 |
| rs2736114  | TERT  | intron        | 5 | 1341547   | 0.02423   | 0.01531  | -0.00577 | 0.05423   | 1.583    | 0.1136  | 0.6717  | 0.2531  | 0.3668  | 0.4099  | 0.946  | 0.7905 | 1.131  | 0.8966 |
| rs1900173  | IL6ST | intron        | 5 | 55275763  | -0.01559  | 0.02516  | -0.06491 | 0.03373   | -0.6196  | 0.9118  | 0.0796  | 0.06703 | 1.178   | 0.2778  | 1.204  | 0.8608 | 1.684  | 0.8667 |
| rs10940495 | IL6ST | intron        | 5 | 55298417  | -0.00031  | 0.01414  | -0.02803 | 0.02741   | -0.02192 | 0.9825  | 0.301   | 0.2863  | 0.5208  | 0.4705  | 1.074  | 0.8852 | 1.302  | 0.889  |
| rs11741953 | IL6ST | intron        | 5 | 55303571  | 0.009699  | 0.01981  | -0.02912 | 0.04852   | 0.4897   | 0.6244  | 0.1169  | 0.1175  | 0.9696  | 0.9947  | 0.7565 | 1.308  | 0.9862 | 0.889  |
| rs2069680  | F2RL2 | 3UTR          | 5 | 75949061  | 0.002362  | 0.01336  | -0.02382 | 0.02854   | 0.1768   | 0.8597  | 0.3965  | 0.4099  | 0.3668  | 0.4099  | 0.946  | 0.7905 | 1.132  | 0.8966 |
| rs2069680  | F2RL2 | intron        | 5 | 75950612  | 0.01661   | 0.01292  | -0.00871 | 0.04194   | 1.285    | 0.1987  | 0.7365  | 0.4925  | 0.53    | 0.8179  | 0.9795 | 0.8214 | 1.168  | 0.9727 |
| rs2069665  | F2RL2 | intron        | 5 | 75953058  | 0.02314   | 0.01501  | -0.00628 | 0.05255   | 1.541    | 0.1233  | 0.2102  | 0.2257  | 0.6985  | 0.4033  | 0.9129 | 0.7372 | 1.13   | 0.889  |
| rs2069646  | F2RL2 | flanking_5UTR | 5 | 75955389  | 0.0156    | 0.01428  | -0.01239 | 0.04359   | 1.092    | 0.2748  | 0.3072  | 0.227   | 2.892   | 0.08902 | 1.183  | 0.9747 | 1.435  | 0.8251 |
| rs2227744  | F2R   | flanking_5UTR | 5 | 76046105  | 0.01948   | 0.013    | -0.00589 | 0.04495   | 1.499    | 0.1341  | 0.4279  | 0.4707  | 3.679   | 0.05509 | 0.8408 | 0.7043 | 1.004  | 0.8251 |
| rs2227760  | F2R   | intron        | 5 | 76049220  | -0.02088  | 0.01513  | -0.05053 | 0.008774  | -1.38    | 0.1677  | 0.7365  | 0.2525  | 1.114   | 0.2913  | 1.117  | 0.9098 | 1.37   | 0.8667 |
| rs253061   | F2R   | intron        | 5 | 76049756  | 0.002097  | 0.01476  | -0.02683 | 0.03102   | 0.1421   | 0.887   | 0.2687  | 0.2581  | 0.2866  | 0.5924  | 1.056  | 0.8651 | 1.289  | 0.8995 |
| rs37248    | F2R   | intron        | 5 | 76052702  | -0.005953 | 0.01413  | -0.03365 | 0.02175   | -0.4212  | 0.6736  | 0.9344  | 0.3217  | 0.2892  | 0.5907  | 1.053  | 0.8718 | 1.273  | 0.8995 |
| rs155311   | F2R   | intron        | 5 | 76063579  | -0.01179  | 0.01492  | -0.04105 | 0.01746   | -0.7903  | 0.4294  | 0.2624  | 0.245   | 0.8023  | 0.3704  | 1.097  | 0.8662 | 1.342  | 0.889  |
| rs2050738  | F2R   | flanking_3UTR | 5 | 76068768  | 0.01078   | 0.01756  | -0.02364 | 0.0452    | 0.6138   | 0.5394  | 0.1334  | 0.1481  | 0.8798  | 0.3483  | 0.8853 | 0.6861 | 1.142  | 0.889  |
| rs3639342  | F2RL1 | flanking_5UTR | 5 | 76148625  | -0.02128  | 0.01876  | -0.05806 | 0.01549   | -1.134   | 0.2568  | 0.1169  | 0.1294  | 0.7126  | 0.3986  | 0.8905 | 0.6802 | 1.166  | 0.889  |
| rs2242991  | F2RL1 | 5UTR          | 5 | 76150615  | 0.02073   | 0.01853  | -0.01559 | 0.05705   | 1.119    | 0.2633  | 0.1228  | 0.1507  | 3.188   | 0.0742  | 0.789  | 0.6081 | 1.024  | 0.8251 |
| rs2243004  | F2RL1 | intron        | 5 | 76152873  | -0.03557  | 0.01578  | -0.0665  | -0.004641 | -2.254   | 0.02425 | 0.4131  | 0.1998  | 4.748   | 0.02933 | 1.265  | 1.024  | 1.563  | 0.8251 |
| rs2243010  | F2RL1 | intron        | 5 | 76153524  | 0.004274  | 0.01528  | -0.02568 | 0.03423   | 0.2797   | 0.7797  | 0.2475  | 0.2307  | 0.7744  | 0.3789  | 1.097  | 0.8928 | 1.347  | 0.889  |
| rs2243051  | F2RL1 | intron        | 5 | 76161558  | 0.01114   | 0.01299  | -0.01432 | 0.03661   | 0.8576   | 0.3911  | 0.9578  | 0.4676  | 4.75    | 0.0293  | 0.8208 | 0.6872 | 0.9804 | 0.8251 |
| rs2243066  | F2RL1 | 3UTR          | 5 | 76165869  | 0.02775   | 0.02137  | -0.01413 | 0.03662   | 1.299    | 0.1941  | 0.7365  | 0.1017  | 1.223   | 0.2667  | 0.8424 | 0.6215 | 1.142  | 0.8667 |
| rs2243208  | IL13  | flanking_3UTR | 5 | 132029050 | -0.006521 | 0.02222  | -0.05006 | 0.03702   | -0.2935  | 0.7691  | 0.08458 | 1.281   | 0.09938 | 0.2576  | 0.8373 | 0.6154 | 1.139  | 0.8667 |
| rs2243219  | IL4   | flanking_3UTR | 5 | 132030024 | 0.002532  | 0.02274  | -0.04204 | 0.04711   | 0.1113   | 0.9114  | 0.0796  | 0.09553 | 1.547   | 0.2136  | 0.8188 | 0.5973 | 1.122  | 0.8397 |
| rs2243302  | IL4   | flanking_5UTR | 5 | 132032430 | -0.01214  | 0.02096  | -0.05322 | 0.02894   | -0.5794  | 0.5623  | 0.09204 | 0.1071  | 1.235   | 0.2665  | 0.8452 | 0.6281 | 1.137  | 0.8667 |
| rs2227284  | IL4   | intron        | 5 | 132040624 | 0.007102  | 0.01446  | -0.02718 | 0.0295    | 0.80032  | 0.936   | 0.2811  | 1.003   | 0.3167  | 1.106   | 0.9079 | 1.348  | 0.8833 | 0.889  |
| rs2243263  | IL4   | intron        | 5 | 132041198 | 0.01276   | 0.0201   | -0.02664 | 0.05217   | 0.6347   | 0.5257  | 0.1119  | 0.1181  | 0.1813  | 0.6702  | 0.9417 | 0.7141 | 1.242  | 0.9368 |
| rs2243274  | IL4   | intron        | 5 | 132042731 | -0.008266 | 0.01775  | -0.04305 | 0.02852   | -0.4658  | 0.6414  | 0.9344  | 0.1704  | 2.328   | 0.127   | 1.205  | 0.9481 | 1.532  | 0.8251 |
| rs11741807 | EGR1  | flanking_3UTR | 5 | 137833551 | 0.003652  | 0.01312  | -0.01706 | 0.03436   | 0.6596   | 0.5096  | 0.4055  | 0.4199  | 0.4245  | 0.5147  | 0.9423 | 0.788  | 1.127  | 0.8947 |
| rs4986593  | NR3C1 | intron        | 5 | 142674039 | -0.0156   | 0.01668  | -0.04872 | 0.01713   | -0.9403  | 0.875   | 0.1791  | 0.1703  | 0.2705  | 0.603   | 1.063  | 0.8438 | 1.34   | 0.9073 |
| rs10482516 | NR3C1 | intron        | 5 | 142703055 | -0.02968  | 0.02247  | -0.07371 | 0.01436   | -1.321   | 0.1866  | 0.09453 | 0.2113  | 0.6457  | 1.074   | 0.7923 | 1.456  | 0.9278 | 0.889  |
| rs10482650 | NR3C1 | intron        | 5 | 142703055 | -0.003119 | 0.01282  | -0.02825 | 0.02201   | -0.2433  | 0.8078  | 0.449   | 0.4946  | 4.138   | 0.04192 | 0.8327 | 0.6979 | 0.9994 | 0.8251 |
| rs6877893  | NR3C1 | intron        | 5 | 142747933 | 0.02419   | 0.02891  | -0.03247 | 0.08084   | 0.8366   | 0.4028  | 0.9579  | 0.4053  | 0.3656  | 0.3607  | 0.8233 | 0.5422 | 1.25   | 0.889  |
| rs9324921  | NR3C1 | intron        | 5 | 142761760 | 0.004433  | 0.01815  | -0.03114 | 0.04      | 0.2443   | 0.807   | 0.9579  | 0.151   | 0.335   | 0.5627  | 0.9289 | 0.7237 | 1.192  | 0.8995 |
| rs10482616 | NR3C1 | intron        | 6 | 3020552   | -0.006358 | 0.01395  | -0.03369 | 0.02098   | -0.4559  | 0.6485  | 0.9344  | 0.2918  | 0.7953  | 0.3725  | 0.9162 | 0.7568 | 1.111  | 0.889  |
| rs17513046 | RIPK1 | flanking_5UTR | 6 | 3021335   | -0.003738 | 0.02049  | -0.04389 | 0.03641   | -0.1824  | 0.8552  | 0.959   | 0.104   | 1.825   | 0.1767  | 0.8109 | 0.5981 | 1.1    | 0.8251 |
| rs17541741 | RIPK1 | intron        | 6 | 3026578   | 0.00466   | 0.01292  | -0.02067 | 0.02999   | 0.3605   | 0.7185  | 0.9467  | 0.444   | 0.3298  | 0.5658  | 0.9495 | 0.7956 | 1.133  | 0.8995 |

|            |          |               |   |           |           |          |          |           |         |         |        |         |         |          |         |        |        |       |        |
|------------|----------|---------------|---|-----------|-----------|----------|----------|-----------|---------|---------|--------|---------|---------|----------|---------|--------|--------|-------|--------|
| rs17541803 | RIPK1    | intron        | 6 | 3031919   | 0.004872  | 0.022388 | -0.03809 | 0.05553   | 0.3651  | 0.715   | 0.9467 | 0.06592 | 0.07242 | 0.3224   | 0.5702  | 0.9039 | 0.6378 | 1.281 | 0.8995 |
| rs17541817 | RIPK1    | intron        | 6 | 3032005   | 0.004872  | 0.02298  | -0.05004 | 0.05565   | 0.1718  | 0.8636  | 0.959  | 0.04478 | 0.05239 | 0.6117   | 0.4341  | 0.8479 | 0.5605 | 1.283 | 0.889  |
| rs17513228 | RIPK1    | intron        | 6 | 3053287   | 0.009772  | 0.02236  | -0.03405 | 0.0536    | 0.437   | 0.8621  | 0.9344 | 0.09328 | 0.06629 | 0.2989   | 0.5839  | 1.089  | 0.8017 | 1.48  | 0.8995 |
| rs2282151  | NFKBIE   | 3UTR          | 6 | 44334173  | -0.00338  | 0.01587  | -0.03449 | 0.02773   | -0.213  | 0.8314  | 0.959  | 0.2313  | 0.1178  | 0.2249   | 0.7315  | 1.037  | 0.8413 | 1.279 | 0.943  |
| rs28365699 | NFKBIE   | 3UTR          | 6 | 44334411  | 0.02076   | 0.02843  | -0.03496 | 0.07648   | 0.7303  | 0.4653  | 0.902  | 0.04602 | 0.0416  | 0.2339   | 0.6286  | 1.111  | 0.7245 | 1.705 | 0.9278 |
| rs12211448 | NFKBIE   | intron        | 6 | 44335729  | -0.03734  | 0.01904  | -0.07466 | -1.58E-05 | -1.9    | 0.04997 | 0.5197 | 1.381   | 1.431   | 0.2317   | 1.173   | 1.032  | 0.9032 | 1.522 | 0.8501 |
| rs730775   | NFKBIE   | intron        | 6 | 44340052  | -0.01331  | 0.01298  | -0.03874 | 0.01212   | -1.026  | 0.305   | 0.875  | 0.4502  | 0.4384  | 0.2841   | 0.594   | 1.049  | 0.8791 | 1.252 | 0.8995 |
| rs5029930  | TNFAIP3  | intron        | 6 | 138232377 | -0.01593  | 0.02267  | -0.02851 | 0.06037   | 0.7027  | 0.4823  | 0.9107 | 0.08354 | 0.07573 | 0.4161   | 0.5189  | 1.112  | 0.8046 | 1.538 | 0.8947 |
| rs103070   | TNFAIP3  | intron        | 6 | 160021522 | 0.01056   | 0.02861  | -0.04551 | 0.06663   | 0.3691  | 0.7121  | 0.9461 | 0.05239 | 0.05239 | 0.9881   | 0.9881  | 0.997  | 0.6716 | 1.48  | 0.9943 |
| rs598493   | TNFAIP3  | intron        | 6 | 138237095 | -0.02208  | 0.01452  | -0.05054 | 0.006389  | -1.52   | 0.1286  | 0.7105 | 0.2706  | 0.2612  | 0.2251   | 0.6352  | 1.049  | 0.86   | 1.28  | 0.9278 |
| rs610604   | TNFAIP3  | intron        | 6 | 138241110 | -0.01853  | 0.01385  | -0.04588 | 0.008617  | -1.338  | 0.181   | 0.7365 | 0.3246  | 0.3159  | 0.1752   | 0.6756  | 1.041  | 0.8623 | 1.257 | 0.9368 |
| rs5746151  | SOD2     | intron        | 6 | 160021310 | -0.02181  | 0.02802  | -0.02875 | 0.03031   | -0.7785 | 0.4383  | 0.8766 | 0.04975 | 0.05401 | 0.1815   | 0.6701  | 0.917  | 0.6154 | 1.366 | 0.9368 |
| rs103070   | SOD2     | intron        | 6 | 160021522 | 0.008405  | 0.01514  | -0.02127 | 0.03808   | 0.5551  | 0.5789  | 0.9328 | 0.2313  | 0.2458  | 0.5655   | 0.452   | 0.9237 | 0.751  | 1.136 | 0.889  |
| rs5746136  | SOD2     | 3UTR          | 6 | 160023074 | 0.003194  | 0.01142  | -0.02464 | 0.03102   | 0.225   | 0.822   | 0.959  | 0.2811  | 0.3002  | 0.8704   | 0.3508  | 0.9117 | 0.7507 | 1.107 | 0.889  |
| rs2842959  | SOD2     | intron        | 6 | 160032659 | -0.01042  | 0.01279  | -0.03548 | 0.01464   | -0.8148 | 0.4152  | 0.8766 | 0.4875  | 0.5031  | 0.4795   | 0.4886  | 0.9397 | 0.788  | 1.121 | 0.8947 |
| rs2025761  | FGL2     | coding        | 7 | 76666889  | -0.008242 | 0.02211  | -0.05159 | 0.0351    | -0.3727 | 0.7094  | 0.9461 | 0.0995  | 0.08089 | 2.142    | 1.433   | 1.255  | 0.9253 | 1.703 | 0.8251 |
| rs3091259  | FGL2     | flanking_5UTR | 7 | 76667702  | -0.03198  | 0.01309  | -0.05764 | -0.006319 | -2.443  | 0.01463 | 0.3502 | 0.4339  | 0.4051  | 1.694    | 0.9418  | 1.345  | 0.9418 | 1.345 | 0.8251 |
| rs3091260  | FGL2     | flanking_5UTR | 7 | 76668331  | 0.0129    | 0.01397  | -0.01448 | 0.04027   | 0.9233  | 0.3559  | 0.875  | 0.3075  | 0.3074  | 2.52E-05 | 0.996   | 1      | 0.8266 | 1.211 | 0.996  |
| rs3211834  | CD36     | intron        | 7 | 80118053  | -0.009464 | 0.01338  | -0.0357  | 0.01877   | -0.7071 | 0.4796  | 0.9107 | 0.3719  | 0.386   | 0.418    | 0.5179  | 0.9419 | 0.7856 | 1.129 | 0.8947 |
| rs3211868  | CD36     | intron        | 7 | 80124958  | 0.03405   | 0.02529  | -0.01551 | 0.08362   | 1.347   | 0.1782  | 0.7365 | 0.0709  | 0.05624 | 1.838    | 0.1752  | 1.28   | 0.895  | 1.832 | 0.8251 |
| rs3211881  | CD36     | intron        | 7 | 80126790  | 0.02163   | 0.02485  | -0.02707 | 0.07034   | 0.8706  | 0.384   | 0.875  | 0.05473 | 0.1866  | 5.436    | 0.01972 | 0.651  | 0.4528 | 0.936 | 0.8251 |
| rs3211885  | CD36     | intron        | 7 | 80127338  | 0.001746  | 0.01323  | -0.02417 | 0.02767   | 0.132   | 0.895   | 0.9617 | 0.4129  | 0.4153  | 0.011    | 0.9165  | 0.9905 | 0.8265 | 1.184 | 0.9747 |
| rs2227631  | SERPINE1 | flanking_5UTR | 7 | 100556258 | 0.02866   | 0.01314  | 0.00902  | 0.05241   | 2.029   | 0.04256 | 0.4965 | 0.4316  | 0.4245  | 0.1021   | 0.7494  | 1.029  | 0.8618 | 1.23  | 0.9469 |
| rs2227657  | SERPINE1 | intron        | 7 | 100560179 | -0.005971 | 0.01879  | -0.04281 | 0.03086   | -0.3177 | 0.7507  | 0.9578 | 1.331   | 0.131   | 0.01939  | 0.8893  | 1.019  | 0.7857 | 1.321 | 0.9747 |
| rs17875657 | IKKB     | intron        | 8 | 42248662  | -0.02344  | 0.01265  | -0.04752 | 0.00205   | -1.798  | 0.07227 | 0.6196 | 0.4677  | 0.4615  | 0.07631  | 0.7824  | 1.025  | 0.8594 | 1.223 | 0.9618 |
| rs17875669 | IKKB     | intron        | 8 | 42259706  | -0.02344  | 0.01265  | -0.04752 | 0.00205   | -1.798  | 0.07227 | 0.6196 | 0.4677  | 0.4615  | 0.07631  | 0.7824  | 1.025  | 0.8594 | 1.223 | 0.9618 |
| rs3211881  | IKKB     | intron        | 7 | 80126790  | 0.02163   | 0.02485  | -0.02707 | 0.07034   | 0.8706  | 0.384   | 0.875  | 0.05473 | 0.1866  | 5.436    | 0.01972 | 0.651  | 0.4528 | 0.936 | 0.8251 |
| rs3211885  | IKKB     | intron        | 7 | 80127338  | 0.001746  | 0.01323  | -0.02417 | 0.02767   | 0.132   | 0.895   | 0.9617 | 0.4129  | 0.4153  | 0.011    | 0.9165  | 0.9905 | 0.8265 | 1.184 | 0.9747 |
| rs2227631  | SERPINE1 | flanking_5UTR | 7 | 100556258 | 0.02866   | 0.01314  | 0.00902  | 0.05241   | 2.029   | 0.04256 | 0.4965 | 0.4316  | 0.4245  | 0.1021   | 0.7494  | 1.029  | 0.8618 | 1.23  | 0.9469 |
| rs2227657  | SERPINE1 | intron        | 7 | 100560179 | -0.005971 | 0.01879  | -0.04281 | 0.03086   | -0.3177 | 0.7507  | 0.9578 | 1.331   | 0.131   | 0.01939  | 0.8893  | 1.019  | 0.7857 | 1.321 | 0.9747 |
| rs17875657 | IKKB     | intron        | 8 | 42248662  | -0.02344  | 0.01265  | -0.04752 | 0.00205   | -1.798  | 0.07227 | 0.6196 | 0.4677  | 0.4615  | 0.07631  | 0.7824  | 1.025  | 0.8594 | 1.223 | 0.9618 |
| rs17875669 | IKKB     | intron        | 8 | 42259706  | -0.02344  | 0.01265  | -0.04752 | 0.00205   | -1.798  | 0.07227 | 0.6196 | 0.4677  | 0.4615  | 0.07631  | 0.7824  | 1.025  | 0.8594 | 1.223 | 0.9618 |
| rs3211881  | IKKB     | intron        | 7 | 80126790  | 0.02163   | 0.02485  | -0.02707 | 0.07034   | 0.8706  | 0.384   | 0.875  | 0.05473 | 0.1866  | 5.436    | 0.01972 | 0.651  | 0.4528 | 0.936 | 0.8251 |
| rs3211885  | IKKB     | intron        | 7 | 80127338  | 0.001746  | 0.01323  | -0.02417 | 0.02767   | 0.132   | 0.895   | 0.9617 | 0.4129  | 0.4153  | 0.011    | 0.9165  | 0.9905 | 0.8265 | 1.184 | 0.9747 |
| rs2227631  | SERPINE1 | flanking_5UTR | 7 | 100556258 | 0.02866   | 0.01314  | 0.00902  | 0.05241   | 2.029   | 0.04256 | 0.4965 | 0.4316  | 0.4245  | 0.1021   | 0.7494  | 1.029  | 0.8618 | 1.23  | 0.9469 |
| rs2227657  | SERPINE1 | intron        | 7 | 100560179 | -0.005971 | 0.01879  | -0.04281 | 0.03086   | -0.3177 | 0.7507  | 0.9578 | 1.331   | 0.131   | 0.01939  | 0.8893  | 1.019  | 0.7857 | 1.321 | 0.9747 |
| rs17875657 | IKKB     | intron        | 8 | 42248662  | -0.02344  | 0.01265  | -0.04752 | 0.00205   | -1.798  | 0.07227 | 0.6196 | 0.4677  | 0.4615  | 0.07631  | 0.7824  | 1.025  | 0.8594 | 1.223 | 0.9618 |
| rs17875669 | IKKB     | intron        | 8 | 42259706  | -0.02344  | 0.01265  | -0.04752 | 0.00205   | -1.798  | 0.07227 | 0.6196 | 0.4677  | 0.4615  | 0.07631  | 0.7824  | 1.025  | 0.8594 | 1.223 | 0.9618 |
| rs3211881  | IKKB     | intron        | 7 | 80126790  | 0.02163   | 0.02485  | -0.02707 | 0.07034   | 0.8706  | 0.384   | 0.875  | 0.05473 | 0.1866  | 5.436    | 0.01972 | 0.651  | 0.4528 | 0.936 | 0.8251 |
| rs3211885  | IKKB     | intron        | 7 | 80127338  | 0.001746  | 0.01323  | -0.02417 | 0.02767   | 0.132   | 0.895   | 0.9617 | 0.4129  | 0.4153  | 0.011    | 0.9165  | 0.9905 | 0.8265 | 1.184 | 0.9747 |
| rs2227631  | SERPINE1 | flanking_5UTR | 7 | 100556258 | 0.02866   | 0.01314  | 0.00902  | 0.05241   | 2.029   | 0.04256 | 0.4965 | 0.4316  | 0.4245  | 0.1021   | 0.7494  | 1.029  | 0.8618 | 1.23  | 0.9469 |
| rs2227657  | SERPINE1 | intron        | 7 | 100560179 | -0.005971 | 0.01879  | -0.04281 | 0.03086   | -0.3177 | 0.7507  | 0.9578 | 1.331   | 0.131   | 0.01939  | 0.8893  | 1.019  | 0.7857 | 1.321 | 0.9747 |
| rs17875657 | IKKB     | intron        | 8 | 42248662  | -0.02344  | 0.01265  | -0.04752 | 0.00205   | -1.798  | 0.07227 | 0.6196 | 0.4677  | 0.4615  | 0.07631  | 0.7824  | 1.025  | 0.8594 | 1.223 | 0.9618 |
| rs17875669 | IKKB     | intron        | 8 | 42259706  | -0.02344  | 0.01265  | -0.04752 | 0.00205   | -1.798  | 0.07227 | 0.6196 | 0.4677  | 0.4615  | 0.07631  | 0.7824  | 1.025  | 0.8594 | 1.223 | 0.9618 |
| rs3211881  | IKKB     | intron        | 7 | 80126790  | 0.02163   | 0.02485  | -0.02707 | 0.07034   | 0.8706  | 0.384   | 0.875  | 0.05473 | 0.1866  | 5.436    | 0.01972 | 0.651  | 0.4528 | 0.936 | 0.8251 |
| rs3211885  | IKKB     | intron        | 7 | 80127338  | 0.001746  | 0.01323  | -0.02417 | 0.02767   | 0.132   | 0.895   | 0.9617 | 0.4129  | 0.4153  | 0.011    | 0.9165  | 0.9905 | 0.8265 | 1.184 | 0.9747 |
| rs2227631  | SERPINE1 | flanking_5UTR | 7 | 100556258 | 0.02866   | 0.01314  | 0.00902  | 0.05241   | 2.029   | 0.04256 | 0.4965 | 0.4316  | 0.4245  | 0.1021   | 0.7494  | 1.029  | 0.8618 | 1.23  | 0.9469 |
| rs2227657  | SERPINE1 | intron        | 7 | 100560179 | -0.005971 | 0.01879  | -0.04281 | 0.03086   | -0.3177 | 0.7507  | 0.9578 | 1.331   | 0.131   | 0.01939  | 0.8893  | 1.019  | 0.7857 | 1.321 | 0.9747 |
| rs17875657 | IKKB     | intron        | 8 | 42248662  | -0.02344  | 0.01265  | -0.04752 | 0.00205   | -1.798  | 0.07227 | 0.6196 | 0.4677  | 0.4615  | 0.07631  | 0.7824  | 1.025  | 0.8594 | 1.223 | 0.9618 |
| rs17875669 | IKKB     | intron        | 8 | 42259706  | -0.02344  | 0.01265  | -0.04752 | 0.00205   | -1.798  | 0.07227 | 0.6196 | 0.4677  | 0.4615  | 0.07631  | 0.7824  | 1.025  | 0.8594 | 1.223 | 0.9618 |
| rs3211881  | IKKB     | intron        | 7 | 80126790  | 0.02163   | 0.02485  | -0.02707 | 0.07034   | 0.8706  | 0.384   | 0.875  | 0.05473 | 0.1866  | 5.436    | 0.01972 | 0.651  | 0.4528 | 0.936 | 0.8251 |
| rs3211885  | IKKB     | intron        | 7 | 80127338  | 0.001746  | 0.01323  | -0.02417 | 0.02767   | 0.132   | 0.895   | 0.9617 | 0.4129  | 0.4153  | 0.011    | 0.9165  | 0.9905 | 0.8265 | 1.184 | 0.9747 |
| rs2227631  | SERPINE1 | flanking_5UTR | 7 | 100556258 | 0.02866   | 0.01314  | 0.00902  | 0.05241   | 2.029   | 0.04256 | 0.4965 | 0.4316  | 0.4245  | 0.1021   | 0.7494  | 1.029  | 0.8618 | 1.23  | 0.9469 |
| rs2227657  | SERPINE1 | intron        | 7 | 100560179 | -0.005971 | 0.01879  | -0.04281 | 0.03086   | -0.3177 | 0.7507  | 0.9578 | 1.331   | 0.131   | 0.01939  | 0.8893  | 1.019  | 0.7857 | 1.321 | 0.9747 |
| rs17875657 | IKKB     | intron        | 8 | 42248662  | -0.02344  | 0.01265  | -0.04752 | 0.00205   | -1.798  | 0.07227 | 0.6196 | 0.4677  | 0.4615  | 0.07631  | 0.7824  | 1.025  | 0.8594 | 1.223 | 0.9618 |
| rs17875669 | IKKB     | intron        | 8 | 42259706  | -0.02344  | 0.01265  | -0.04752 | 0.00205   | -1.798  | 0.07227 | 0.6196 | 0.4677  | 0.4615  | 0.07631  | 0.7824  | 1.025  | 0.8594 | 1.223 | 0.9618 |
| rs3211881  | IKKB     | intron        | 7 | 80126790  | 0.02163   | 0.0248   |          |           |         |         |        |         |         |          |         |        |        |       |        |

|            |        |               |    |           |           |         |           |           |          |         |        |          |          |        |        |        |        |        |
|------------|--------|---------------|----|-----------|-----------|---------|-----------|-----------|----------|---------|--------|----------|----------|--------|--------|--------|--------|--------|
| rs382891   | IL18   | intron        | 11 | 111519971 | -0.008936 | 0.01287 | -0.03416  | 0.4075    | 0.9107   | 0.4453  | 0.4284 | 0.5785   | 0.4649   | 1.0171 | 0.8972 | 1.279  | 0.889  |        |
| rs549908   | IL18   | coding        | 11 | 111526126 | -0.01174  | 0.01575 | -0.8372   | -0.4825   | 0.875    | 0.3117  | 0.3082 | 0.2933   | 0.8641   | 1.071  | 0.8406 | 1.23   | 0.9747 |        |
| rs5744256  | IL18   | intron        | 11 | 111528058 | 0.01806   | 0.01485 | -0.01405  | 0.04418   | 0.875    | 0.2301  | 0.2442 | 0.5447   | 0.4605   | 0.9249 | 0.7517 | 1.138  | 0.889  |        |
| rs2043055  | IL18   | intron        | 11 | 111536834 | -0.003116 | 0.01335 | -0.02928  | 0.02304   | 0.9579   | 0.3557  | 0.3582 | 0.01375  | 0.9066   | 0.9891 | 0.8231 | 1.188  | 0.9747 |        |
| rs1946519  | IL18   | flanking_5UTR | 11 | 111540717 | -0.01724  | 0.013   | -0.04272  | 0.008243  | 0.8154   | 0.4303  | 0.4114 | 0.7322   | 0.3922   | 1.081  | 0.9045 | 1.292  | 0.889  |        |
| rs8177352  | TIRAP  | intron        | 11 | 125659053 | 0.03355   | 0.01634 | 0.001516  | 0.06559   | 2.053    | 0.40017 | 0.1649 | 6.846    | 0.008882 | 1.348  | 1.077  | 1.687  | 0.8251 |        |
| rs595022   | TIRAP  | intron        | 11 | 125662189 | -0.02819  | 0.01472 | -0.002904 | 0.00066   | 0.5415   | 0.2388  | 0.272  | 2.849    | 0.09142  | 0.8396 | 0.6852 | 1.029  | 0.8251 |        |
| rs646005   | TIRAP  | intron        | 11 | 125664244 | 0.02897   | 0.0133  | 0.002904  | 0.00503   | 0.3918   | 0.3918  | 0.369  | 1.094    | 0.2955   | 1.101  | 0.9191 | 1.32   | 0.8667 |        |
| rs1893352  | TIRAP  | intron        | 11 | 125665897 | 0.05356   | 0.01785 | 0.01858   | 0.08854   | 3.001    | 0.00271 | 0.1364 | 3.335    | 0.06784  | 1.255  | 0.9831 | 1.603  | 0.8251 |        |
| rs625413   | TIRAP  | intron        | 11 | 125669559 | -0.01009  | 0.01562 | -0.04071  | 0.02052   | 0.5183   | 0.1654  | 0.1624 | 0.967    | 0.7567   | 0.967  | 0.7805 | 1.198  | 0.9498 |        |
| rs1786704  | TIRAP  | intron        | 11 | 125670967 | -0.03348  | 0.01578 | -0.06441  | -0.002548 | -2.121   | 0.03395 | 0.2027 | 0.6558   | 0.4181   | 0.9144 | 0.7362 | 1.136  | 0.889  |        |
| rs8177382  | TIRAP  | intron        | 11 | 125671678 | 0.005632  | 0.01876 | -0.003113 | 0.04239   | 0.3003   | 0.764   | 0.1306 | 0.01591  | 0.9896   | 0.9834 | 0.7579 | 1.276  | 0.9747 |        |
| rs1149576  | TIRAP  | intron        | 12 | 6319376   | -0.003095 | 0.0131  | -0.02878  | 0.02259   | -2.362   | 0.8133  | 0.9579 | 0.4129   | 0.4043   | 0.927  | 0.7756 | 1.108  | 0.889  |        |
| rs4149575  | TIRAP  | intron        | 12 | 6319471   | -0.001162 | 0.02375 | -0.04817  | 0.04494   | -0.06786 | 0.9459  | 0.9766 | 0.06965  | 0.4892   | 0.8873 | 0.6321 | 1.245  | 0.8947 |        |
| rs4149570  | TIRAP  | intron        | 12 | 6321851   | 1.53E-05  | 0.01319 | -0.02808  | 0.02587   | 0.001159 | 0.8991  | 0.3906 | 0.6989   | 0.4031   | 1.08   | 0.9021 | 1.292  | 0.889  |        |
| rs4251513  | IRAK4  | intron        | 12 | 42460471  | -0.00331  | 0.01264 | -0.02584  | 0.02146   | -0.2619  | 0.7934  | 0.9591 | 0.4925   | 0.5901   | 0.9528 | 0.799  | 1.136  | 0.8995 |        |
| rs4251520  | IRAK4  | intron        | 12 | 42461605  | -0.01629  | 0.01705 | -0.05993  | 0.01969   | -0.9905  | 0.322   | 0.875  | 1.107    | 0.4276   | 0.5132 | 1.1    | 0.8273 | 1.461  | 0.8947 |
| rs4251535  | IRAK4  | intron        | 12 | 42465477  | -0.02242  | 0.02395 | -0.06937  | 0.02453   | -0.9358  | 0.3494  | 0.875  | 1.334    | 0.248    | 1.219  | 0.8708 | 1.706  | 0.8667 |        |
| rs4251545  | IRAK4  | coding        | 12 | 42466562  | -0.02112  | 0.02169 | -0.06364  | 0.0214    | -0.9735  | 0.3304  | 0.875  | 0.9826   | 0.5338   | 1.1    | 0.8148 | 1.485  | 0.8947 |        |
| rs17695156 | SP1    | 3UTR          | 12 | 52092922  | 0.004183  | 0.02489 | -0.0446   | 0.05296   | 0.1681   | 0.8665  | 0.959  | 1.165    | 0.2803   | 0.8275 | 0.5865 | 1.167  | 0.8667 |        |
| rs10787450 | SP1    | flanking_3UTR | 12 | 52097301  | -0.01629  | 0.01705 | -0.0497   | 0.01713   | -0.9554  | 0.3394  | 0.9344 | 0.6275   | 0.6275   | 0.9425 | 0.7419 | 1.197  | 0.9278 |        |
| rs2069727  | IFNG   | flanking_3UTR | 12 | 68834490  | -0.006557 | 0.01267 | -0.03138  | 0.01827   | -0.5176  | 0.6048  | 0.9344 | 0.4677   | 0.5829   | 0.9518 | 0.7961 | 1.135  | 0.8995 |        |
| rs1861494  | IFNG   | intron        | 12 | 68837676  | -0.005533 | 0.01421 | -0.03318  | 0.02252   | -0.3753  | 0.9461  | 0.2666 | 0.3643   | 0.5461   | 1.063  | 0.8724 | 1.294  | 0.8966 |        |
| rs10787450 | IFNG   | flanking_5UTR | 12 | 68840555  | -0.002774 | 0.02664 | -0.05499  | 0.04944   | -0.1041  | 0.9171  | 0.9667 | 0.9131   | 0.9131   | 1.019  | 0.7246 | 1.433  | 0.9747 |        |
| rs2228315  | SELP2  | coding        | 12 | 107546245 | -0.03205  | 0.02397 | -0.07902  | 0.01493   | -1.337   | 0.7365  | 0.6867 | 0.3996   | 0.5273   | 1.115  | 0.7951 | 1.564  | 0.8947 |        |
| rs1738370  | SELP2  | intron        | 12 | 107546257 | -0.02722  | 0.01343 | -0.05353  | -0.000907 | -2.02    | 0.4268  | 0.2943 | 1.601    | 0.2057   | 1.131  | 0.9347 | 1.368  | 0.8387 |        |
| rs9464269  | SELP2  | intron        | 12 | 107546929 | 0.018     | 0.01319 | -0.00786  | 0.03681   | 1.364    | 0.1727  | 0.7365 | 0.4824   | 0.4873   | 0.9395 | 0.7877 | 1.121  | 0.8947 |        |
| rs8179121  | SELP2  | intron        | 12 | 107548245 | 0.01868   | 0.01626 | -0.01319  | 0.05054   | 0.2508   | 0.8251  | 0.1972 | 0.4308   | 0.9135   | 0.9135 | 0.7293 | 1.144  | 0.889  |        |
| rs1879151  | SELP2  | intron        | 12 | 107549561 | 0.008716  | 0.01282 | -0.02827  | 0.03879   | 0.4653   | 0.6417  | 0.9344 | 0.2425   | 0.7146   | 0.9626 | 0.7846 | 1.181  | 0.943  |        |
| rs8179107  | SELP2  | flanking_5UTR | 12 | 107552277 | -0.0356   | 0.02062 | -0.07602  | 0.004818  | -1.726   | 0.08437 | 0.6537 | 1.462    | 0.2267   | 0.8357 | 0.6246 | 1.118  | 0.8447 |        |
| rs17844115 | SELP2  | flanking_5UTR | 12 | 107552470 | 0.01774   | 0.02211 | -0.02558  | 0.06107   | 0.8026   | 0.4222  | 0.8766 | 0.09978  | 0.9114   | 1.018  | 0.7486 | 1.383  | 0.9747 |        |
| rs1169288  | TCF1   | coding        | 12 | 119901033 | 0.003485  | 0.01345 | -0.02589  | 0.02986   | 0.2591   | 0.7956  | 0.9579 | 0.3433   | 0.6742   | 1.041  | 0.8643 | 1.253  | 0.9368 |        |
| rs1169286  | TCF1   | intron        | 12 | 119903439 | 0.008716  | 0.01282 | -0.0164   | 0.03383   | 0.6802   | 0.4964  | 0.9107 | 0.1095   | 0.7407   | 0.9705 | 0.8128 | 1.577  | 0.9229 |        |
| rs1169303  | TCF1   | intron        | 12 | 119903928 | -0.03821  | 0.02418 | -0.0856   | 0.009174  | -1.581   | 0.1141  | 0.4789 | 0.04851  | 0.9029   | 0.9798 | 0.7053 | 1.361  | 0.9747 |        |
| rs12427353 | TCF1   | intron        | 12 | 119911284 | -0.002847 | 0.01621 | -0.03461  | 0.02892   | -0.1757  | 0.8605  | 0.959  | 1.557    | 0.2121   | 1.146  | 0.925  | 1.42   | 0.8397 |        |
| rs2071190  | TCF1   | intron        | 12 | 119915655 | 0.01512   | 0.01522 | -0.01471  | 0.04495   | 0.9936   | 0.3205  | 0.2114 | 0.3174   | 0.5732   | 0.9403 | 0.7592 | 1.165  | 0.8995 |        |
| rs464196   | TCF1   | coding        | 12 | 119919810 | 0.01093   | 0.0138  | -0.01612  | 0.03799   | 0.7921   | 0.4284  | 0.3172 | 0.09739  | 0.755    | 1.031  | 0.8527 | 1.246  | 0.9477 |        |
| rs17844075 | TCF1   | intron        | 12 | 119920759 | 0.01865   | 0.01305 | -0.00693  | 0.04424   | 1.429    | 0.1531  | 0.7349 | 0.3831   | 0.4052   | 1.018  | 0.9114 | 1.091  | 0.8833 |        |
| rs1169310  | TCF1   | 3UTR          | 12 | 119923816 | 0.005382  | 0.01326 | -0.02061  | 0.03138   | 0.4058   | 0.6849  | 0.9344 | 0.8264   | 0.3633   | 1.091  | 0.9045 | 1.315  | 0.889  |        |
| rs17844131 | CPB2   | intron        | 13 | 45531053  | -0.04476  | 0.02655 | -0.09676  | 0.007235  | -1.687   | 0.09163 | 0.6537 | 0.1665   | 0.6832   | 0.9628 | 0.8024 | 1.155  | 0.9392 |        |
| rs17844115 | CPB2   | coding        | 13 | 45536827  | -0.02381  | 0.02672 | -0.07618  | 0.02856   | -0.891   | 0.373   | 0.875  | 0.06468  | 0.6191   | 1.097  | 0.7625 | 1.577  | 0.9229 |        |
| rs17844075 | CPB2   | intron        | 13 | 45543546  | 0.01865   | 0.01305 | -0.00693  | 0.04424   | 1.429    | 0.1531  | 0.7349 | 0.3831   | 0.4052   | 1.018  | 0.9114 | 1.091  | 0.8833 |        |
| rs17844070 | CPB2   | intron        | 13 | 45546524  | -0.004878 | 0.01352 | -0.03138  | 0.02162   | -0.3609  | 0.7182  | 0.9467 | 0.3383   | 0.3192   | 0.8264 | 0.9045 | 1.315  | 0.889  |        |
| rs17844008 | CPB2   | intron        | 13 | 45566112  | -0.01772  | 0.01434 | -0.04583  | 0.0104    | -1.235   | 0.2168  | 0.7605 | 0.2756   | 0.7833   | 1.028  | 0.8438 | 1.253  | 0.9618 |        |
| rs17844000 | CPB2   | intron        | 13 | 45568992  | 0.02083   | 0.01484 | -0.00824  | 0.04991   | 1.404    | 0.1604  | 0.7365 | 0.2387   | 0.2701   | 0.8474 | 0.6912 | 1.039  | 0.8251 |        |
| rs17843994 | CPB2   | intron        | 13 | 45571318  | -0.001191 | 0.0129  | -0.02647  | 0.02409   | -0.09231 | 0.9265  | 0.9667 | 2.247    | 0.1338   | 1.144  | 0.9594 | 1.365  | 0.8251 |        |
| rs17843986 | CPB2   | intron        | 13 | 45574196  | -0.01737  | 0.01311 | -0.04307  | 0.008334  | -1.324   | 0.1854  | 0.7365 | 0.3968   | 0.9941   | 1.001  | 0.836  | 1.198  | 0.996  |        |
| rs17843981 | CPB2   | intron        | 13 | 45577040  | 0.000663  | 0.01935 | -0.03726  | 0.03859   | 0.9372   | 0.9883  | 1.281  | 0.004381 | 0.9472   | 1.009  | 0.7752 | 1.313  | 0.9752 |        |
| rs1336055  | NFKBIA | flanking_3UTR | 14 | 34940205  | 0.01249   | 0.01441 | -0.01575  | 0.04073   | 0.8668   | 0.3861  | 0.875  | 0.2789   | 0.9958   | 0.9669 | 0.8183 | 1.212  | 0.9862 |        |
| rs19157106 | NFKBIA | coding        | 14 | 34943521  | -0.007755 | 0.01412 | -0.03542  | 0.01991   | -0.5494  | 0.9328  | 0.299  | 0.2749   | 0.6001   | 1.053  | 0.8678 | 1.278  | 0.9058 |        |
| rs2333409  | NFKBIA | flanking_5UTR | 14 | 34944021  | -0.01308  | 0.01505 | -0.04258  | 0.01643   | -0.8687  | 0.3851  | 0.875  | 0.2269   | 0.6414   | 1.051  | 0.853  | 1.294  | 0.9278 |        |
| rs3136053  | NFKBIA | flanking_5UTR | 14 | 34944605  | -0.0188   | 0.01427 | -0.04678  | 0.009172  | -1.317   | 0.1878  | 0.7365 | 0.2866   | 0.961    | 0.9872 | 0.8131 | 1.198  | 0.9747 |        |
| rs936213   | PLCB2  | intron        | 15 | 38366637  | -0.006884 | 0.01414 | -0.0344   | 0.02103   | -0.4728  | 0.6394  | 0.9344 | 1.807    | 0.1788   | 0.8759 | 0.722  | 1.063  | 0.8251 |        |
| rs12439272 | PLCB2  | intron        | 15 | 38372096  | 0.008314  | 0.01587 | -0.02279  | 0.03941   | 0.5239   | 0.6004  | 0.9344 | 0.1978   | 0.4133   | 0.9128 | 0.7336 | 1.136  | 0.889  |        |
| rs2305650  | PLCB2  | intron        | 15 | 38376510  | -0.007759 | 0.016   | -0.03912  | 0.02361   | -0.4849  | 0.6278  | 0.9344 | 0.2105   | 0.1555   | 0.9772 | 0.7823 | 1.205  | 0.9618 |        |
| rs1869901  | PLCB2  | intron        | 15 | 38382919  | 0.003631  | 0.01311 | -0.02205  | 0.02932   | 0.2771   | 0.7817  | 0.9578 | 1.091    | 0.2962   | 1.1    | 0.9197 | 1.316  | 0.8667 |        |
| rs1123487  | PLCB2  | intron        | 15 | 38386233  | -0.00325  | 0.01364 | -0.02998  | 0.02348   | -0.2384  | 0.8116  | 0.9579 | 1.713    | 0.1907   | 1.133  | 0.9399 | 1.365  | 0.8251 |        |
| rs13329646 | SELS   | flanking_3UTR | 15 | 99627106  | 0.03139   | 0.01853 | -0.00491  | 0.06771   | 1.695    | 0.09023 | 0.5537 | 1.464    | 0.2263   | 0.8501 | 0.6534 | 1.106  | 0.8447 |        |
| rs4965814  | SELS   | intron        | 15 | 99631440  | 0.02427   | 0.01697 | -0.00899  | 0.05754   | 1.43     | 0.1527  | 0.7349 | 0.1517   | 0.3267   | 0.6961 | 0.8662 | 1.128  | 0.889  |        |
| rs3024537  | IL4R   | intron        | 16 | 27260320  | -0.002178 | 0.01828 | -0.038    | 0.03364   | -0.1192  | 0.9052  | 0.9667 | 0.689    | 0.4065   | 1.111  | 0.8664 | 1.425  | 0.889  |        |
| rs3024548  | IL4R   | intron        | 16 | 27262032  | -0.005726 | 0.01304 | -0.03129  | 0.01983   | -0.4391  | 0.6606  | 0.9344 | 0.4453   | 0.678    | 0.9632 | 0.8071 | 1.15   | 0.9374 |        |
| rs3024576  | IL4R   | intron        | 16 | 27265691  | 0.0213    | 0.02217 | -0.02214  | 0.06475   | 0.961    | 0.3366  | 0.875  | 0.08603  | 0.423    | 1.14   | 0.8272 | 1.571  | 0.889  |        |

|            |        |               |    |           |           |         |           |           |          |          |        |         |         |         |          |          |         |        |        |        |
|------------|--------|---------------|----|-----------|-----------|---------|-----------|-----------|----------|----------|--------|---------|---------|---------|----------|----------|---------|--------|--------|--------|
| rs22393345 | IL4R   | intron        | 16 | 27269294  | 0.02042   | 0.02355 | -0.02574  | 0.06658   | 0.867    | 0.386    | 0.875  | 0.5062  | 0.05711 | 0.08025 | 0.06688  | 0.7959   | 0.9577  | 0.6902 | 1.329  | 0.9636 |
| rs3024610  | IL4R   | intron        | 16 | 27271659  | -0.005664 | 0.01312 | -0.03127  | 0.02614   | -0.4242  | 0.8614   | 0.9344 | 0.5062  | 0.05711 | 0.08025 | 0.06688  | 0.7959   | 0.9577  | 0.6902 | 1.329  | 0.9636 |
| rs3024612  | IL4R   | intron        | 16 | 27271646  | -0.00164  | 0.02782 | -0.05617  | 0.05288   | -0.06886 | 0.953    | 0.9797 | 0.05957 | 0.05957 | 0.05316 | 0.06688  | 0.7959   | 0.9577  | 0.6902 | 1.329  | 0.9636 |
| rs3024622  | IL4R   | intron        | 16 | 27272954  | -0.01367  | 0.01372 | -0.04057  | 0.01323   | -0.9962  | 0.3192   | 0.875  | 0.3595  | 0.3595  | 0.3629  | 0.02506  | 0.06688  | 0.7959  | 0.9577 | 0.6902 | 1.329  |
| rs3024634  | IL4R   | intron        | 16 | 27274063  | 0.01265   | 0.01839 | -0.0234   | 0.0487    | 0.6877   | 0.4917   | 0.9107 | 0.1455  | 0.1455  | 0.1225  | 2.308    | 0.06688  | 0.7959  | 0.9577 | 0.6902 | 1.329  |
| rs3024656  | IL4R   | intron        | 16 | 27277110  | 0.01144   | 0.01403 | -0.01606  | 0.03894   | 0.8153   | 0.415    | 0.8766 | 0.3067  | 0.3067  | 0.3086  | 0.008471 | 0.06688  | 0.7959  | 0.9577 | 0.6902 | 1.329  |
| rs8674     | IL4R   | 3UTR          | 16 | 27283390  | 0.03202   | 0.02842 | -0.02369  | 0.08772   | 1.127    | 0.26     | 0.8363 | 0.04975 | 0.04975 | 0.3086  | 0.04239  | 0.06688  | 0.7959  | 0.9577 | 0.6902 | 1.329  |
| rs1029489  | IL4R   | flanking_3UTR | 16 | 27283378  | -0.007149 | 0.01324 | -0.0331   | 0.0188    | -0.54    | 0.5893   | 0.9344 | 0.3853  | 0.3853  | 0.402   | 0.04239  | 0.06688  | 0.7959  | 0.9577 | 0.6902 | 1.329  |
| rs17861940 | CCL2   | flanking_5UTR | 17 | 29602471  | -0.02549  | 0.01687 | -0.05855  | 0.007578  | -1.511   | 0.1309   | 0.7105 | 0.1754  | 0.1754  | 0.1991  | 1.811    | 0.06688  | 0.7959  | 0.9577 | 0.6902 | 1.329  |
| rs3917878  | CCL2   | flanking_5UTR | 17 | 29602968  | 0.06668   | 0.02357 | 0.02048   | 0.1129    | 2.829    | 0.004692 | 0.2238 | 0.07331 | 0.07331 | 0.0755  | 0.02297  | 0.06688  | 0.7959  | 0.9577 | 0.6902 | 1.329  |
| rs1024610  | CCL2   | flanking_5UTR | 17 | 29604344  | -0.002504 | 0.01586 | -0.03358  | 0.02858   | -0.1579  | 0.8746   | 0.9617 | 0.209   | 0.209   | 0.2072  | 0.00885  | 0.06688  | 0.7959  | 0.9577 | 0.6902 | 1.329  |
| rs3760396  | CCL2   | flanking_5UTR | 17 | 29605554  | 0.003687  | 0.01555 | -0.02679  | 0.03417   | 0.2371   | 0.8126   | 0.9579 | 0.1928  | 0.1928  | 0.2227  | 2.658    | 0.06688  | 0.7959  | 0.9577 | 0.6902 | 1.329  |
| rs2857656  | CCL2   | flanking_5UTR | 17 | 29606120  | -0.001561 | 0.01438 | -0.02971  | 0.02667   | -0.1057  | 0.9158   | 0.9667 | 0.2985  | 0.2985  | 5.284   | 0.02153  | 0.06688  | 0.7959  | 0.9577 | 0.6902 | 1.329  |
| rs4586     | CCL2   | coding        | 17 | 29607382  | 0.02152   | 0.01326 | -0.00447  | 0.04751   | 1.623    | 0.1047   | 0.6679 | 0.3769  | 0.3769  | 0.3313  | 4.543    | 0.03306  | 0.06688 | 0.7959 | 0.9577 | 0.6902 |
| rs3917900  | CCL2   | flanking_3UTR | 17 | 29611427  | -0.01637  | 0.01321 | -0.04227  | 0.00952   | -1.239   | 0.2153   | 0.7605 | 0.3794  | 0.3794  | 0.4029  | 1.156    | 0.2824   | 0.9057  | 0.7561 | 1.085  | 0.8667 |
| rs17860431 | STAT3  | intron        | 17 | 37723124  | -0.03786  | 0.01592 | -0.06885  | -0.006466 | -2.366   | 0.102    | 0.3581 | 0.2002  | 0.2002  | 0.2065  | 1.184    | 0.7308   | 0.9623  | 0.7732 | 1.198  | 0.943  |
| rs17879180 | STAT3  | intron        | 17 | 37730193  | -0.007231 | 0.02399 | -0.05424  | 0.03978   | -0.3014  | 0.7631   | 0.9578 | 0.08458 | 0.08458 | 0.07407 | 0.7603   | 0.3832   | 1.155   | 0.8353 | 1.597  | 0.889  |
| rs17861762 | STAT3  | intron        | 17 | 37745206  | 0.01551   | 0.02464 | -0.03279  | 0.0638    | 0.6293   | 0.5292   | 0.9107 | 0.05597 | 0.05597 | 0.07165 | 1.99     | 0.1594   | 0.7682  | 0.532  | 1.109  | 0.8251 |
| rs17881519 | STAT3  | intron        | 17 | 37753059  | -0.02189  | 0.01366 | -0.04866  | 0.00489   | -1.602   | 0.1092   | 0.6679 | 0.3516  | 0.3516  | 0.3282  | 1.217    | 0.2699   | 1.111   | 0.9221 | 1.336  | 0.8667 |
| rs2306581  | STAT3  | intron        | 17 | 37753791  | -0.02193  | 0.01341 | -0.0482   | 0.004348  | -1.636   | 0.102    | 0.6679 | 0.342   | 0.342   | 0.3451  | 0.02123  | 0.8841   | 0.9863  | 0.8195 | 1.187  | 0.9747 |
| rs1029489  | STAT3  | flanking_5UTR | 17 | 37795736  | -0.02725  | 0.01461 | -0.05587  | 0.001378  | -1.866   | 0.06217  | 0.5814 | 0.26    | 0.26    | 0.2508  | 0.2204   | 0.6387   | 1.049   | 0.8579 | 1.284  | 0.9278 |
| rs4969168  | SOCS3  | 3UTR          | 17 | 73865388  | 0.0393    | 0.01856 | -0.002925 | 0.07569   | 2.118    | 0.03428  | 0.4572 | 0.143   | 0.143   | 0.1474  | 0.07514  | 0.784    | 0.9656  | 0.7519 | 1.24   | 0.9618 |
| rs11569562 | C3     | intron        | 19 | 6629753   | -0.009955 | 0.01344 | -0.03551  | 0.0156    | -0.7634  | 0.4452   | 0.8766 | 0.4975  | 0.4975  | 0.52    | 1.008    | 0.3155   | 0.9138  | 0.7664 | 1.09   | 0.8833 |
| rs11569561 | C3     | intron        | 19 | 6629871   | 0.006896  | 0.01544 | -0.02357  | 0.03697   | 0.4336   | 0.6646   | 0.9344 | 0.2351  | 0.2351  | 0.2149  | 1.162    | 0.281    | 1.122   | 0.9088 | 1.385  | 0.8667 |
| rs3445455  | C3     | intron        | 19 | 6630360   | -0.008106 | 0.01533 | -0.03791  | 0.02195   | -0.5287  | 0.5971   | 0.9344 | 0.2239  | 0.2239  | 0.2392  | 0.6507   | 0.4199   | 0.9175  | 0.7443 | 1.131  | 0.889  |
| rs7951     | C3     | coding        | 19 | 6632991   | -0.03066  | 0.02412 | -0.07816  | 0.01662   | -1.271   | 0.2038   | 0.7365 | 0.08955 | 0.08955 | 0.09168 | 0.0272   | 0.869    | 0.9745  | 0.717  | 1.324  | 0.9747 |
| rs11569550 | C3     | intron        | 19 | 6633953   | -0.004072 | 0.01353 | -0.03058  | 0.02244   | -0.301   | 0.7634   | 0.9578 | 0.3371  | 0.3371  | 0.3696  | 2.288    | 0.1304   | 0.8672  | 0.721  | 1.043  | 0.8251 |
| rs1398623  | C3     | intron        | 19 | 6635197   | -0.01553  | 0.02008 | -0.05489  | 0.02384   | -0.7732  | 0.4395   | 0.8766 | 0.1397  | 0.1397  | 0.1325  | 0.216    | 0.6421   | 1.063   | 0.8225 | 1.373  | 0.9278 |
| rs2241394  | C3     | intron        | 19 | 6636230   | -0.01083  | 0.01921 | -0.04849  | 0.02883   | -0.5636  | 0.5731   | 0.9344 | 0.1231  | 0.1231  | 0.1333  | 0.4538   | 0.5005   | 0.9132  | 0.7011 | 1.189  | 0.8947 |
| rs344548   | C3     | intron        | 19 | 6636817   | -0.01377  | 0.01735 | -0.04778  | 0.02024   | -0.7936  | 0.4275   | 0.8766 | 0.1671  | 0.1671  | 0.1705  | 0.04176  | 0.8381   | 0.9758  | 0.7712 | 1.235  | 0.9727 |
| rs2241392  | C3     | intron        | 19 | 6636983   | 0.003756  | 0.01347 | -0.02265  | 0.03017   | 0.2788   | 0.7804   | 0.9578 | 0.3632  | 0.3632  | 0.3659  | 0.01636  | 0.8982   | 0.9881  | 0.8231 | 1.186  | 0.9747 |
| rs11569536 | C3     | intron        | 19 | 6637069   | -0.03838  | 0.02644 | -0.08021  | 0.01344   | -1.452   | 0.1467   | 0.7289 | 0.06716 | 0.06716 | 0.06636 | 0.005182 | 0.9426   | 1.013   | 0.7122 | 1.441  | 0.9752 |
| rs344544   | C3     | intron        | 19 | 6638148   | 0.005452  | 0.01859 | -0.03099  | 0.04189   | 0.2932   | 0.7694   | 0.9578 | 0.1306  | 0.1306  | 0.1433  | 0.001433 | 0.4126   | 0.8467  | 0.6943 | 1.162  | 0.889  |
| rs344540   | C3     | intron        | 19 | 6638768   | -0.008746 | 0.01347 | -0.03514  | 0.01765   | -0.6494  | 0.5161   | 0.9107 | 0.2307  | 0.2307  | 0.3636  | 0.6704   | 0.9833   | 0.998   | 0.8312 | 1.198  | 0.9916 |
| rs11569514 | C3     | intron        | 19 | 6641276   | -0.005334 | 0.01898 | -0.04254  | 0.03187   | -0.281   | 0.7787   | 0.9578 | 0.1256  | 0.1256  | 0.1371  | 0.5716   | 0.4496   | 0.904   | 0.6958 | 1.174  | 0.889  |
| rs641461   | C3     | intron        | 19 | 6641461   | -0.00514  | 0.01283 | -0.03028  | 0.02      | -0.4007  | 0.6887   | 0.9359 | 0.4291  | 0.4291  | 0.4144  | 0.4433   | 0.5055   | 1.062   | 0.8891 | 1.269  | 0.8947 |
| rs3475958  | C3     | intron        | 19 | 6641613   | -0.03463  | 0.02123 | -0.07624  | 0.008994  | -1.631   | 0.1031   | 0.6679 | 0.1234  | 0.1234  | 0.1148  | 0.3561   | 0.5507   | 1.086   | 0.8282 | 1.424  | 0.8995 |
| rs8112351  | C3     | intron        | 19 | 6652298   | -0.01421  | 0.01528 | -0.04416  | 0.01574   | -0.9299  | 0.3525   | 0.875  | 0.2948  | 0.2948  | 0.2333  | 2.929    | 0.08702  | 0.8467  | 0.6997 | 1.025  | 0.8251 |
| rs11569411 | C3     | intron        | 19 | 6657480   | 0.002867  | 0.01612 | -0.02872  | 0.03446   | 0.1779   | 0.8588   | 0.959  | 0.1958  | 0.1958  | 0.1775  | 1.102    | 0.2939   | 1.128   | 0.9006 | 1.413  | 0.9747 |
| rs10411506 | C3     | intron        | 19 | 6661948   | 0.01037   | 0.01886 | -0.02659  | 0.04732   | 0.5499   | 0.5824   | 0.9328 | 0.1132  | 0.1132  | 0.1502  | 5.797    | 0.01606  | 0.7219  | 0.5533 | 0.942  | 0.8251 |
| rs4807895  | C3     | intron        | 19 | 6662958   | -0.01695  | 0.01386 | -0.04411  | 0.01021   | -1.223   | 0.2213   | 0.7649 | 0.2948  | 0.2948  | 0.3305  | 2.929    | 0.08702  | 0.8467  | 0.6997 | 1.025  | 0.8251 |
| rs11569411 | C3     | intron        | 19 | 6669042   | 0.007235  | 0.02149 | -0.03489  | 0.04936   | 0.3366   | 0.7364   | 0.955  | 0.09701 | 0.09701 | 0.1094  | 0.8126   | 0.3674   | 0.8746  | 0.6535 | 1.171  | 0.889  |
| rs2230199  | C3     | coding        | 19 | 6669387   | 0.003055  | 0.01613 | -0.02856  | 0.03467   | 0.1894   | 0.8498   | 0.959  | 0.2251  | 0.2251  | 0.2003  | 1.844    | 0.1745   | 1.16    | 0.9363 | 1.437  | 0.8251 |
| rs22506656 | C3     | intron        | 19 | 6669584   | 0.006081  | 0.01431 | -0.02196  | 0.03412   | 0.4251   | 0.8708   | 0.9344 | 0.2935  | 0.2935  | 0.2689  | 1.503    | 0.2202   | 1.13    | 0.9295 | 1.373  | 0.8404 |
| rs3030390  | ICAM1  | intron        | 19 | 10243537  | -0.00544  | 0.02355 | -0.05159  | 0.04071   | -0.231   | 0.8173   | 0.9579 | 0.1032  | 0.1032  | 0.07011 | 7.175    | 0.007391 | 1.527   | 1.118  | 2.085  | 0.8251 |
| rs281432   | ICAM1  | intron        | 19 | 10251658  | 0.01773   | 0.01264 | -0.00704  | 0.0425    | 1.403    | 0.1607   | 0.7365 | 0.4913  | 0.4913  | 0.4538  | 2.807    | 0.09386  | 1.163   | 0.9747 | 1.387  | 0.8251 |
| rs5496     | ICAM1  | coding        | 19 | 10256683  | -0.02489  | 0.01287 | -0.05011  | 0.000329  | -1.934   | 0.05314  | 0.5393 | 0.4129  | 0.4129  | 0.4421  | 1.724    | 0.1891   | 0.8875  | 0.7427 | 1.061  | 0.8251 |
| rs3093032  | ICAM1  | 3UTR          | 19 | 10257336  | -0.01587  | 0.01864 | -0.05241  | 0.02067   | -0.8511  | 0.3948   | 0.875  | 0.1455  | 0.1455  | 0.1294  | 1.097    | 0.2949   | 1.146   | 0.8883 | 1.477  | 0.8667 |
| rs11086028 | KLFE2  | flanking_5UTR | 19 | 16295454  | 0.004392  | 0.01307 | -0.02122  | 0.03      | -0.3361  | 0.7368   | 0.955  | 0.4389  | 0.4389  | 0.4537  | 0.4389   | 0.5077   | 0.9419  | 0.7889 | 1.124  | 0.8947 |
| rs4251938  | KLFE2  | flanking_3UTR | 19 | 16300498  | -0.005874 | 0.01552 | -0.0363   | 0.02455   | -0.3784  | 0.7052   | 0.9461 | 0.2164  | 0.2164  | 0.2288  | 4.388    | 0.5077   | 0.9309  | 0.753  | 1.151  | 0.8947 |
| rs2273356  | F2RL3  | UTR           | 19 | 168644071 | -0.001287 | 0.0135  | -0.02774  | 0.02517   | -0.09535 | 0.924    | 0.9667 | 0.3259  | 0.3259  | 0.3596  | 2.488    | 0.1147   | 0.861   | 0.7148 | 1.037  | 0.8251 |
| rs17884196 | NFKB1B | intron        | 19 | 44082771  | -0.001    | 0.01318 | -0.02683  | 0.02483   | -0.07587 | 0.9395   | 0.9721 | 0.3632  | 0.3632  | 0.3498  | 3.903    | 0.5322   | 1.06    | 0.8825 | 1.274  | 0.8947 |
| rs12979755 | NFKB1B | intron        | 19 | 44083657  | -0.002234 | 0.01319 | -0.02808  | 0.02361   | -0.1694  | 0.8655   | 0.959  | 0.3853  | 0.3853  | 0.4153  | 1.849    | 0.1739   | 0.8826  | 0.7372 | 1.057  | 0.8251 |
| rs4251938  | PLAUR  | intron        | 19 | 48843461  | 0.007513  | 0.01968 | -0.03105  | 0.04608   | 0.3818   | 0.7026   |        |         |         |         |          |          |         |        |        |        |

|            |       |               |    |           |           |         |           |           |          |         |        |         |         |           |         |        |        |        |        |
|------------|-------|---------------|----|-----------|-----------|---------|-----------|-----------|----------|---------|--------|---------|---------|-----------|---------|--------|--------|--------|--------|
| rs4251854  | PLAUR | intron        | 19 | 48855834  | 0.000637  | 0.0201  | -0.0377   | 0.4004    | 0.03171  | 0.9747  | 0.9883 | 0.1032  | 0.1156  | 0.7656    | 0.3816  | 0.881  | 0.6633 | 1.17   | 0.889  |
| rs2239374  | PLAUR | intron        | 19 | 48860121  | 0.02023   | 0.01649 | -0.01209  | 0.05255   | 1.227    | 0.22    | 0.7649 | 0.1903  | 0.1926  | 0.01703   | 0.8962  | 0.862  | 0.7877 | 1.232  | 0.9747 |
| rs4251831  | PLAUR | intron        | 19 | 48861578  | -0.01109  | 0.01414 | -0.0388   | 0.01661   | -0.7846  | 0.4327  | 0.8766 | 0.2935  | 0.3071  | 0.4333    | 0.5104  | 0.9375 | 0.7735 | 1.136  | 0.8947 |
| rs2286960  | PLAUR | intron        | 19 | 48863865  | 0.006807  | 0.01497 | -0.02253  | 0.03615   | 0.4547   | 0.6493  | 0.9344 | 0.2587  | 0.2442  | 0.5559    | 0.4559  | 1.08   | 0.8822 | 1.322  | 0.889  |
| rs344782   | PLAUR | intron        | 19 | 48864730  | 0.009784  | 0.01271 | -0.01512  | 0.03469   | 0.7699   | 0.4414  | 0.8766 | 0.4689  | 0.4569  | 0.9344    | 0.5902  | 1.05   | 0.8799 | 1.252  | 0.8995 |
| rs344781   | PLAUR | flanking_5UTR | 19 | 48866628  | 0.005631  | 0.01522 | -0.02419  | 0.03546   | 0.3701   | 0.7113  | 0.9461 | 0.2114  | 0.2119  | 0.0005288 | 0.9817  | 0.9975 | 0.8042 | 1.237  | 0.9916 |
| rs2425640  | HNF4A | intron        | 20 | 42461451  | 0.002123  | 0.01356 | -0.02444  | 0.02869   | 0.1566   | 0.8756  | 0.9617 | 0.3164  | 0.3513  | 2.399     | 0.1214  | 0.8626 | 0.7154 | 1.04   | 0.8251 |
| rs2071197  | HNF4A | intron        | 20 | 42463849  | 0.03441   | 0.0213  | -0.00733  | 0.07615   | 1.615    | 0.1063  | 0.6679 | 0.1009  | 0.1009  | 0.03924   | 0.843   | 0.9707 | 0.7233 | 1.303  | 0.9733 |
| rs2071200  | HNF4A | intron        | 20 | 42464370  | -0.02242  | 0.01825 | -0.05216  | 0.007306  | -1.478   | 0.1394  | 0.715  | 0.1965  | 0.245   | 6.66      | 0.00986 | 0.7537 | 0.6079 | 0.9346 | 0.8251 |
| rs3212180  | HNF4A | intron        | 20 | 42467927  | -0.03014  | 0.01505 | -0.05964  | -0.006631 | -2.002   | 0.04536 | 0.5001 | 0.2743  | 0.245   | 2.237     | 0.1348  | 1.165  | 0.9536 | 1.423  | 0.8251 |
| rs745975   | HNF4A | intron        | 20 | 42468107  | 0.02553   | 0.01303 | -5.28E-06 | 0.05706   | 1        | 0.05012 | 0.5197 | 0.4229  | 0.4052  | 0.6382    | 0.4244  | 1.075  | 0.8997 | 1.286  | 0.889  |
| rs3212184  | HNF4A | intron        | 20 | 42468574  | 0.003585  | 0.01028 | -0.02148  | 0.02867   | 0.2809   | 0.7788  | 0.9578 | 0.4067  | 0.4106  | 0.03148   | 0.9402  | 1.007  | 0.8431 | 1.202  | 0.9749 |
| rs3212199  | HNF4A | intron        | 20 | 42471622  | 0.01663   | 0.01577 | -0.01427  | 0.04753   | 1.055    | 0.2915  | 0.8692 | 0.1978  | 0.1995  | 0.009836  | 0.921   | 0.9869 | 0.7932 | 1.233  | 0.9747 |
| rs1885088  | HNF4A | intron        | 20 | 42472454  | -0.02042  | 0.01357 | -0.04702  | 0.006183  | -1.504   | 0.1325  | 0.7105 | 0.3321  | 0.3405  | 0.158     | 0.691   | 0.9629 | 0.7992 | 1.16   | 0.9417 |
| rs6037432  | HNF4A | intron        | 20 | 42474329  | -0.000229 | 0.01115 | -0.02276  | 0.0223    | -0.01989 | 0.9841  | 0.9883 | 0.4085  | 0.4315  | 1.03      | 0.3102  | 0.9101 | 0.7587 | 1.092  | 0.8833 |
| rs1086926  | HNF4A | 3UTR          | 20 | 42474545  | 0.0146    | 0.02544 | -0.03527  | 0.06446   | 0.5738   | 0.9662  | 0.9328 | 0.07711 | 0.0733  | 0.1042    | 0.7488  | 1.056  | 0.7573 | 1.474  | 0.9469 |
| rs2664538  | MMP9  | coding        | 20 | 44073632  | 0.009558  | 0.01349 | -0.01689  | 0.03601   | 0.7082   | 0.4788  | 0.9107 | 0.3545  | 0.3613  | 0.1012    | 0.7504  | 0.9706 | 0.8078 | 1.166  | 0.9469 |
| rs2274756  | MMP9  | coding        | 20 | 44076518  | -0.01878  | 0.01798 | -0.05402  | 0.01646   | -1.044   | 0.2964  | 0.8692 | 0.1638  | 0.135   | 3.272     | 0.07046 | 1.254  | 0.9809 | 1.604  | 0.8251 |
| rs3918282  | MMP9  | intron        | 20 | 44077177  | 0.03161   | 0.01572 | -0.00807  | 0.06242   | 2.011    | 0.04436 | 0.5001 | 0.187   | 0.225   | 4.291     | 0.0383  | 0.7926 | 0.636  | 0.9878 | 0.8251 |
| rs20544    | MMP9  | 3UTR          | 20 | 44078417  | 0.002283  | 0.01302 | -0.02323  | 0.02779   | 0.1754   | 0.8608  | 0.959  | 0.4289  | 0.4281  | 0.001287  | 0.9714  | 1.003  | 0.8397 | 1.199  | 0.9662 |
| rs17880998 | SOD1  | intron        | 21 | 31956763  | 0.02151   | 0.0202  | -0.01808  | 0.0611    | 1.065    | 0.2871  | 0.8692 | 0.1231  | 0.1125  | 0.5472    | 0.4594  | 1.108  | 0.8443 | 1.454  | 0.889  |
| rs17880890 | SOD1  | intron        | 21 | 31959435  | -0.02098  | 0.01371 | -0.04786  | 0.005891  | -1.53    | 0.126   | 0.7105 | 0.3259  | 0.3228  | 0.02131   | 0.8839  | 1.014  | 0.8404 | 1.224  | 0.9747 |
| rs17883444 | SOD1  | intron        | 21 | 31961191  | 0.02861   | 0.02531 | -0.02101  | 0.07822   | 1.13     | 0.2585  | 0.8363 | 0.06841 | 0.06394 | 0.1612    | 0.688   | 1.075  | 0.7554 | 1.53   | 0.9417 |
| rs755622   | MIF   | flanking_5UTR | 22 | 22566392  | 0.00469   | 0.01741 | -0.02943  | 0.03881   | 0.2694   | 0.7876  | 0.9579 | 0.1737  | 0.1703  | 0.04236   | 0.8369  | 1.025  | 0.8116 | 1.294  | 0.9727 |
| rs2070767  | HMOX1 | intron        | 22 | 22567463  | -0.007336 | 0.01553 | -0.03777  | 0.0231    | -0.4724  | 0.6367  | 0.9344 | 0.2195  | 0.2029  | 0.8171    | 0.366   | 1.104  | 0.8905 | 1.369  | 0.889  |
| rs17886049 | HMOX1 | intron        | 22 | 341107618 | -0.01703  | 0.01327 | -0.04304  | 0.008983  | -1.283   | 0.1995  | 0.7365 | 0.3856  | 0.3814  | 0.03735   | 0.8468  | 1.018  | 0.8496 | 1.22   | 0.9733 |
| rs2071749  | HMOX1 | intron        | 22 | 34113413  | 0.01672   | 0.01292 | -0.0086   | 0.04204   | 1.294    | 0.1958  | 0.7365 | 0.4639  | 0.4746  | 0.2259    | 0.6346  | 0.9582 | 0.8033 | 1.143  | 0.9278 |
| rs17886055 | HMOX1 | intron        | 22 | 34117065  | 0.01288   | 0.02927 | -0.04449  | 0.07025   | 0.44     | 0.6599  | 0.9344 | 0.04975 | 0.05633 | 0.4214    | 0.5162  | 0.8771 | 0.5903 | 1.303  | 0.8947 |
| rs2070767  | HMOX1 | intron        | 22 | 34117167  | -0.02057  | 0.01384 | -0.04769  | 0.008556  | -1.486   | 0.1373  | 0.7119 | 0.3333  | 0.3243  | 0.182     | 0.6696  | 1.042  | 0.8638 | 1.256  | 0.9368 |
| rs17880288 | HMOX1 | flanking_3UTR | 22 | 34120323  | -0.01663  | 0.02938 | -0.07421  | 0.04095   | -0.5662  | 0.5713  | 0.9328 | 0.04851 | 0.0416  | 0.5598    | 0.4543  | 1.174  | 0.7704 | 1.79   | 0.889  |
| rs17863419 | HMOX1 | flanking_3UTR | 22 | 34121971  | -0.004412 | 0.02968 | -0.06258  | 0.05376   | -0.1487  | 0.8818  | 0.9617 | 0.04899 | 0.04475 | 0.2007    | 0.6542  | 1.1    | 0.7256 | 1.667  | 0.9342 |
| rs4253623  | PPARA | intron        | 22 | 44928770  | 0.02604   | 0.0191  | -0.0114   | 0.06348   | 1.363    | 0.1729  | 0.7365 | 0.143   | 0.1379  | 0.1086    | 0.7417  | 1.043  | 0.8104 | 1.343  | 0.9435 |
| rs4253649  | PPARA | intron        | 22 | 44943292  | 0.008938  | 0.01299 | -0.01653  | 0.0344    | 0.6879   | 0.4916  | 0.9107 | 0.3856  | 0.4043  | 0.7285    | 0.3934  | 0.9245 | 0.7721 | 1.107  | 0.889  |
| rs4253655  | PPARA | intron        | 22 | 44947835  | -0.01378  | 0.01725 | -0.04759  | 0.02004   | -0.7984  | 0.4247  | 0.8766 | 0.1642  | 0.1713  | 0.7293    | 0.672   | 0.9503 | 0.7505 | 1.203  | 0.9368 |
| rs4253701  | PPARA | intron        | 22 | 44964774  | -0.006638 | 0.01984 | -0.04572  | 0.03204   | -0.3447  | 0.7303  | 0.953  | 0.1082  | 0.1202  | 0.6965    | 0.404   | 0.8863 | 0.6724 | 1.173  | 0.889  |
| rs4253712  | PPARA | intron        | 22 | 44973699  | -0.01142  | 0.01523 | -0.04127  | 0.01844   | -0.7496  | 0.4536  | 0.8867 | 0.2313  | 0.2616  | 2.418     | 0.1199  | 0.8496 | 0.6918 | 1.043  | 0.8251 |
| rs4253728  | PPARA | intron        | 22 | 44988731  | -0.01311  | 0.01433 | -0.0412   | 0.01497   | -0.915   | 0.3602  | 0.875  | 0.2761  | 0.2982  | 1.171     | 0.2792  | 0.8979 | 0.7388 | 1.091  | 0.8667 |
| rs1800206  | PPARA | coding        | 22 | 44992938  | -0.0287   | 0.02504 | -0.07196  | 0.02621   | -0.9133  | 0.3611  | 0.875  | 0.06716 | 0.0755  | 0.5144    | 0.4733  | 0.8816 | 0.6247 | 1.244  | 0.889  |
| rs4253754  | PPARA | intron        | 22 | 44993808  | -0.008194 | 0.01576 | -0.03908  | 0.02269   | -0.5201  | 0.603   | 0.9344 | 0.2045  | 0.2327  | 2.279     | 0.1311  | 0.8478 | 0.6841 | 1.051  | 0.8251 |
| rs4253765  | PPARA | intron        | 22 | 45001552  | -0.009738 | 0.01645 | -0.04197  | 0.0225    | -0.5921  | 0.5538  | 0.9237 | 0.1766  | 0.2029  | 2.207     | 0.1374  | 0.8425 | 0.6719 | 1.056  | 0.8251 |
| rs4253776  | PPARA | intron        | 22 | 45008143  | -0.02775  | 0.01986 | -0.06668  | 0.01118   | -1.397   | 0.1624  | 0.7365 | 0.1194  | 0.1279  | 0.3277    | 0.567   | 0.9246 | 0.7071 | 1.209  | 0.8995 |
