# Supplementary material
Source: PubMed Central journal article supplement (PMC2791897)
Supplement: NIHMS98994-supplement-3.pdf [file NIHMS98994-supplement-3.pdf]

| SNP association with log(IL-6) in CHS African-Americans |          |               |     |           |           |         |           |           |             | SNP association with longevity case-control status in CHS African-Americans |             |             |                |          |         |            |        |        |             |        |
|---------------------------------------------------------|----------|---------------|-----|-----------|-----------|---------|-----------|-----------|-------------|-----------------------------------------------------------------------------|-------------|-------------|----------------|----------|---------|------------|--------|--------|-------------|--------|
| SNP                                                     | gene     | location      | CHR | BP        | BETA      | S.E.    | L95%      | U95%      | T statistic | P-value                                                                     | FDR q-value | case allele | control allele | CHISQ    | P-value | Odds ratio | L95%   | U95%   | FDR q-value |        |
| rs652599                                                | TNFRSF1B | flanking_5UTR | 1   | 12159641  | 0.04743   | 0.04501 | -0.04079  | 0.1356    | 1.054       | 0.2924                                                                      | 0.961       | 0.1493      | 0.1491         | 1.30E-05 | 0.9971  | 1.001      | 0.5714 | 0.9971 | 1.754       | 0.9985 |
| rs17885207                                              | TNFRSF1B | flanking_5UTR | 1   | 12160238  | -0.05229  | 0.05874 | -0.1674   | 0.06284   | -0.8901     | 0.3737                                                                      | 0.961       | 0.05224     | 0.09412        | 2.233    | 0.1351  | 0.5305     | 0.2282 | 0.9825 | 1.233       | 0.9825 |
| rs17878610                                              | TNFRSF1B | intron        | 1   | 12164711  | 0.01938   | 0.05566 | -0.0897   | 0.1285    | 0.3482      | 0.7278                                                                      | 0.9755      | 0.08209     | 0.09957        | 0.1543   | 0.6944  | 0.8664     | 0.4233 | 0.9936 | 1.773       | 0.9936 |
| rs17884085                                              | TNFRSF1B | intron        | 1   | 12166782  | 0.01895   | 0.05701 | -0.1184   | 0.1563    | 0.2703      | 0.7877                                                                      | 0.9755      | 0.02985     | 0.06725        | 2.517    | 0.1126  | 0.4268     | 0.1448 | 0.9825 | 1.258       | 0.9825 |
| rs17883856                                              | TNFRSF1B | intron        | 1   | 12167072  | -0.03514  | 0.03396 | -0.1017   | 0.03143   | -1.035      | 0.3012                                                                      | 0.961       | 0.3284      | 0.3187         | 0.04106  | 0.8394  | 1.045      | 0.6823 | 0.9936 | 1.601       | 0.9936 |
| rs17886166                                              | TNFRSF1B | intron        | 1   | 12168020  | -0.0193   | 0.03842 | -0.09068  | 0.05209   | -0.5298     | 0.5964                                                                      | 0.9755      | 0.2463      | 0.2573         | 0.06191  | 0.8035  | 0.9431     | 0.5943 | 0.9936 | 1.497       | 0.9936 |
| rs17888311                                              | TNFRSF1B | intron        | 1   | 12168888  | 0.02416   | 0.06393 | 0.03482   | 0.1602    | 0.3482      | 0.7278                                                                      | 0.9755      | 0.08209     | 0.04971        | 1.824    | 0.1769  | 1.71       | 0.7788 | 0.9825 | 3.753       | 0.9825 |
| rs17885364                                              | TNFRSF1B | intron        | 1   | 12175316  | -0.01367  | 0.04582 | -0.1035   | 0.07614   | -0.2963     | 0.7656                                                                      | 0.9761      | 0.1716      | 0.1462         | 0.48     | 0.4884  | 1.21       | 0.7052 | 0.9825 | 2.077       | 0.9825 |
| rs17881405                                              | TNFRSF1B | intron        | 1   | 12176257  | -0.0286   | 0.03696 | -0.101    | 0.04384   | -0.7738     | 0.4393                                                                      | 0.9755      | 0.2239      | 0.2427         | 0.1882   | 0.6645  | 0.9001     | 0.5595 | 0.9936 | 1.448       | 0.9936 |
| rs17886145                                              | TNFRSF1B | intron        | 1   | 12176362  | -0.1028   | 0.02054 | -0.2328   | 0.0272    | -1.155      | 0.1216                                                                      | 0.9755      | 0.09701     | 0.05556        | 2.639    | 0.1043  | 1.826      | 0.8751 | 0.9825 | 3.812       | 0.9825 |
| rs17884052                                              | TNFRSF1B | intron        | 1   | 12179295  | -0.06632  | 0.03845 | -0.1417   | 0.009046  | -1.725      | 0.08501                                                                     | 0.8922      | 0.2313      | 0.2339         | 0.00357  | 0.9524  | 0.9857     | 0.6141 | 0.9825 | 1.582       | 0.9825 |
| rs17883437                                              | TNFRSF1B | coding        | 1   | 12187221  | -0.07337  | 0.03887 | -0.1495   | 0.002809  | -1.888      | 0.05947                                                                     | 0.8922      | 0.2388      | 0.2135         | 0.36     | 0.5485  | 1.156      | 0.7197 | 0.9825 | 1.857       | 0.9825 |
| rs17883114                                              | TNFRSF1B | intron        | 1   | 12189626  | -0.01856  | 0.04999 | -0.1165   | 0.07943   | -0.3712     | 0.7106                                                                      | 0.9755      | 0.1119      | 0.09942        | 0.1636   | 0.6859  | 1.142      | 0.6001 | 0.9825 | 2.173       | 0.9825 |
| rs17880735                                              | TNFRSF1B | intron        | 1   | 12193639  | -0.1403   | 0.07122 | -0.2798   | -0.006663 | -1.969      | 0.04931                                                                     | 0.8922      | 0.1119      | 0.08772        | 0.6598   | 0.4166  | 1.311      | 0.6811 | 0.9825 | 2.523       | 0.9825 |
| rs17883167                                              | TNFRSF1B | intron        | 1   | 12196584  | -0.01181  | 0.04362 | -0.09732  | 0.07369   | -0.2708     | 0.7866                                                                      | 0.9761      | 0.09701     | 0.1339         | 1.207    | 0.272   | 0.6948     | 1.334  | 0.9825 | 1.334       | 0.9825 |
| rs17884213                                              | TNFRSF1B | intron        | 1   | 12197811  | -0.02054  | 0.04817 | -0.115    | 0.07388   | -0.4264     | 0.67                                                                        | 0.9755      | 0.1418      | 0.1199         | 0.4195   | 0.5172  | 1.213      | 0.6758 | 0.9825 | 2.177       | 0.9825 |
| rs1061624                                               | TNFRSF1B | 3UTR          | 1   | 12201531  | -0.004292 | 0.03379 | -0.07053  | 0.06194   | -0.127      | 0.899                                                                       | 0.932       | 0.3433      | 0.3509         | 0.02444  | 0.8758  | 0.967      | 0.6353 | 0.9936 | 1.472       | 0.9936 |
| rs17882912                                              | TNFRSF1B | flanking_3UTR | 1   | 12201821  | -0.07932  | 0.06164 | -0.2001   | 0.0415    | -1.287      | 0.1986                                                                      | 0.9444      | 0.08209     | 0.08772        | 0.03877  | 0.8439  | 0.9301     | 0.452  | 0.9936 | 1.914       | 0.9936 |
| rs17885817                                              | TNFRSF1B | flanking_3UTR | 1   | 12203973  | 0.1486    | 0.06887 | 0.01357   | 0.2835    | 2.157       | 0.03134                                                                     | 0.8922      | 0.06716     | 0.05848        | 0.1269   | 0.7216  | 1.159      | 0.5139 | 0.9825 | 2.615       | 0.9825 |
| rs4647014                                               | JUN      | coding        | 1   | 58958008  | -0.03835  | 0.04874 | -0.1339   | 0.05718   | -0.7668     | 0.4317                                                                      | 0.9755      | 0.1493      | 0.1294         | 0.324    | 0.5692  | 1.18       | 0.6668 | 0.9825 | 2.089       | 0.9825 |
| rs2811894                                               | JUN      | 5UTR          | 1   | 58961052  | -0.09268  | 0.05316 | -0.1969   | 0.01151   | -1.743      | 0.08168                                                                     | 0.8922      | 0.1212      | 0.1118         | 0.08376  | 0.7723  | 1.01       | 0.554  | 0.9936 | 1.842       | 0.9936 |
| rs4647001                                               | JUN      | flanking_5UTR | 1   | 58962439  | 0.007544  | 0.03324 | -0.05761  | 0.0727    | 0.2269      | 0.8205                                                                      | 0.9844      | 0.2761      | 0.3024         | 0.3176   | 0.5731  | 0.88       | 0.564  | 0.9825 | 1.373       | 0.9825 |
| rs4646998                                               | JUN      | flanking_5UTR | 1   | 58962731  | -0.1004   | 0.07106 | -0.2396   | 0.03893   | -1.412      | 0.1583                                                                      | 0.923       | 0.06818     | 0.05           | 0.6039   | 0.4371  | 1.39       | 0.6037 | 0.9825 | 3.202       | 0.9825 |
| rs2760501                                               | JUN      | flanking_5UTR | 1   | 58963118  | 0.04672   | 0.03642 | -0.02467  | 0.1181    | 1.283       | 0.2001                                                                      | 0.9444      | 0.2761      | 0.3176         | 0.7807   | 0.3769  | 0.8194     | 0.5266 | 0.9825 | 1.275       | 0.9825 |
| rs1409419                                               | VCAM1    | flanking_5UTR | 1   | 100895417 | 0.01481   | 0.0323  | -0.0485   | 0.07811   | 0.4584      | 0.6468                                                                      | 0.9755      | 0.3806      | 0.4152         | 0.4783   | 0.4892  | 0.8654     | 0.5745 | 0.9825 | 1.304       | 0.9825 |
| rs3170794                                               | VCAM1    | flanking_5UTR | 1   | 100896605 | -0.02137  | 0.04582 | -0.1112   | 0.06844   | -0.4665     | 0.641                                                                       | 0.9755      | 0.209       | 0.1491         | 2.49     | 0.1146  | 1.507      | 0.9034 | 0.9825 | 2.515       | 0.9825 |
| rs3176860                                               | VCAM1    | intron        | 1   | 100899240 | -0.02036  | 0.03223 | -0.08353  | 0.04281   | -0.6317     | 0.5278                                                                      | 0.9755      | 0.4478      | 0.4912         | 0.7289   | 0.3932  | 0.8398     | 0.5623 | 0.9825 | 1.254       | 0.9825 |
| rs3176861                                               | VCAM1    | intron        | 1   | 100899342 | -0.06137  | 0.06892 | -0.1965   | 0.0737    | -0.8905     | 0.3735                                                                      | 0.961       | 0.02985     | 0.0614         | 1.926    | 0.1652  | 0.4703     | 0.1584 | 0.9825 | 1.397       | 0.9825 |
| rs3176862                                               | VCAM1    | intron        | 1   | 100899997 | -0.000957 | 0.04203 | -0.08332  | 0.08141   | -0.2276     | 0.9818                                                                      | 0.996       | 0.2761      | 0.1901         | 4.235    | 0.09959 | 1.626      | 1.021  | 0.9825 | 2.588       | 0.9825 |
| rs3917009                                               | VCAM1    | intron        | 1   | 100901431 | -0.1383   | 0.07093 | -0.2773   | 0.00683   | -1.95       | 0.05153                                                                     | 0.8922      | 0.06716     | 0.04971        | 0.5682   | 0.451   | 1.376      | 0.5979 | 0.9825 | 3.169       | 0.9825 |
| rs2392221                                               | VCAM1    | intron        | 1   | 100902194 | 0.07426   | 0.061   | -0.04529  | 0.1938    | 1.217       | 0.2238                                                                      | 0.9444      | 0.05224     | 0.08772        | 1.691    | 0.1935  | 0.5732     | 0.2455 | 0.9825 | 1.339       | 0.9825 |
| rs3917038                                               | VCAM1    | intron        | 1   | 100904383 | 0.07563   | 0.05169 | 0.02568   | 0.1769    | 1.463       | 0.1439                                                                      | 0.9063      | 0.1791      | 0.1023         | 5.225    | 0.2227  | 1.914      | 1.09   | 0.9825 | 3.361       | 0.9825 |
| rs3176867                                               | VCAM1    | intron        | 1   | 100906226 | 0.151     | 0.06395 | 0.02562   | 0.2763    | 2.361       | 0.01852                                                                     | 0.8922      | 0.04478     | 0.07018        | 1.052    | 0.3051  | 0.6211     | 0.2481 | 0.9825 | 1.555       | 0.9825 |
| rs3917052                                               | VCAM1    | intron        | 1   | 100907456 | 0.008587  | 0.04002 | -0.06985  | 0.08703   | 0.2146      | 0.8302                                                                      | 0.9856      | 0.1615      | 0.2086         | 1.31     | 0.2524  | 0.731      | 0.4268 | 0.9825 | 1.252       | 0.9825 |
| rs3917058                                               | VCAM1    | intron        | 1   | 100908308 | -0.04784  | 0.04079 | -0.149    | 0.05331   | -0.927      | 0.3542                                                                      | 0.961       | 0.09701     | 0.1294         | 0.9536   | 0.3288  | 0.7228     | 0.3759 | 0.9825 | 1.39        | 0.9825 |
| rs3917059                                               | VCAM1    | intron        | 1   | 100908658 | 0.02248   | 0.04079 | -0.05747  | 0.1024    | 0.5511      | 0.5817                                                                      | 0.9755      | 0.2239      | 0.2164         | 0.03177  | 0.8585  | 1.045      | 0.6459 | 0.9936 | 1.69        | 0.9936 |
| rs3783613                                               | VCAM1    | coding        | 1   | 100908808 | -0.04631  | 0.0501  | -0.1445   | 0.05188   | -0.9244     | 0.3556                                                                      | 0.961       | 0.1119      | 0.1667         | 2.246    | 0.134   | 0.6303     | 0.3433 | 0.9825 | 1.157       | 0.9825 |
| rs3176871                                               | VCAM1    | intron        | 1   | 100909310 | 0.05593   | 0.04957 | -0.04123  | 0.1531    | 1.128       | 0.2596                                                                      | 0.958       | 0.1269      | 0.1404         | 0.1485   | 0.7     | 0.89       | 0.4917 | 0.9825 | 1.611       | 0.9825 |
| rs3176875                                               | VCAM1    | intron        | 1   | 100912000 | -0.02323  | 0.04369 | -0.1089   | 0.0624    | -0.5317     | 0.5951                                                                      | 0.9755      | 0.1269      | 0.1725         | 1.495    | 0.2214  | 0.6969     | 0.3899 | 0.9825 | 1.246       | 0.9825 |
| rs3176876                                               | VCAM1    | intron        | 1   | 100912629 | -0.03376  | 0.03226 | -0.09699  | 0.02947   | -1.046      | 0.2958                                                                      | 0.961       | 0.4621      | 0.4853         | 0.2046   | 0.651   | 0.9112     | 0.6091 | 0.9936 | 1.363       | 0.9936 |
| rs3917016                                               | VCAM1    | intron        | 1   | 100913168 | 0.08488   | 0.07061 | -0.05352  | 0.2233    | 1.202       | 0.2297                                                                      | 0.9444      | 0.0597      | 0.0731         | 0.2679   | 0.6048  | 0.8051     | 0.3537 | 0.9936 | 1.832       | 0.9936 |
| rs3819950                                               | VCAM1    | intron        | 1   | 100914277 | 0.00074   | 0.04513 | -0.08771  | 0.08919   | 0.01641     | 0.9869                                                                      | 0.9966      | 0.08209     | 0.1696         | 5.947    | 0.01474 | 0.4379     | 0.2222 | 0.9825 | 0.863       | 0.9825 |
| rs3917019                                               | VCAM1    | intron        | 1   | 100914375 | 0.08271   | 0.03282 | -0.01163  | 0.117     | 1.606       | 0.1088                                                                      | 0.8922      | 0.5149      | 0.5175         | 0.002643 | 0.959   | 0.9896     | 0.6635 | 0.9825 | 1.476       | 0.9825 |
| rs3917075                                               | VCAM1    | intron        | 1   | 100915134 | -0.03225  | 0.06466 | -0.1159   | 0.09447   | -0.4988     | 0.6181                                                                      | 0.958       | 0.1119      | 0.07941        | 1.259    | 0.2618  | 1.461      | 0.7511 | 0.9825 | 2.843       | 0.9825 |
| rs3176877                                               | VCAM1    | intron        | 1   | 100915416 | -0.04607  | 0.03558 | -0.1158   | 0.02366   | -1.295      | 0.1957                                                                      | 0.9444      | 0.3507      | 0.2573         | 4.137    | 0.04196 | 1.559      | 1.015  | 0.9825 | 2.396       | 0.9825 |
| rs3176878                                               | VCAM1    | coding        | 1   | 100915719 | 0.0794    | 0.04231 | -0.003529 | 0.1623    | 1.877       | 0.06099                                                                     | 0.8922      | 0.1894      | 0.1579         | 0.6804   | 0.4095  | 1.246      | 0.7383 | 0.9825 | 2.103       | 0.9825 |
| rs3783615                                               | VCAM1    | coding        | 1   | 100915786 | 0.02557   | 0.05346 | -0.1184   | 0.1695    | 0.348       | 0.4729                                                                      | 0.9755      | 0.04478     | 0.0614         | 0.4975   | 0.4806  | 0.7165     | 0.2827 | 0.9825 | 1.816       | 0.9825 |
| rs3917078                                               | VCAM1    | flanking_3UTR | 1   | 100917564 | 0.0619    | 0.03369 | -0.04288  | 0.1667    | 1.158       | 0.2473                                                                      | 0.958       | 0.06716     | 0.117          | 2.585    | 0.1079  | 0.5436     |        |        |             |        |

|            |       |                |   |            |           |         |          |           |          |         |        |         |         |          |         |        |        |        |        |
|------------|-------|----------------|---|------------|-----------|---------|----------|-----------|----------|---------|--------|---------|---------|----------|---------|--------|--------|--------|--------|
| rs1386821  | IL6R  | intron         | 1 | 1511951222 | -0.03009  | 0.05461 | -0.1371  | 0.07693   | -0.5511  | 0.5817  | 0.9755 | 0.1269  | 0.1111  | 0.2338   | 0.6287  | 1.162  | 0.6314 | 2.14   | 0.9936 |
| rs4075015  | IL6R  | intron         | 1 | 151202269  | 0.1052    | 0.05004 | 0.007127 | 0.2033    | 0.2033   | 0.03587 | 0.8922 | 0.1194  | 0.114   | 0.02715  | 0.8691  | 1.053  | 0.567  | 1.957  | 0.9936 |
| rs4845618  | IL6R  | intron         | 1 | 151213088  | -0.02039  | 0.03229 | -0.08367 | 0.04288   | -0.6317  | 0.5278  | 0.9755 | 0.4851  | 0.5147  | 0.3376   | 0.5612  | 0.8882 | 0.5954 | 1.325  | 0.9936 |
| rs7518199  | IL6R  | intron         | 1 | 151220492  | -0.03452  | 0.03838 | -0.1097  | 0.04071   | -0.8993  | 0.3688  | 0.961  | 0.2388  | 0.2105  | 0.4509   | 0.5019  | 1.176  | 0.7319 | 1.891  | 0.9825 |
| rs4553185  | IL6R  | intron         | 1 | 151224028  | 0.03045   | 0.03237 | -0.03299 | 0.09389   | 0.9407   | 0.3472  | 0.961  | 0.4851  | 0.4708  | 0.07911  | 0.7785  | 1.059  | 0.71   | 1.58   | 0.9936 |
| rs4537545  | IL6R  | intron         | 1 | 151231952  | 0.04411   | 0.03456 | -0.02363 | 0.1118    | 1.276    | 0.2023  | 0.9444 | 0.3806  | 0.3421  | 0.6246   | 0.4293  | 1.182  | 0.781  | 1.788  | 0.9825 |
| rs11265618 | IL6R  | intron         | 1 | 151243165  | -0.005251 | 0.03538 | -0.0746  | 0.0641    | -0.1484  | 0.8821  | 0.932  | 0.3507  | 0.348   | 0.003307 | 0.9541  | 1.012  | 0.666  | 1.539  | 0.9978 |
| rs4329505  | IL6R  | intron         | 1 | 151245493  | 0.03347   | 0.0354  | -0.03591 | 0.1029    | 0.9456   | 0.3447  | 0.961  | 0.3106  | 0.3889  | 2.512    | 0.113   | 0.708  | 0.4615 | 1.086  | 0.9825 |
| rs2229238  | IL6R  | 3'UTR          | 1 | 151250969  | 0.01649   | 0.03935 | -0.09362 | 0.06064   | -0.4191  | 0.6753  | 0.9755 | 0.2164  | 0.2105  | 0.01999  | 0.8876  | 1.036  | 0.6368 | 1.685  | 0.9936 |
| rs4072391  | IL6R  | 3'UTR          | 1 | 151251953  | -0.04423  | 0.03461 | -0.1121  | 0.02361   | -1.278   | 0.2018  | 0.9444 | 0.3433  | 0.3596  | 0.1126   | 0.7372  | 0.9307 | 0.6119 | 1.416  | 0.9936 |
| rs1446963  | APCS  | flanking_3'UTR | 1 | 156372604  | -0.03731  | 0.03411 | -0.1042  | 0.02954   | -1.094   | 0.2744  | 0.9582 | 0.2612  | 0.348   | 0.00881  | 0.6825  | 0.4245 | 1.034  | 0.9825 |        |
| rs1900393  | APCS  | flanking_3'UTR | 1 | 156373035  | 0.03866   | 0.0327  | -0.02522 | 0.103     | 1.189    | 0.235   | 0.9444 | 0.4077  | 0.4471  | 0.5926   | 0.4414  | 0.8513 | 0.565  | 1.283  | 0.9825 |
| rs3917854  | SELP  | intron         | 1 | 166290693  | 0.07691   | 0.05445 | -0.02981 | 0.1836    | 1.412    | 0.1582  | 0.923  | 0.1194  | 0.1029  | 0.2713   | 0.6025  | 1.182  | 0.6303 | 2.215  | 0.9936 |
| rs3917834  | SELP  | intron         | 1 | 166291870  | 0.03819   | 0.0525  | -0.06471 | 0.1411    | 0.7274   | 0.4672  | 0.9755 | 0.1045  | 0.09942 | 0.02721  | 0.869   | 1.057  | 0.5478 | 2.039  | 0.9936 |
| rs3917753  | SELP  | intron         | 1 | 166307665  | -0.006246 | 0.06274 | -0.1292  | 0.1167    | -0.09954 | 0.9207  | 0.932  | 0.09701 | 0.06765 | 1.181    | 0.2771  | 1.481  | 0.7268 | 3.017  | 0.9825 |
| rs3917750  | SELP  | intron         | 1 | 166308411  | 0.0479    | 0.04846 | -0.04708 | 0.1429    | 0.9884   | 0.3233  | 0.961  | 0.1343  | 0.1228  | 0.116    | 0.7334  | 1.108  | 0.613  | 2.004  | 0.9936 |
| rs2142760  | SELP  | intron         | 1 | 166308991  | 0.01447   | 0.03294 | -0.05009 | 0.07903   | 0.4392   | 0.6606  | 0.9755 | 0.3582  | 0.3772  | 0.1485   | 0.6999  | 0.9216 | 0.6083 | 1.396  | 0.9936 |
| rs2205896  | SELP  | intron         | 1 | 166309648  | -0.01621  | 0.04918 | -0.1126  | 0.08019   | -0.3295  | 0.7419  | 0.9755 | 0.1343  | 0.1111  | 0.4999   | 0.4795  | 1.241  | 0.6811 | 2.262  | 0.9825 |
| rs3917744  | SELP  | intron         | 1 | 166310244  | 0.01404   | 0.05545 | -0.09463 | 0.1227    | 0.2532   | 0.8002  | 0.9761 | 0.1269  | 0.09942 | 0.7584   | 0.3838  | 1.316  | 0.7081 | 2.447  | 0.9825 |
| rs2076074  | SELP  | intron         | 1 | 166310924  | 0.02661   | 0.03367 | -0.03938 | 0.09261   | 0.7904   | 0.4296  | 0.9755 | 0.3995  | 0.4059  | 0.04288  | 0.836   | 0.9578 | 0.6367 | 1.441  | 0.9936 |
| rs3917740  | SELP  | intron         | 1 | 166311036  | 0.000485  | 0.04282 | -0.08344 | 0.08441   | 0.1133   | 0.991   | 0.9666 | 0.2015  | 0.1813  | 0.2586   | 0.6111  | 1.14   | 0.6885 | 1.886  | 0.9936 |
| rs2236305  | SELP  | intron         | 1 | 166311303  | 0.002678  | 0.03141 | -0.05889 | 0.06424   | 0.08525  | 0.9321  | 0.9832 | 0.4104  | 0.4532  | 0.7143   | 0.398   | 0.8399 | 0.5604 | 1.259  | 0.9825 |
| rs2326302  | SELP  | intron         | 1 | 166311948  | -0.007731 | 0.0325  | -0.07142 | 0.05596   | -0.2379  | 0.812   | 0.9839 | 0.4776  | 0.4708  | 0.799    | 0.1955  | 1.303  | 0.8723 | 1.947  | 0.9825 |
| rs3917753  | SELP  | intron         | 1 | 166312916  | 0.02243   | 0.03701 | -0.05011 | 0.09496   | 0.6059   | 0.5448  | 0.9755 | 0.2239  | 0.2895  | 2.097    | 0.1476  | 0.708  | 0.4431 | 1.131  | 0.9825 |
| rs3917724  | SELP  | coding         | 1 | 166313253  | -0.01006  | 0.05624 | -0.1183  | 0.09821   | -0.1821  | 0.8555  | 0.9909 | 0.1045  | 0.1257  | 0.4126   | 0.5207  | 0.8112 | 0.4281 | 1.537  | 0.9825 |
| rs3917720  | SELP  | intron         | 1 | 166314287  | -0.03825  | 0.06322 | -0.1622  | 0.08967   | -0.605   | 0.8454  | 0.9755 | 0.08333 | 0.06433 | 0.5311   | 0.4661  | 1.322  | 0.4408 | 2.809  | 0.9825 |
| rs236868   | SELP  | intron         | 1 | 166315654  | 0.007388  | 0.03635 | -0.06366 | 0.07863   | 0.2033   | 0.839   | 0.9856 | 0.2388  | 0.3275  | 3.588    | 0.05819 | 0.6443 | 0.408  | 1.017  | 0.9825 |
| rs3917705  | SELP  | intron         | 1 | 166317208  | 0.009705  | 0.07366 | -0.1347  | 0.1541    | 0.1318   | 0.8952  | 0.9832 | 0.02985 | 0.06725 | 2.517    | 0.1126  | 0.4268 | 0.1448 | 1.258  | 0.9825 |
| rs2244529  | SELP  | intron         | 1 | 166318690  | 0.04613   | 0.03356 | -0.01965 | 0.1119    | 1.374    | 0.1697  | 0.9335 | 0.4254  | 0.4708  | 0.799    | 0.3714  | 0.8322 | 0.5562 | 1.245  | 0.9825 |
| rs3917683  | SELP  | intron         | 1 | 166323031  | 0.02482   | 0.03451 | -0.04282 | 0.09245   | 0.7191   | 0.4723  | 0.9755 | 0.3806  | 0.4006  | 0.161    | 0.6883  | 0.9194 | 0.61   | 1.386  | 0.9936 |
| rs3917661  | SELP  | intron         | 1 | 166329626  | 0.03682   | 0.05944 | -0.07968 | 0.1533    | 0.6194   | 0.5358  | 0.9755 | 0.1119  | 0.08187 | 1.059    | 0.3034  | 1.414  | 0.7294 | 2.74   | 0.9825 |
| rs3753306  | SELP  | intron         | 1 | 166331890  | -0.05383  | 0.03292 | -0.1183  | 0.01069   | -0.183   | 0.8144  | 0.8922 | 0.4776  | 0.4471  | 0.3617   | 0.5475  | 1.131  | 0.7574 | 1.688  | 0.9825 |
| rs4987391  | SELL  | flanking_3'UTR | 1 | 166389847  | 0.03149   | 0.03867 | -0.04429 | 0.1073    | 0.8144   | 0.4157  | 0.9755 | 0.2537  | 0.2865  | 0.5174   | 0.4719  | 0.8465 | 0.5375 | 1.333  | 0.9825 |
| rs4987389  | SELL  | flanking_3'UTR | 1 | 166390167  | -0.01443  | 0.03357 | -0.08023 | 0.05137   | -0.4299  | 0.6674  | 0.9755 | 0.4773  | 0.4474  | 0.3434   | 0.5579  | 1.128  | 0.7541 | 1.687  | 0.9825 |
| rs4987379  | SELL  | intron         | 1 | 166392957  | -0.05638  | 0.05066 | -0.1577  | 0.04091   | -1.152   | 0.2496  | 0.958  | 0.1343  | 0.1462  | 0.1108   | 0.7392  | 0.9062 | 0.5073 | 1.619  | 0.9936 |
| rs2298902  | SELL  | intron         | 1 | 166394737  | 0.02045   | 0.05636 | -0.09002 | 0.1309    | 0.3628   | 0.1768  | 0.9755 | 0.1194  | 0.07018 | 3.031    | 0.08168 | 1.797  | 0.9222 | 3.5    | 0.9825 |
| rs4987366  | SELL  | intron         | 1 | 166395036  | 0.004475  | 0.04905 | -0.09166 | 0.1006    | 0.09124  | 0.9273  | 0.932  | 0.08955 | 0.117   | 0.7432   | 0.3886  | 0.7426 | 0.3768 | 1.464  | 0.9825 |
| rs4987358  | SELL  | intron         | 1 | 166397209  | 0.04166   | 0.03417 | -0.02531 | 0.1086    | 1.219    | 0.2231  | 0.9444 | 0.3134  | 0.2982  | 0.1052   | 0.7456  | 1.074  | 0.6971 | 1.655  | 0.9936 |
| rs4987351  | SELL  | intron         | 1 | 166399013  | -0.08474  | 0.03256 | -0.1285  | -0.009935 | -0.989   | 0.04712 | 0.8922 | 0.4179  | 0.4912  | 2.077    | 0.1495  | 0.7436 | 0.4967 | 1.113  | 0.9825 |
| rs4987342  | SELL  | intron         | 1 | 166400605  | -0.003139 | 0.03531 | -0.07235 | 0.06607   | -0.0889  | 0.9292  | 0.932  | 0.3209  | 0.3088  | 0.06523  | 0.7984  | 1.058  | 0.6883 | 1.625  | 0.9936 |
| rs4987338  | SELL  | intron         | 1 | 16640906   | 0.006574  | 0.04296 | -0.07762 | 0.09077   | 0.1531   | 0.8784  | 0.9832 | 0.2015  | 0.1754  | 0.4375   | 0.5083  | 1.186  | 0.7152 | 1.967  | 0.9825 |
| rs4987310  | SELL  | coding         | 1 | 166405496  | 0.0506    | 0.03796 | -0.02379 | 0.125     | 0.3376   | 0.8329  | 0.9444 | 0.2761  | 0.2333  | 5.93E-05 | 0.9939  | 0.9982 | 0.6384 | 1.561  | 0.9985 |
| rs3177980  | SELL  | coding         | 1 | 166408144  | 0.003124  | 0.04132 | -0.07786 | 0.08411   | 0.07562  | 0.9397  | 0.932  | 0.1493  | 0.1842  | 0.8172   | 0.366   | 0.7769 | 0.4491 | 1.344  | 0.9825 |
| rs5368     | SELL  | coding         | 1 | 166428604  | 0.07567   | 0.06041 | -0.04272 | 0.1941    | 1.253    | 0.2107  | 0.9444 | 0.08209 | 0.1059  | 0.6082   | 0.4351  | 0.7552 | 0.3724 | 1.531  | 0.9825 |
| rs1534904  | SELL  | intron         | 1 | 166430483  | -0.04376  | 0.06379 | -0.1688  | 0.08127   | -0.686   | 0.493   | 0.9755 | 0.08209 | 0.07602 | 0.4942   | 0.8241  | 1.087  | 0.5211 | 2.267  | 0.9936 |
| rs2076059  | SELL  | intron         | 1 | 166430579  | -0.009330 | 0.03488 | -0.07769 | 0.05902   | -0.2677  | 0.789   | 0.9761 | 0.2612  | 0.2719  | 0.05644  | 0.8122  | 0.9466 | 0.6017 | 1.489  | 0.9936 |
| rs92307    | SELL  | intron         | 1 | 166434363  | 0.02408   | 0.03347 | -0.04152 | 0.08967   | 0.7194   | 0.4721  | 0.9755 | 0.3561  | 0.3801  | 0.2356   | 0.6274  | 0.9017 | 0.5937 | 1.369  | 0.9936 |
| rs5353     | SELL  | intron         | 1 | 166434632  | -0.04037  | 0.03167 | -0.0206  | 0.1036    | 1.309    | 0.1908  | 0.9444 | 0.4179  | 0.4591  | 0.846    | 0.4167  | 0.846  | 0.5649 | 1.267  | 0.9825 |
| rs3917397  | SELL  | flanking_5'UTR | 1 | 166434842  | -0.04133  | 0.06689 | -0.1714  | 0.09077   | -0.6029  | 0.5468  | 0.9755 | 0.08209 | 0.06725 | 0.3196   | 0.5719  | 1.24   | 0.5871 | 1.621  | 0.9825 |
| rs4648308  | PTGS2 | flanking_3'UTR | 1 | 183372274  | -0.04597  | 0.03355 | -0.1117  | 0.01979   | -1.37    | 0.1711  | 0.9335 | 0.4179  | 0.4147  | 0.004064 | 0.9492  | 1.013  | 0.6755 | 1.52   | 0.9978 |

|            |       |               |   |           |           |         |          |          |          |         |         |         |         |          |          |        |        |        |        |        |
|------------|-------|---------------|---|-----------|-----------|---------|----------|----------|----------|---------|---------|---------|---------|----------|----------|--------|--------|--------|--------|--------|
| rs689470   | PTGS2 | 3UTR          | 1 | 183372715 | 0.02184   | 0.03364 | -0.04409 | 0.08778  | 0.6494   | 0.5163  | 0.97555 | 0.4478  | 0.462   | 0.0785   | 0.7793   | 0.9442 | 0.6321 | 1.411  | 0.9936 |        |
| rs5275     | PTGS2 | 3UTR          | 1 | 183374715 | -0.0297   | 0.03422 | -0.09677 | 0.03737  | -0.868   | 0.3857  | 0.961   | 0.3507  | 0.3471  | 0.005759 | 0.9395   | 1.016  | 0.6683 | 1.546  | 0.9978 |        |
| rs5279     | PTGS2 | coding        | 1 | 183376735 | 0.03656   | 0.06975 | -0.1001  | 0.1733   | 0.5242   | 0.6003  | 0.97555 | 0.05224 | 0.08284 | 1.309    | 0.2526   | 0.6102 | 0.2599 | 1.433  | 0.9825 |        |
| rs4648276  | PTGS2 | intron        | 1 | 183377145 | 0.06827   | 0.04748 | -0.03479 | 0.1513   | 1.227    | 0.2201  | 0.9444  | 0.1269  | 0.1199  | 0.04387  | 0.8341   | 1.067  | 0.5829 | 1.952  | 0.9936 |        |
| rs4648274  | PTGS2 | intron        | 1 | 183378137 | 0.04411   | 0.04751 | -0.05202 | 0.1342   | 0.8651   | 0.3873  | 0.961   | 0.1269  | 0.1353  | 0.05925  | 0.8077   | 0.9287 | 0.5116 | 1.686  | 0.9936 |        |
| rs20417    | PTGS2 | flanking_5UTR | 1 | 183381978 | 0.04997   | 0.03554 | -0.01969 | 0.1196   | 1.406    | 0.1602  | 0.923   | 0.3209  | 0.3304  | 0.03955  | 0.8424   | 0.9576 | 0.6248 | 1.468  | 0.9936 |        |
| rs689466   | PTGS2 | flanking_5UTR | 1 | 183382408 | -0.03263  | 0.06096 | -0.1521  | 0.08886  | -0.5352  | 0.5927  | 0.97555 | 0.08209 | 0.06433 | 0.4708   | 0.4926   | 1.301  | 0.6126 | 2.762  | 0.9825 |        |
| rs689462   | PTGS2 | flanking_5UTR | 1 | 183382740 | 0.05862   | 0.03693 | -0.01377 | 0.131    | 1.587    | 0.1129  | 0.8922  | 0.2687  | 0.2807  | 0.0697   | 0.7918   | 0.9413 | 0.6009 | 1.475  | 0.9936 |        |
| rs1930438  | IKBE  | flanking_5UTR | 1 | 203031501 | -0.002709 | 0.03989 | -0.07845 | 0.07429  | -0.05335 | 0.9575  | 0.9944  | 0.2388  | 0.2719  | 0.5455   | 0.4602   | 0.84   | 0.5286 | 1.335  | 0.9936 |        |
| rs17020312 | IKBE  | 5UTR          | 1 | 203032368 | -0.07735  | 0.03964 | -0.155   | 0.003336 | -1.951   | 0.05139 | 0.8922  | 0.2313  | 0.2281  | 0.005842 | 0.9391   | 1.019  | 0.6339 | 1.637  | 0.9978 |        |
| rs1539243  | IKBE  | coding        | 1 | 203036182 | -0.0761   | 0.04647 | -0.1672  | 0.01497  | -1.638   | 0.1019  | 0.8922  | 0.1642  | 0.1316  | 0.846    | 0.5777   | 1.296  | 0.7448 | 2.257  | 0.9825 |        |
| rs2297546  | IKBE  | intron        | 1 | 203036432 | -0.02734  | 0.04063 | -0.1074  | 0.05269  | -0.6697  | 0.5033  | 0.97555 | 0.2015  | 0.2251  | 0.3155   | 0.8684   | 0.5307 | 0.4252 | 1.421  | 0.9825 |        |
| rs2151222  | IKBE  | intron        | 1 | 203042663 | 0.01468   | 0.03749 | -0.05879 | 0.08815  | 0.3916   | 0.6955  | 0.97555 | 0.2239  | 0.2982  | 2.657    | 0.1031   | 0.6787 | 0.4252 | 1.083  | 0.9825 |        |
| rs10863389 | IKBE  | intron        | 1 | 203044687 | -0.009599 | 0.03645 | -0.08104 | 0.06184  | -0.2634  | 0.7924  | 0.9761  | 0.2687  | 0.2661  | 0.003263 | 0.9544   | 1.013  | 0.6454 | 1.591  | 0.9978 |        |
| rs1118087  | IKBE  | intron        | 1 | 203044972 | 0.004056  | 0.03218 | -0.04056 | 0.06069  | -0.1228  | 0.9023  | 0.9392  | 0.4328  | 0.3567  | 0.3272   | 0.1236   | 1.376  | 0.916  | 2.068  | 0.9825 |        |
| rs1118092  | IKBE  | intron        | 1 | 203045165 | 0.00244   | 0.05588 | -0.1071  | 0.112    | 0.04367  | 0.9652  | 0.9944  | 0.07463 | 0.0848  | 0.1323   | 0.716    | 0.8704 | 0.4119 | 1.839  | 0.9936 |        |
| rs10863430 | IKBE  | intron        | 1 | 203052802 | 0.03178   | 0.03523 | -0.03727 | 0.1008   | 0.902    | 0.3673  | 0.961   | 0.3358  | 0.3509  | 0.09637  | 0.7562   | 0.9354 | 0.6135 | 1.426  | 0.9936 |        |
| rs12026566 | IKBE  | intron        | 1 | 203055129 | -0.02598  | 0.03376 | -0.09214 | 0.04019  | -0.7695  | 0.4419  | 0.97555 | 0.3582  | 0.348   | 0.04446  | 0.833    | 1.046  | 0.689  | 1.588  | 0.9936 |        |
| rs17024891 | IKBE  | intron        | 1 | 203055198 | -0.03715  | 0.04322 | -0.1219  | 0.04756  | -0.8595  | 0.3904  | 0.961   | 0.1791  | 0.1696  | 0.06111  | 0.8047   | 1.068  | 0.6325 | 1.804  | 0.9936 |        |
| rs17025213 | IKBE  | intron        | 1 | 203056852 | -0.02858  | 0.03997 | -0.1069  | 0.04975  | -0.7151  | 0.4748  | 0.97555 | 0.1212  | 0.1257  | 0.01785  | 0.8937   | 0.9591 | 0.5197 | 1.77   | 0.9936 |        |
| rs944775   | IKBE  | intron        | 1 | 203056988 | 0.02252   | 0.03218 | -0.04056 | 0.0856   | 0.6997   | 0.4844  | 0.97555 | 0.5373  | 0.4766  | 1.419    | 0.2335   | 1.275  | 0.8545 | 1.903  | 0.9825 |        |
| rs3748022  | IKBE  | coding        | 1 | 203057860 | -0.01054  | 0.07145 | -0.1506  | 0.1295   | -0.1475  | 0.8828  | 0.9392  | 0.06716 | 0.05556 | 0.2343   | 0.6283   | 1.224  | 0.5393 | 2.778  | 0.9936 |        |
| rs11578093 | IKBE  | flanking_3UTR | 1 | 203059049 | 0.01564   | 0.0348  | -0.05256 | 0.08384  | 0.4496   | 0.6532  | 0.97555 | 0.3881  | 0.3596  | 0.3343   | 0.9532   | 1.129  | 0.7481 | 1.704  | 0.9825 |        |
| rs3024498  | IL10  | 3UTR          | 1 | 203329924 | 0.07851   | 0.051   | -0.02145 | 0.1785   | 1.539    | 0.1241  | 0.8922  | 0.1194  | 0.1294  | 0.08709  | 0.7679   | 0.9122 | 0.4953 | 1.68   | 0.9936 |        |
| rs3024494  | IL10  | intron        | 1 | 203331746 | 0.07534   | 0.0651  | -0.05225 | 0.2029   | 1.157    | 0.2475  | 0.958   | 0.0597  | 0.0848  | 0.8457   | 0.3578   | 0.6853 | 0.305  | 1.54   | 0.9825 |        |
| rs1878672  | IL10  | intron        | 1 | 203332108 | -0.04441  | 0.03496 | -0.1129  | 0.02411  | -1.27    | 0.2044  | 0.9444  | 0.291   | 0.3333  | 0.7894   | 0.8211   | 0.3313 | 0.5702 | 1.269  | 0.9825 |        |
| rs1554286  | IL10  | intron        | 1 | 203332628 | -0.04707  | 0.03326 | -0.1136  | 0.09292  | -1.386   | 0.1662  | 0.97555 | 0.4104  | 0.4123  | 0.001335 | 0.9708   | 0.9925 | 0.6613 | 1.489  | 0.9925 |        |
| rs4406706  | ATF3  | intron        | 1 | 209168866 | 0.06835   | 0.04494 | -0.01973 | 0.1564   | 1.521    | 0.1287  | 0.8922  | 0.1866  | 0.1901  | 0.007654 | 0.9303   | 0.9774 | 0.5859 | 1.631  | 0.9978 |        |
| rs10735510 | ATF3  | intron        | 1 | 209173855 | -0.0639   | 0.03754 | -0.1375  | 0.009677 | -1.702   | 0.08915 | 0.8922  | 0.2761  | 0.2456  | 0.4726   | 0.4918   | 1.172  | 0.7457 | 1.841  | 0.9825 |        |
| rs7516737  | ATF3  | intron        | 1 | 209174558 | 0.01515   | 0.03373 | -0.05095 | 0.08126  | 0.4492   | 0.6534  | 0.97555 | 0.4545  | 0.4942  | 0.5983   | 0.4392   | 0.8531 | 0.5702 | 1.276  | 0.9825 |        |
| rs6670133  | ATF3  | intron        | 1 | 209174645 | -0.01859  | 0.04257 | -0.102   | 0.06485  | -0.4366  | 0.6625  | 0.97555 | 0.2015  | 0.1824  | 0.2309   | 0.6309   | 1.131  | 0.6836 | 1.873  | 0.9936 |        |
| rs9429889  | ATF3  | intron        | 1 | 209177924 | -0.04306  | 0.03988 | -0.1212  | 0.03514  | -1.079   | 0.281   | 0.9582  | 0.2197  | 0.2574  | 0.7258   | 0.3943   | 0.8123 | 0.5033 | 1.311  | 0.9825 |        |
| rs1126526  | ATF3  | intron        | 1 | 209181900 | 0.04456   | 0.04803 | -0.04957 | 0.1387   | 0.9279   | 0.3538  | 0.961   | 0.1119  | 0.1316  | 0.3371   | 0.5615   | 0.8319 | 0.4467 | 1.549  | 0.9825 |        |
| rs10475    | ATF3  | 3UTR          | 1 | 209182008 | -0.003406 | 0.03763 | -0.07716 | 0.07034  | -0.09052 | 0.9279  | 0.9392  | 0.2612  | 0.2602  | 0.000461 | 0.9829   | 1.005  | 0.6377 | 1.584  | 0.9985 |        |
| rs11571588 | ATF3  | flanking_3UTR | 1 | 209182687 | 0.1182    | 0.0757  | -0.03016 | 0.2666   | 1.562    | 0.1188  | 0.8922  | 0.04478 | 0.04094 | 0.3528   | 0.851    | 1.023  | 0.4713 | 2.92   | 0.9936 |        |
| rs8679     | PARP1 | 3UTR          | 1 | 222855289 | 0.06594   | 0.06558 | -0.04258 | 0.2145   | 1.311    | 0.1904  | 0.9444  | 0.07463 | 0.0731  | 0.003297 | 0.9542   | 1.098  | 0.6202 | 2.191  | 0.9978 |        |
| rs752307   | PARP1 | intron        | 1 | 222858264 | 0.02396   | 0.0506  | -0.07521 | 0.1231   | 0.4735   | 0.636   | 0.97555 | 0.08209 | 0.114   | 1.045    | 0.3066   | 0.6948 | 0.3446 | 1.401  | 0.9825 |        |
| rs3219142  | PARP1 | intron        | 1 | 222858803 | -0.02034  | 0.07019 | -0.1579  | 0.1172   | -0.2897  | 0.7721  | 0.9761  | 0.07463 | 0.05556 | 0.6121   | 0.434    | 1.371  | 0.6202 | 3.031  | 0.9825 |        |
| rs3219110  | PARP1 | intron        | 1 | 222864613 | 0.000754  | 0.03431 | -0.0665  | 0.068    | 0.02197  | 0.9825  | 0.996   | 0.2985  | 0.3509  | 1.183    | 0.2767   | 0.7872 | 0.5113 | 1.212  | 0.9825 |        |
| rs1806410  | PARP1 | intron        | 1 | 222875400 | 0.03269   | 0.05266 | -0.07082 | 0.1359   | 0.6208   | 0.5349  | 0.97555 | 0.1045  | 0.09942 | 0.02721  | 0.869    | 1.057  | 0.5478 | 2.039  | 0.9936 |        |
| rs3219073  | PARP1 | intron        | 1 | 222876110 | -0.03341  | 0.03408 | -0.1002  | 0.03339  | -0.9802  | 0.3273  | 0.961   | 0.3881  | 0.3626  | 0.2684   | 0.6044   | 1.115  | 0.7388 | 1.682  | 0.9936 |        |
| rs1806415  | PARP1 | coding        | 1 | 222877575 | 0.02846   | 0.05474 | -0.07883 | 0.1358   | 0.5199   | 0.6033  | 0.97555 | 0.06716 | 0.07647 | 0.1217   | 0.8695   | 0.3963 | 0.3663 | 1.908  | 0.9936 |        |
| rs3219054  | PARP1 | intron        | 1 | 222880720 | -0.00886  | 0.06568 | -0.1376  | 0.1198   | -0.1353  | 0.8924  | 0.9392  | 0.1119  | 0.0614  | 3.517    | 0.06073  | 1.927  | 0.9614 | 3.861  | 0.9825 |        |
| rs3219045  | PARP1 | intron        | 1 | 222883920 | -0.07448  | 0.04261 | -0.158   | 0.009026 | -1.748   | 0.08088 | 0.8922  | 0.209   | 0.1725  | 0.8559   | 1.267    | 0.7659 | 2.093  | 0.9825 |        |        |
| rs2048424  | PARP1 | intron        | 1 | 222889742 | 0.01243   | 0.03208 | -0.05044 | 0.07529  | 0.3874   | 0.6986  | 0.97555 | 0.4848  | 0.4883  | 0.004552 | 0.9462   | 0.9863 | 0.6599 | 1.474  | 0.9978 |        |
| rs7594497  | PNP1  | coding        | 2 | 55784189  | -0.02336  | 0.03437 | -0.09071 | 0.044    | -0.6797  | 0.4969  | 0.97555 | 0.3582  | 0.348   | 0.04446  | 0.833    | 1.046  | 0.689  | 1.588  | 0.9936 |        |
| rs17800203 | PNP1  | intron        | 2 | 55795384  | -0.03863  | 0.05227 | -0.1411  | 0.06382  | -0.739   | 0.4601  | 0.97555 | 0.1045  | 0.09649 | 0.06901  | 0.7928   | 1.092  | 0.5648 | 2.113  | 0.9936 |        |
| rs12617829 | PNP1  | intron        | 2 | 55812968  | 0.07719   | 0.03572 | -0.0372  | 0.2668   | 1.497    | 0.1348  | 0.8922  | 0.03731 | 0.0731  | 2.088    | 0.1485   | 0.1841 | 1.312  | 0.9825 | 2.242  | 0.9825 |
| rs72572    | PNP1  | coding        | 2 | 55823771  | -0.03584  | 0.03423 | -0.1029  | 0.03125  | -1.047   | 0.2955  | 0.961   | 0.3806  | 0.3246  | 1.347    | 0.2459   | 1.279  | 0.8438 | 1.938  | 0.9825 |        |
| rs842648   | REL   | intron        | 2 | 61028132  | -0.002023 | 0.04574 | -0.09166 | 0.08762  | -0.04424 | 0.9647  | 0.9944  | 0.1716  | 0.1374  | 0.8986   | 0.3432   | 1.301  | 0.7546 | 2.242  | 0.9825 |        |
| rs6279789  | REL   | coding        | 2 | 61031122  | -0.03104  | 0.07176 | -0.1717  | 0.1096   | -0.4326  | 0.6654  | 0.97555 | 0.08209 | 0.3509  | 4.625    | 0.0315   | 2.459  | 1.058  | 5.719  | 0.9825 |        |
| rs13031237 | REL   | intron        | 2 | 61047760  | 0.01296   | 0.05383 | -0.09204 | 0.1185   | 0.2408   | 0.8077  | 0.9828  | 0.1119  | 0.1082  | 0.01394  | 0.906    | 1.039  | 0.55   | 1.963  | 0.9936 |        |
| rs9309331  | REL   | intron        | 2 | 61053266  | -0.02147  | 0.03958 | -0.09904 | 0.0561   | -0.5425  | 0.5877  | 0.97555 | 0.291   | 0.1813  | 6.938    | 0.008436 | 1.854  | 1.167  | 2.946  | 0.9825 |        |
| rs917225   | IL1R1 | flanking_5UTR | 2 | 102227820 | -0.0713   | 0.05262 | -0.1744  | 0.03184  | -1.355   | 0.1759  | 0.9335  | 0.1667  | 0.114   | 2.353    | 0.1251   | 1.554  | 0.882  | 2.738  | 0.9825 |        |
| rs2192752  | IL1R1 | flanking_5UTR | 2 | 102227891 | 0.01638   | 0.05166 | -0.1044  | 0.1372   | 0.2657   | 0.7905  | 0.9761  | 0.07463 | 0.05848 | 0.4251   | 0.5144   | 1.298  | 0.5911 | 2.852  | 0.9825 |        |
| rs949963   | IL1R1 | flanking_5UTR | 2 | 102228304 | 0.01013   | 0.03568 | -0.05981 | 0.08007  | 0.2839   | 0.7765  | 0.9761  | 0.2761  | 0.2953  | 0.1724   | 0.6779   | 0.9102 | 0.5837 | 1.419  | 0.9936 |        |
| rs871658   | IL1R1 | intron        | 2 | 102230383 | 0.01219   | 0       |          |          |          |         |         |         |         |          |          |        |        |        |        |        |

|            |       |               |   |           |           |         |           |           |          |          |        |         |         |          |         |        |        |        |        |        |
|------------|-------|---------------|---|-----------|-----------|---------|-----------|-----------|----------|----------|--------|---------|---------|----------|---------|--------|--------|--------|--------|--------|
| rs287047   | IL1R1 | intron        | 2 | 102232572 | -0.05611  | 0.03277 | -0.1203   | 0.00811   | -1.712   | 0.08725  | 0.8922 | 0.4778  | 0.4064  | 0.6759   | 0.411   | 1.184  | 0.7913 | 1.772  | 0.9825 |        |
| rs3917242  | IL1R1 | intron        | 2 | 102232786 | -0.1179   | 0.06727 | -0.01395  | 0.2498    | 0.8801   | 0.0870   | 0.8922 | 0.05224 | 0.06725 | 0.3674   | 0.5444  | 0.7645 | 0.3201 | 1.826  | 0.9825 |        |
| rs3917243  | IL1R1 | intron        | 2 | 102233006 | -0.08634  | 0.04165 | -0.168    | -0.004716 | -2.073   | 0.03851  | 0.8922 | 0.194   | 0.2047  | 0.0678   | 0.7946  | 0.9354 | 0.5661 | 1.546  | 0.9936 |        |
| rs3917254  | IL1R1 | intron        | 2 | 102235036 | 0.01835   | 0.03528 | -0.05081  | 0.0875    | 0.52     | 0.6032   | 0.9755 | 0.3134  | 0.2953  | 0.1503   | 0.6983  | 1.089  | 0.7067 | 1.679  | 0.9936 |        |
| rs3917273  | IL1R1 | intron        | 2 | 102238237 | 0.02366   | 0.03952 | -0.05381  | 0.1011    | 0.5985   | 0.5497   | 0.9755 | 0.194   | 0.2281  | 0.6534   | 0.4189  | 0.8148 | 0.4956 | 1.34   | 0.9825 |        |
| rs3917289  | IL1R1 | intron        | 2 | 102240429 | -0.01957  | 0.04382 | -0.1055   | 0.06632   | -0.4466  | 0.6553   | 0.9755 | 0.1343  | 0.1813  | 0.1518   | 0.2179  | 0.7008 | 0.3972 | 1.236  | 0.9825 |        |
| rs997049   | IL1R1 | intron        | 2 | 102240951 | 0.01854   | 0.04588 | -0.07138  | 0.1085    | 0.4041   | 0.6863   | 0.9755 | 0.1343  | 0.1696  | 0.8922   | 0.3449  | 0.7598 | 0.4292 | 1.345  | 0.9825 |        |
| rs2160227  | IL1R1 | intron        | 2 | 102241873 | -0.007348 | 0.03273 | -0.0715   | 0.05881   | -0.2245  | 0.8224   | 0.985  | 0.4701  | 0.5263  | 1.215    | 0.2703  | 0.7986 | 0.5352 | 1.192  | 0.9825 |        |
| rs3917306  | IL1R1 | intron        | 2 | 102247357 | -0.01519  | 0.03273 | -0.09162  | 0.06123   | 0.03899  | 0.6969   | 0.9755 | 0.2463  | 0.1988  | 1.296    | 0.2549  | 1.317  | 0.8193 | 2.116  | 0.9825 |        |
| rs3917308  | IL1R1 | intron        | 2 | 102248216 | -0.04852  | 0.05085 | -0.1482   | 0.05114   | -0.9542  | 0.3403   | 0.961  | 0.1288  | 0.09357 | 1.275    | 0.2589  | 1.432  | 0.7658 | 2.678  | 0.9825 |        |
| rs3917318  | IL1R1 | intron        | 2 | 102251278 | 0.009472  | 0.03598 | -0.06105  | 0.08      | 0.2632   | 0.7924   | 0.9761 | 0.2761  | 0.2895  | 0.08413  | 0.7718  | 0.9363 | 0.6    | 1.461  | 0.9936 |        |
| rs3917320  | IL1R1 | coding        | 2 | 102251393 | -0.03152  | 0.06052 | -0.101    | 0.08709   | -0.5209  | 0.6026   | 0.9761 | 0.08955 | 0.08772 | 0.004021 | 0.9494  | 1.023  | 0.5073 | 2.063  | 0.9978 |        |
| rs2110726  | IL1R1 | 3UTR          | 2 | 102252800 | 0.02398   | 0.05786 | -0.08942  | 0.1374    | 0.4145   | 0.6787   | 0.9755 | 0.1045  | 0.1082  | 0.01385  | 0.9063  | 0.9617 | 0.5019 | 1.843  | 0.9936 |        |
| rs3917327  | IL1R1 | 3UTR          | 2 | 102252897 | -0.06091  | 0.06996 | -0.218    | 0.0562    | -1.157   | 0.2478   | 0.958  | 0.05224 | 0.0731  | 0.6681   | 0.4137  | 0.6989 | 0.2949 | 1.657  | 0.9825 |        |
| rs3732131  | IL1R1 | 3UTR          | 2 | 102253121 | -0.02483  | 0.0335  | -0.1117   | 0.06203   | -0.5603  | 0.5755   | 0.9755 | 0.1866  | 0.155   | 0.7015   | 0.4023  | 0.251  | 0.7405 | 2.112  | 0.9825 |        |
| rs3917332  | IL1R1 | flanking_3UTR | 2 | 102255042 | 0.002598  | 0.05016 | -0.09572  | 0.1009    | 0.05179  | 0.9587   | 0.944  | 0.08955 | 0.1118  | 0.5026   | 0.4784  | 0.7817 | 0.3951 | 1.546  | 0.9825 |        |
| rs4251961  | IL1RN | flanking_5UTR | 2 | 113590698 | 0.01853   | 0.04276 | -0.06528  | 0.1023    | 0.4333   | 0.6649   | 0.9755 | 0.1567  | 0.1462  | 0.08392  | 0.7721  | 1.085  | 0.6237 | 1.889  | 0.9936 |        |
| rs315919   | IL1RN | intron        | 2 | 113592444 | 0.02143   | 0.0335  | -0.04424  | 0.08709   | 0.6396   | 0.5227   | 0.9755 | 0.4478  | 0.5351  | 0.7045   | 0.08651 | 0.7045 | 0.4716 | 1.052  | 0.9825 |        |
| rs2254511  | IL1RN | intron        | 2 | 113593053 | 0.02176   | 0.05211 | -0.08038  | 0.1239    | 0.4176   | 0.6764   | 0.9755 | 0.1045  | 0.1287  | 0.526    | 0.4683  | 0.7902 | 0.4176 | 1.495  | 0.9825 |        |
| rs3213448  | IL1RN | intron        | 2 | 113595528 | 0.02763   | 0.03945 | -0.0497   | 0.105     | 0.7003   | 0.4839   | 0.9755 | 0.2388  | 0.2602  | 0.2332   | 0.6292  | 0.8918 | 0.5603 | 1.42   | 0.9936 |        |
| rs315934   | IL1RN | intron        | 2 | 113599937 | -0.0907   | 0.05573 | -0.1999   | 0.01852   | -1.628   | 0.1041   | 0.8922 | 0.1642  | 0.1111  | 2.461    | 0.1167  | 1.571  | 0.8905 | 2.773  | 0.9825 |        |
| rs432014   | IL1RN | intron        | 2 | 113604810 | -0.02018  | 0.04271 | -0.1039   | 0.06353   | -0.4725  | 0.6367   | 0.9755 | 0.1343  | 0.1588  | 0.4477   | 0.5034  | 0.8218 | 0.4623 | 1.461  | 0.9825 |        |
| rs380092   | IL1RN | intron        | 2 | 113605131 | -0.009011 | 0.03496 | -0.07754  | 0.05951   | -0.2577  | 0.7967   | 0.9761 | 0.3134  | 0.2982  | 0.1052   | 0.7456  | 1.074  | 0.6971 | 1.655  | 0.9936 |        |
| rs431726   | IL1RN | intron        | 2 | 113605237 | 0.01469   | 0.04802 | -0.1088   | 0.07942   | -0.3059  | 0.7597   | 0.9761 | 0.1269  | 0.1147  | 1.161    | 0.1364  | 0.7119 | 1.121  | 0.6103 | 2.06   | 0.9936 |
| rs315955   | IL1RN | intron        | 2 | 113605661 | 0.07883   | 0.06042 | -0.03959  | 0.1972    | 1.305    | 0.1924   | 0.9444 | 0.0597  | 0.1088  | 2.699    | 0.1004  | 0.5199 | 0.2355 | 1.148  | 0.9825 |        |
| rs315952   | IL1RN | coding        | 2 | 113606535 | 0.009341  | 0.0324  | -0.05417  | 0.07285   | 0.2883   | 0.7732   | 0.9761 | 0.4701  | 0.4324  | 0.5965   | 0.4557  | 1.165  | 0.7798 | 1.74   | 0.9825 |        |
| rs397211   | IL1RN | flanking_3UTR | 2 | 113608372 | -0.01038  | 0.04446 | -0.09751  | 0.07676   | -0.2334  | 0.8155   | 0.9844 | 0.1493  | 0.1257  | 0.4639   | 0.4958  | 1.22   | 0.688  | 2.163  | 0.9825 |        |
| rs315949   | IL1RN | flanking_3UTR | 2 | 113609005 | -0.001123 | 0.03377 | -0.0673   | 0.06506   | -0.03226 | 0.9735   | 0.9944 | 0.3209  | 0.3509  | 0.3843   | 0.5353  | 0.8742 | 0.5713 | 1.338  | 0.9825 |        |
| rs17036283 | PPARG | intron        | 3 | 12328275  | 0.05761   | 0.06581 | -0.07137  | 0.1866    | 0.8754   | 0.3816   | 0.961  | 0.0597  | 0.08772 | 1.029    | 0.3104  | 0.6603 | 0.2947 | 1.48   | 0.9825 |        |
| rs13073869 | PPARG | intron        | 3 | 12328993  | 0.06825   | 0.04026 | -0.01065  | 0.1471    | 1.695    | 0.09044  | 0.8922 | 0.2239  | 0.2176  | 0.02181  | 0.8826  | 1.037  | 0.641  | 1.677  | 0.9936 |        |
| rs4136304  | PPARG | intron        | 3 | 12369601  | 0.04596   | 0.03456 | -0.02177  | 0.1137    | 1.33     | 0.1839   | 0.9444 | 0.3409  | 0.45    | 4.647    | 0.03111 | 0.6322 | 0.416  | 0.9607 | 0.9825 |        |
| rs189951   | PPARG | intron        | 3 | 12369840  | -0.06925  | 0.03388 | -0.1357   | -0.002844 | -2.044   | 0.04133  | 0.8922 | 0.4552  | 0.386   | 1.916    | 0.1663  | 1.329  | 0.8878 | 1.991  | 0.9825 |        |
| rs4136306  | PPARG | intron        | 3 | 12371444  | -0.005328 | 0.0543  | -0.1118   | 0.1011    | -0.09811 | 0.9219   | 0.9392 | 0.1119  | 0.1353  | 0.4675   | 0.4941  | 0.8056 | 0.4332 | 1.498  | 0.9825 |        |
| rs4136247  | PPARG | intron        | 3 | 12371588  | -0.1099   | 0.03874 | -0.1858   | -0.03396  | -2.837   | 0.004691 | 0.8526 | 0.2985  | 0.2193  | 3.297    | 0.06942 | 1.515  | 0.9659 | 2.376  | 0.9825 |        |
| rs4136314  | PPARG | intron        | 3 | 12383666  | 0.05545   | 0.0648  | -0.07155  | 0.1825    | 0.8558   | 0.3924   | 0.961  | 0.08955 | 0.09942 | 0.1073   | 0.7433  | 0.891  | 0.4466 | 1.778  | 0.9936 |        |
| rs2959273  | PPARG | intron        | 3 | 12405075  | -0.006039 | 0.04337 | -0.09103  | 0.07896   | -0.1393  | 0.8893   | 0.9392 | 0.1866  | 0.1345  | 2.056    | 0.1516  | 1.476  | 0.865  | 2.518  | 0.9825 |        |
| rs4136336  | PPARG | intron        | 3 | 12412396  | 0.05802   | 0.06476 | -0.06891  | 0.185     | 0.896    | 0.3706   | 0.961  | 0.02985 | 0.0614  | 1.926    | 0.1652  | 0.4703 | 0.1584 | 1.397  | 0.9825 |        |
| rs2959272  | PPARG | intron        | 3 | 12417731  | 0.01104   | 0.03402 | -0.07773  | 0.05564   | -0.3245  | 0.7456   | 0.9755 | 0.2239  | 0.1725  | 1.671    | 0.1961  | 1.384  | 0.8446 | 2.267  | 0.9825 |        |
| rs4136275  | PPARG | intron        | 3 | 12418844  | -0.1218   | 0.06399 | -0.2472   | 0.003594  | -1.904   | 0.05734  | 0.8922 | 0.08955 | 0.04971 | 2.672    | 0.1022  | 1.88   | 0.8726 | 4.052  | 0.9825 |        |
| rs796290   | PPARG | intron        | 3 | 12424683  | -0.03008  | 0.03685 | -0.1023   | 0.04215   | -0.8163  | 0.4146   | 0.9755 | 0.1119  | 0.117   | 0.02373  | 0.8776  | 0.9517 | 0.5068 | 1.787  | 0.9825 |        |
| rs4136284  | PPARG | intron        | 3 | 12424866  | -0.0611   | 0.05201 | -0.163    | 0.04083   | -1.175   | 0.2405   | 0.9501 | 0.1269  | 0.1316  | 0.01888  | 0.8907  | 0.959  | 0.5276 | 1.934  | 0.9825 |        |
| rs1175542  | PPARG | intron        | 3 | 12441214  | -0.09653  | 0.04067 | -0.1762   | -0.01881  | -2.373   | 0.0179   | 0.8922 | 0.2313  | 0.1579  | 3.541    | 0.05987 | 1.605  | 0.9778 | 2.635  | 0.9825 |        |
| rs1175544  | PPARG | intron        | 3 | 12442044  | 0.01998   | 0.04719 | -0.07251  | 0.1125    | 0.4233   | 0.6722   | 0.9755 | 0.1119  | 0.117   | 0.02373  | 0.8776  | 0.9517 | 0.5068 | 1.787  | 0.9936 |        |
| rs4136356  | PPARG | intron        | 3 | 12442613  | 0.05193   | 0.03635 | -0.01932  | 0.1232    | 1.428    | 0.1536   | 0.923  | 0.2836  | 0.3216  | 0.6508   | 0.4198  | 0.8348 | 0.5383 | 1.295  | 0.9825 |        |
| rs1797912  | PPARG | intron        | 3 | 12445239  | 0.04318   | 0.03734 | -0.03     | 0.1164    | 1.157    | 0.2478   | 0.958  | 0.2164  | 0.2602  | 0.9914   | 0.3194  | 0.7851 | 0.4874 | 1.265  | 0.9825 |        |
| rs3856806  | PPARG | coding        | 3 | 12450557  | 0.07977   | 0.06982 | -0.05708  | 0.2166    | 1.142    | 0.5613   | 0.958  | 0.0597  | 0.04678 | 0.3356   | 0.5624  | 1.294  | 0.5402 | 3.098  | 0.9825 |        |
| rs3918370  | CCR2  | intron        | 3 | 46369156  | -0.02382  | 0.04098 | -0.1041   | 0.0565    | -0.5812  | 0.2513   | 0.9755 | 0.2164  | 0.1842  | 0.6405   | 0.4235  | 1.223  | 0.7465 | 2.004  | 0.9825 |        |
| rs3918358  | CCR2  | intron        | 3 | 46369423  | 0.01577   | 0.03503 | -0.0529   | 0.08443   | 0.45     | 0.6529   | 0.9755 | 0.3258  | 0.3392  | 0.07689  | 0.7814  | 0.9413 | 0.614  | 1.443  | 0.9936 |        |
| rs3092962  | CCR2  | intron        | 3 | 46372043  | 0.06114   | 0.05172 | -0.04023  | 0.1625    | 1.182    | 0.2375   | 0.9444 | 0.09701 | 0.1404  | 1.618    | 0.2033  | 0.6581 | 0.3441 | 1.258  | 0.9825 |        |
| rs3092961  | CCR2  | intron        | 3 | 46372444  | 0.02256   | 0.03763 | -0.0512   | 0.09632   | 0.5995   | 0.549    | 0.9755 | 0.2761  | 0.2427  | 0.5706   | 0.45    | 1.19   | 0.7572 | 1.871  | 0.9825 |        |
| rs1799864  | CCR2  | coding        | 3 | 46374212  | -0.018    | 0.04595 | -0.1081   | 0.07205   | -0.3918  | 0.6953   | 0.9755 | 0.1136  | 0.1637  | 1.878    | 0.1706  | 0.6548 | 0.3561 | 1.204  | 0.9825 |        |
| rs3918386  | CCR2  | intron        | 3 | 46376247  | -0.06245  | 0.06982 | -0.1444   | 0.01946   | -1.494   | 0.1355   | 0.8922 | 0.209   | 0.1834  | 0.4051   | 0.5245  | 1.176  | 0.7137 | 1.937  | 0.9825 |        |
| rs5743849  | TLR9  | flanking_3UTR | 3 | 52229756  | 0.01881   | 0.07009 | -0.1186   | 0.1562    | 0.2684   | 0.7885   | 0.9761 | 0.0597  | 0.04971 | 0.1932   | 0.6602  | 1.214  | 0.511  | 2.883  | 0.9936 |        |
| rs521140   | TLR9  | coding        | 3 | 52231737  | 0.05738   | 0.0332  | -0.007683 | 0.1224    | 1.729    | 0.08433  | 0.8922 | 0.403   | 0.3684  | 0.4891   | 1.157   | 0.7686 | 1.742  | 0.9825 |        |        |
| rs5743838  | TLR9  | flanking_5UTR | 3 | 52235638  | 0.002638  | 0.06395 | -0.1227   | 0.1279    | 0.0407   | 0.9675   | 0.9444 | 0.0597  | 0.07647 | 0.524    | 0.7668  | 0.3381 | 0.4059 | 1.739  | 0.9825 |        |
| rs1483185  | PRKCD | intron        | 3 | 53174054  | 0.01613   | 0.0344  | -0.0513   | 0.08356   | 0.4688   | 0.6393   | 0.9755 | 0.3657  | 0.3772  | 0.05459  | 0.8153  | 0.9518 | 0.6292 | 1.44   | 0.9936 |        |
| rs750170   | PRKCD | intron        | 3 | 53176938  | -0.001333 | 0.04678 | -0.09303  | 0.09036   | -0.0285  | 0.9773   | 0.951  | 0       |         |          |         |        |        |        |        |        |

|            |        |               |           |           |         |          |           |          |         |        |         |         |          |         |        |        |        |        |
|------------|--------|---------------|-----------|-----------|---------|----------|-----------|----------|---------|--------|---------|---------|----------|---------|--------|--------|--------|--------|
| rs17052819 | PRKCD  | intron        | 531197173 | 0.02087   | 0.04425 | -0.06587 | 0.1076    | 0.4716   | 0.6374  | 0.9755 | 0.1269  | 0.3275  | 2.477    | 0.1156  | 0.6311 | 0.3545 | 1.124  | 0.9825 |
| rs3773729  | PRKCD  | intron        | 53179885  | 0.01484   | 0.03455 | -0.05288 | 0.08256   | 0.4296   | 0.6676  | 0.9755 | 0.3284  | 0.375   | 0.000333 | 0.9854  | 1.004  | 0.6561 | 1.536  | 0.9895 |
| rs6778964  | PRKCD  | intron        | 53183822  | 0.01329   | 0.03245 | -0.05031 | 0.0769    | 0.4097   | 0.6822  | 0.9755 | 0.4254  | 0.386   | 0.6246   | 0.4294  | 1.178  | 0.7849 | 1.767  | 0.9825 |
| rs17052826 | PRKCD  | intron        | 53187756  | -0.04925  | 0.05371 | -0.1545  | 0.05602   | -0.9169  | 0.3595  | 0.961  | 0.1194  | 0.09357 | 0.7088   | 0.3999  | 1.314  | 0.6951 | 2.482  | 0.9825 |
| rs11130380 | PRKCD  | intron        | 53190915  | -0.04754  | 0.0386  | -0.1232  | 0.02813   | -1.231   | 0.2186  | 0.9444 | 0.2612  | 0.2251  | 0.6953   | 0.4044  | 1.217  | 0.767  | 1.93   | 0.9825 |
| rs13084863 | PRKCD  | intron        | 53191732  | -0.06953  | 0.03538 | -0.1389  | -0.000189 | -1.965   | 0.04977 | 0.8922 | 0.3134  | 0.2778  | 0.5971   | 0.4397  | 1.187  | 0.7683 | 1.834  | 0.9825 |
| rs2306572  | PRKCD  | intron        | 53192453  | 0.09499   | 0.04802 | 0.000869 | 0.1891    | 1.978    | 0.04831 | 0.8922 | 0.1119  | 0.152   | 1.28     | 0.2578  | 0.703  | 0.3809 | 1.297  | 0.9825 |
| rs17052830 | PRKCD  | intron        | 53192990  | 0.07538   | 0.05459 | -0.03161 | 0.1824    | 1.381    | 0.1677  | 0.9309 | 0.1045  | 0.09064 | 0.2153   | 0.6427  | 1.17   | 0.6017 | 2.277  | 0.9936 |
| rs2306574  | PRKCD  | coding        | 53197801  | -0.009856 | 0.03459 | -0.08138 | 0.06167   | -0.2701  | 0.7872  | 0.9761 | 0.2612  | 0.3012  | 0.7474   | 0.3873  | 0.8203 | 0.5234 | 1.286  | 0.9825 |
| rs900495   | PRKCD  | coding        | 53199042  | -0.0339   | 0.04315 | -0.1185  | 0.05068   | -0.7856  | 0.4324  | 0.9755 | 0.1567  | 0.1842  | 0.5008   | 0.4792  | 0.823  | 0.4796 | 1.412  | 0.9825 |
| rs7643235  | PRKCD  | flanking_3UTR | 53202468  | 0.009805  | 0.03411 | -0.05705 | 0.07866   | 0.2875   | 0.7738  | 0.9761 | 0.1334  | 0.3275  | 0.8687   | 0.7682  | 0.9375 | 0.6103 | 1.44   | 0.9936 |
| rs729396   | PRKCD  | flanking_3UTR | 53203382  | -0.0369   | 0.03373 | -0.1422  | 0.06841   | -0.6867  | 0.4925  | 0.9761 | 0.1194  | 0.09357 | 0.7088   | 0.3999  | 1.314  | 0.6951 | 2.482  | 0.9825 |
| rs16861194 | ADIPOQ | flanking_5UTR | 188042127 | -0.02543  | 0.03758 | -0.09909 | 0.04822   | -0.6768  | 0.4988  | 0.9755 | 0.2164  | 0.2661  | 1.259    | 0.2618  | 0.7618 | 0.4733 | 1.226  | 0.9825 |
| rs182052   | ADIPOQ | intron        | 188043484 | -0.01665  | 0.03315 | -0.08162 | 0.04832   | -0.5023  | 0.6156  | 0.9755 | 0.3433  | 0.3538  | 0.04676  | 0.8288  | 0.9547 | 0.4733 | 1.453  | 0.9936 |
| rs16861205 | ADIPOQ | intron        | 188044336 | -0.01526  | 0.0402  | -0.09405 | 0.06353   | -0.3793  | 0.7044  | 0.9755 | 0.1642  | 0.2206  | 0.1704   | 0.694   | 0.894  | 0.411  | 1.172  | 0.9825 |
| rs16861210 | ADIPOQ | intron        | 188049200 | -0.01601  | 0.04226 | -0.09884 | 0.06681   | -0.3789  | 0.7049  | 0.9755 | 0.1716  | 0.1871  | 0.1547   | 0.6941  | 0.9001 | 0.6325 | 1.521  | 0.9936 |
| rs822396   | ADIPOQ | intron        | 188049579 | -0.002638 | 0.04303 | -0.08698 | 0.08171   | -0.06129 | 0.9511  | 0.9944 | 0.1716  | 0.1667  | 0.01704  | 0.8961  | 1.036  | 0.6089 | 1.763  | 0.9936 |
| rs12495941 | ADIPOQ | intron        | 188050882 | -0.002714 | 0.03378 | -0.06892 | 0.06349   | -0.08036 | 0.936   | 0.9932 | 0.3939  | 0.3743  | 0.1565   | 0.6924  | 1.087  | 0.7197 | 1.641  | 0.9936 |
| rs9877202  | ADIPOQ | intron        | 188052309 | 0.02916   | 0.04996 | -0.06877 | 0.1271    | 0.5835   | 0.5597  | 0.9755 | 0.1045  | 0.1257  | 0.4126   | 0.5207  | 0.8112 | 0.4281 | 1.537  | 0.9825 |
| rs3821799  | ADIPOQ | intron        | 188054188 | 0.01105   | 0.03311 | -0.05384 | 0.07593   | 0.3338   | 0.7387  | 0.9755 | 0.4627  | 0.3626  | 4.053    | 0.04408 | 1.514  | 1.01   | 2.269  | 0.9825 |
| rs1063539  | ADIPOQ | 3UTR          | 188058094 | -0.03678  | 0.07392 | -0.2287  | 0.06111   | -1.133   | 0.2574  | 0.968  | 0.09701 | 0.04386 | 4.914    | 0.02665 | 2.342  | 1.083  | 5.066  | 0.9825 |
| rs9842733  | ADIPOQ | 3UTR          | 188058184 | 0.06672   | 0.06105 | -0.02294 | 0.2164    | 1.584    | 0.1136  | 0.8922 | 0.0597  | 0.09649 | 1.655    | 0.1982  | 0.5945 | 0.2672 | 1.323  | 0.9825 |
| rs1043697  | ADIPOQ | flanking_3UTR | 188059395 | 0.05542   | 0.05119 | -0.04492 | 0.1558    | 1.082    | 0.2794  | 0.9582 | 0.1269  | 0.1433  | 0.2171   | 0.6413  | 0.8688 | 0.4807 | 1.57   | 0.9936 |
| rs7694115  | TLR10  | intron        | 38601660  | -0.01086  | 0.03224 | -0.07436 | 0.05263   | -0.3354  | 0.7375  | 0.9755 | 0.4403  | 0.4825  | 0.6868   | 0.4072  | 0.8439 | 1.261  | 0.9825 |        |
| rs4130727  | TLR10  | intron        | 38603679  | 0.02667   | 0.04342 | -0.05843 | 0.1118    | 0.6142   | 0.5393  | 0.9755 | 0.209   | 0.1735  | 0.805    | 0.3696  | 1.258  | 0.7614 | 2.079  | 0.9825 |
| rs4264663  | TLR1   | 3UTR          | 38620442  | -0.03106  | 0.06471 | -0.1579  | 0.09578   | -0.48    | 0.6314  | 0.9755 | 0.06716 | 0.0731  | 0.05113  | 0.8211  | 0.913  | 0.4145 | 2.011  | 0.9936 |
| rs4743615  | TLR1   | coding        | 38621435  | -0.01244  | 0.06137 | -0.1327  | 0.1078    | -0.2028  | 0.8394  | 0.9856 | 0.08209 | 0.06471 | 0.4484   | 0.5031  | 1.293  | 0.6087 | 2.745  | 0.9825 |
| rs5743612  | TLR1   | coding        | 38622667  | 0.1373    | 0.06448 | 0.01094  | 0.2637    | 2.13     | 0.03355 | 0.8922 | 0.07463 | 0.07895 | 0.92507  | 0.8742  | 0.9409 | 0.4423 | 2.001  | 0.9936 |
| rs5743604  | TLR1   | intron        | 38623851  | 0.0035    | 0.03277 | -0.06074 | 0.06773   | 0.1068   | 0.915   | 0.9932 | 0.4478  | 0.4912  | 0.7289   | 0.3932  | 0.8398 | 0.5623 | 1.254  | 0.9825 |
| rs4743599  | TLR1   | intron        | 38624730  | 0.01911   | 0.0492  | -0.07733 | 0.1156    | 0.3884   | 0.6978  | 0.9755 | 0.1818  | 0.1316  | 1.333    | 0.1645  | 1.467  | 0.8529 | 2.522  | 0.9825 |
| rs5743567  | TLR1   | intron        | 38628406  | 0.03379   | 0.04203 | -0.04859 | 0.1162    | 0.8039   | 0.4217  | 0.9755 | 0.209   | 0.1959  | 0.1026   | 0.7487  | 1.084  | 0.6611 | 1.778  | 0.9936 |
| rs5743553  | TLR1   | flanking_5UTR | 38629755  | -0.02929  | 0.04776 | -0.06431 | 0.1229    | 0.6133   | 0.5399  | 0.9755 | 0.1418  | 0.1404  | 0.001651 | 0.9676  | 1.012  | 0.5704 | 1.795  | 0.9936 |
| rs5743551  | TLR1   | flanking_5UTR | 38630220  | 0.03868   | 0.03863 | -0.1144  | 0.03703   | 0.317    | 0.961   | 0.961  | 0.2463  | 0.2661  | 0.1962   | 0.9012  | 0.5687 | 1.428  | 0.9936 |        |
| rs2381289  | TLR6   | flanking_3UTR | 38649437  | 0.02145   | 0.03696 | -0.05099 | 0.09389   | 0.5804   | 0.5618  | 0.9755 | 0.2388  | 0.2836  | 0.9789   | 0.3225  | 0.9224 | 0.4995 | 1.257  | 0.9825 |
| rs5743833  | TLR6   | flanking_3UTR | 38649532  | -0.0458   | 0.06391 | -0.1711  | 0.07945   | -0.7167  | 0.4738  | 0.9755 | 0.07463 | 0.07895 | 0.92507  | 0.8742  | 0.9409 | 0.4423 | 2.001  | 0.9936 |
| rs5743808  | TLR6   | flanking_3UTR | 38649980  | 0.04323   | 0.0424  | -0.03986 | 0.1263    | 1.02     | 0.3082  | 0.961  | 0.2015  | 0.1725  | 0.5461   | 0.4599  | 1.21   | 0.7291 | 2.009  | 0.9825 |
| rs5743828  | TLR6   | flanking_3UTR | 38650086  | -0.004063 | 0.05162 | -0.1082  | 0.09711   | -0.0787  | 0.9373  | 0.9932 | 0.06716 | 0.114   | 2.333    | 0.1267  | 0.5994 | 0.2631 | 1.189  | 0.9825 |
| rs3821985  | TLR6   | coding        | 38652578  | -0.03708  | 0.03322 | -0.1022  | 0.02803   | -1.116   | 0.2647  | 0.9582 | 0.4403  | 0.4088  | 0.3915   | 0.5315  | 1.138  | 0.7596 | 1.704  | 0.9825 |
| rs743808   | TLR6   | coding        | 38653302  | 0.008213  | 0.06409 | -0.1174  | 0.1338    | 0.1281   | 0.8981  | 0.9932 | 0.08955 | 0.08187 | 0.07379  | 0.7859  | 1.103  | 0.5435 | 2.239  | 0.9936 |
| rs1039560  | TLR6   | flanking_5UTR | 38654070  | -0.03271  | 0.03886 | -0.1089  | 0.04344   | -0.8418  | 0.4002  | 0.961  | 0.2687  | 0.2339  | 0.6304   | 0.4272  | 1.203  | 0.762  | 1.899  | 0.9825 |
| rs2227532  | IL8    | flanking_5UTR | 74970567  | -0.05442  | 0.06339 | -0.1787  | 0.06981   | -0.8586  | 0.3909  | 0.961  | 0.07463 | 0.05848 | 0.4251   | 0.5144  | 1.298  | 0.5911 | 2.852  | 0.9825 |
| rs4073     | IL8    | flanking_5UTR | 74971059  | 0.001739  | 0.04094 | -0.0785  | 0.08198   | 0.04249  | 0.9661  | 0.9944 | 0.2687  | 0.1754  | 5.196    | 0.02264 | 1.727  | 1.076  | 2.77   | 0.9825 |
| rs4647980  | NFKB1  | intron        | 103797278 | 0.08241   | 0.05864 | -0.03251 | 0.1973    | 1.405    | 0.1603  | 0.923  | 0.08209 | 0.114   | 1.045    | 0.3066  | 0.6948 | 0.3446 | 1.401  | 0.9825 |
| rs4647992  | NFKB1  | intron        | 103812532 | 0.03097   | 0.05864 | -0.08397 | 0.1459    | 0.5281   | 0.5976  | 0.9755 | 0.1343  | 0.09357 | 1.702    | 0.1921  | 1.503  | 0.8122 | 2.782  | 0.9825 |
| rs230525   | NFKB1  | intron        | 103816062 | 0.02123   | 0.04036 | -0.05787 | 0.1003    | 0.5281   | 0.599   | 0.9755 | 0.1591  | 0.2456  | 4.135    | 0.04202 | 0.5811 | 0.3429 | 0.9847 | 0.9825 |
| rs4648004  | NFKB1  | intron        | 103818291 | 0.005034  | 0.05641 | -0.1055  | 0.1156    | 0.8924   | 0.9289  | 0.9932 | 0.1119  | 0.1053  | 0.04487  | 0.8322  | 1.071  | 0.5658 | 2.029  | 0.9936 |
| rs4648006  | NFKB1  | intron        | 103818743 | 0.03871   | 0.04911 | -0.05755 | 0.135     | 0.7868   | 0.4308  | 0.9755 | 0.1866  | 0.1199  | 3.585    | 0.05831 | 1.684  | 0.9778 | 2.899  | 0.9825 |
| rs4648045  | NFKB1  | intron        | 103865896 | 0.01937   | 0.03911 | -0.05705 | 0.0958    | 0.4968   | 0.6195  | 0.9755 | 0.2388  | 0.2573  | 0.1748   | 0.6758  | 0.9055 | 0.5686 | 1.442  | 0.9825 |
| rs3821958  | NFKB1  | intron        | 103866017 | 0.03437   | 0.03388 | -0.03203 | 0.1008    | 1.014    | 0.3107  | 0.961  | 0.403   | 0.4357  | 0.4206   | 0.5167  | 0.8743 | 0.5826 | 1.312  | 0.9825 |
| rs4648049  | NFKB1  | intron        | 103871930 | 0.04695   | 0.04976 | -0.05057 | 0.1445    | 0.9437   | 0.3457  | 0.961  | 0.1418  | 0.1287  | 0.1447   | 0.7037  | 1.119  | 0.6268 | 1.997  | 0.9825 |
| rs4648064  | NFKB1  | intron        | 103873930 | 0.0219    | 0.06089 | -0.09743 | 0.1412    | 0.3597   | 0.7192  | 0.9755 | 0.06716 | 0.1111  | 2.089    | 0.1483  | 0.576  | 0.2705 | 1.227  | 0.9936 |
| rs4648069  | NFKB1  | intron        | 103875672 | 0.002196  | 0.05702 | -0.1096  | 0.1139    | 0.03851  | 0.9693  | 0.9944 | 0.1119  | 0.09649 | 0.2534   | 0.6147  | 1.18   | 0.6187 | 2.252  | 0.9936 |
| rs3755867  | NFKB1  | intron        | 103883867 | 0.02837   | 0.03615 | -0.04249 | 0.09922   | 0.7847   | 0.4329  | 0.9755 | 0.2652  | 0.3187  | 1.292    | 0.2557  | 0.7713 | 0.4926 | 1.208  | 0.9825 |
| rs4648110  | NFKB1  | intron        | 103891022 | -0.0357   | 0.03616 | -0.107   | 0.03565   | -0.9806  | 0.3271  | 0.961  | 0.2164  | 0.2398  | 0.2935   | 0.588   | 0.8757 | 0.5417 | 1.416  | 0.9936 |
| rs4648133  | NFKB1  | intron        | 103893614 | 0.07311   | 0.04995 | -0.0248  | 0.171     | 1.463    | 0.1438  | 0.9063 | 0.1119  | 0.1345  | 0.4387   | 0.5078  | 0.8111 | 0.4362 | 1.508  | 0.9825 |
| rs4648141  | NFKB1  | intron        | 103894102 | -0.0428   | 0.03319 | -0.1078  | 0.02225   | -1.29    | 0.1976  | 0.9444 | 0.3636  | 0.4298  | 0.758    | 1.123   | 1.893  | 0.5009 | 1.147  | 0.9825 |
| rs3804099  | TLR2   | coding        | 154982261 | -0.01429  | 0.034   | -0.08093 | 0.05235   | -0.4202  | 0.6745  | 0.9755 | 0.3881  | 0.3626  | 0.2684   | 0.6044  | 1.115  | 0.7388 | 1.682  | 0.9936 |
| rs3804100  | TLR2   | coding        | 154983014 | 0.06235   | 0.06737 | -0.0697  | 0.1944    | 0.9255   | 0.355   | 0.961  | 0.0597  | 0.07602 | 0.3867   | 0.534   | 0.7717 | 0.3402 | 1.75   | 0.9825 |

|            |       |               |   |           |           |         |          |           |          |          |        |         |         |          |          |        |        |        |        |
|------------|-------|---------------|---|-----------|-----------|---------|----------|-----------|----------|----------|--------|---------|---------|----------|----------|--------|--------|--------|--------|
| rs5743303  | TLR3  | flanking_5UTR | 4 | 187364002 | 0.1034    | 0.04643 | -0.07203 | 0.1944    | 2.226    | 0.02634  | 0.8922 | 0.1269  | 0.1433  | 0.2171   | 0.6413   | 0.8688 | 0.4807 | 1.57   | 0.9936 |
| rs7365542  | TLR3  | 5UTR          | 4 | 187365542 | 0.05926   | 0.07004 | -0.01835 | 0.1965    | 0.846    | 0.3978   | 0.961  | 0.04478 | 0.07059 | 1.08     | 0.2987   | 0.6172 | 0.2465 | 1.545  | 0.9825 |
| rs3775296  | TLR3  | UTR           | 4 | 187372916 | 0.05999   | 0.04747 | -0.03305 | 0.153     | 1.264    | 0.2067   | 0.9444 | 0.1642  | 0.155   | 0.0615   | 0.8041   | 1.071  | 0.6224 | 1.843  | 0.9936 |
| rs1879026  | TLR3  | intron        | 4 | 187375470 | -0.08209  | 0.0601  | -0.1999  | 0.03571   | -1.366   | 0.1724   | 0.9335 | 0.1119  | 0.0848  | 0.8456   | 0.3578   | 1.36   | 0.7045 | 2.627  | 0.9825 |
| rs5743315  | TLR3  | intron        | 4 | 187375665 | 0.1007    | 0.05616 | -0.09384 | 0.2107    | 1.793    | 0.07342  | 0.8922 | 0.1045  | 0.08772 | 0.3223   | 0.5702   | 1.213  | 0.6219 | 2.367  | 0.9825 |
| rs3775291  | TLR3  | coding        | 4 | 187379223 | 0.03092   | 0.05534 | -0.07755 | 0.1394    | 0.5588   | 0.5765   | 0.9755 | 0.1045  | 0.117   | 0.1491   | 0.6994   | 0.8808 | 0.4625 | 1.678  | 0.9825 |
| rs4975618  | TERT  | flanking_3UTR | 5 | 1305463   | 0.00917   | 0.04427 | -0.07776 | 0.09594   | 0.2071   | 0.836    | 0.9856 | 0.1343  | 0.1491  | 0.17     | 0.6801   | 0.8854 | 0.4963 | 1.58   | 0.9936 |
| rs2853690  | TERT  | 3UTR          | 5 | 1306744   | 0.01321   | 0.03586 | -0.05707 | 0.0835    | 0.3685   | 0.7126   | 0.9755 | 0.303   | 0.2781  | 0.2893   | 0.5907   | 1.129  | 0.7262 | 1.754  | 0.9936 |
| rs2736122  | TERT  | intron        | 5 | 1310621   | 0.02961   | 0.03912 | -0.04706 | 0.1063    | 0.7569   | 0.4494   | 0.9755 | 0.2537  | 0.2193  | 0.6465   | 0.4214   | 1.21   | 0.7597 | 1.929  | 0.9825 |
| rs11133715 | TERT  | intron        | 5 | 1314052   | 0.01978   | 0.03937 | -0.05738 | 0.09694   | 0.5025   | 0.6155   | 0.9755 | 0.194   | 0.2193  | 0.3677   | 0.5442   | 0.857  | 0.5204 | 1.411  | 0.9825 |
| rs2736114  | TERT  | intron        | 5 | 1318204   | 0.03045   | 0.03293 | -0.0341  | 0.095     | 0.9246   | 0.3555   | 0.961  | 0.5455  | 0.4734  | 1.973    | 0.1601   | 1.335  | 0.8916 | 1.999  | 0.9825 |
| rs2075786  | TERT  | intron        | 5 | 1319310   | 0.06765   | 0.03294 | 0.003099 | 0.1322    | 2.054    | 0.04034  | 0.8922 | 0.4478  | 0.4094  | 0.5829   | 0.4452   | 1.17   | 0.7819 | 1.75   | 0.9825 |
| rs7726159  | TERT  | intron        | 5 | 1335319   | 0.02746   | 0.03966 | -0.05027 | 0.1052    | 0.6924   | 0.4889   | 0.9755 | 0.2164  | 0.2047  | 0.08055  | 0.7766   | 1.073  | 0.6588 | 1.748  | 0.9825 |
| rs2853677  | TERT  | intron        | 5 | 1340194   | -0.01269  | 0.03518 | -0.08164 | 0.05625   | -0.3608  | 0.7183   | 0.9755 | 0.3134  | 0.2485  | 2.073    | 0.15     | 1.38   | 0.8892 | 2.143  | 0.9825 |
| rs2853676  | TERT  | intron        | 5 | 1341547   | 0.06624   | 0.04395 | -0.01991 | 0.1524    | 1.507    | 0.1323   | 0.8922 | 0.2164  | 0.2105  | 0.01999  | 0.8876   | 1.036  | 0.6368 | 1.685  | 0.9936 |
| rs1900173  | IL6ST | intron        | 5 | 55275763  | 0.0606    | 0.03345 | -0.04975 | 0.1262    | 1.811    | 0.07052  | 0.8922 | 0.3433  | 0.4415  | 3.83     | 0.05034  | 0.6612 | 0.4364 | 1.002  | 0.9825 |
| rs11574779 | IL6ST | intron        | 5 | 55279876  | 0.01721   | 0.05264 | -0.08597 | 0.1204    | 0.3289   | 0.7439   | 0.9755 | 0.08955 | 0.1316  | 1.613    | 0.204    | 0.6492 | 0.3319 | 1.27   | 0.9825 |
| rs7719246  | IL6ST | intron        | 5 | 55280534  | 0.06885   | 0.0321  | 0.005944 | 0.1318    | 2.145    | 0.03228  | 0.8922 | 0.4328  | 0.5292  | 3.579    | 0.05851  | 0.6788 | 0.454  | 1.015  | 0.9825 |
| rs6860698  | IL6ST | intron        | 5 | 55286209  | -0.05136  | 0.04617 | -0.1418  | 0.03913   | -1.112   | 0.2664   | 0.9582 | 0.1791  | 0.1257  | 2.268    | 0.1321   | 1.517  | 0.8796 | 2.617  | 0.9825 |
| rs3730293  | IL6ST | coding        | 5 | 55286484  | -0.02515  | 0.03866 | -0.1009  | 0.05062   | -0.6505  | 0.5156   | 0.9755 | 0.2687  | 0.2573  | 0.06435  | 0.7998   | 1.06   | 0.6744 | 1.667  | 0.9936 |
| rs3729961  | IL6ST | UTR           | 5 | 55287688  | 0.03497   | 0.03556 | -0.03473 | 0.1047    | 0.9834   | 0.3257   | 0.961  | 0.2612  | 0.3216  | 1.661    | 0.1975   | 0.7456 | 0.4767 | 1.166  | 0.9825 |
| rs3730292  | IL6ST | coding        | 5 | 55295078  | -0.05384  | 0.0527  | -0.1571  | 0.04945   | -1.022   | 0.3073   | 0.961  | 0.1343  | 0.09064 | 1.99     | 0.1584   | 1.557  | 0.8385 | 2.89   | 0.9825 |
| rs10940495 | IL6ST | intron        | 5 | 55298417  | 0.009353  | 0.05397 | -0.09643 | 0.1151    | 0.1733   | 0.8625   | 0.9932 | 0.1493  | 0.114   | 1.1      | 0.2943   | 1.363  | 0.7628 | 2.436  | 0.9825 |
| rs3729959  | IL6ST | intron        | 5 | 55301046  | 0.1257    | 0.05906 | 0.009984 | 0.2415    | 1.833    | 0.06725  | 0.8922 | 0.08209 | 0.07895 | 0.01294  | 0.9094   | 1.043  | 0.5021 | 2.168  | 0.9936 |
| rs11741953 | IL6ST | 3UTR          | 5 | 55303571  | -0.009142 | 0.04774 | -0.06071 | 0.1811    | 1.833    | 0.06725  | 0.8922 | 0.08209 | 0.1864  | 7.896    | 0.004954 | 0.3904 | 0.1988 | 0.7666 | 0.9825 |
| rs2069685  | F2RL2 | intron        | 5 | 75949061  | 0.0875    | 0.03286 | -0.07355 | 0.05526   | -0.2782  | 0.7809   | 0.9761 | 0.4254  | 0.4064  | 0.1426   | 0.7057   | 1.081  | 0.1426 | 1.621  | 0.9936 |
| rs2069681  | F2RL2 | intron        | 5 | 75950508  | 0.04877   | 0.03696 | -0.04327 | 0.1408    | 1.039    | 0.2994   | 0.961  | 0.1119  | 0.1696  | 2.464    | 0.1165   | 0.6172 | 0.3365 | 1.132  | 0.9825 |
| rs2069680  | F2RL2 | intron        | 5 | 75950612  | -0.02898  | 0.04158 | -0.1105  | 0.05251   | -0.6971  | 0.486    | 0.9755 | 0.1061  | 0.1754  | 3.48     | 0.06213  | 0.5576 | 0.2999 | 1.037  | 0.9825 |
| rs2069679  | F2RL2 | intron        | 5 | 75950798  | -0.02363  | 0.06441 | -0.1499  | 0.1026    | -0.3668  | 0.7139   | 0.9755 | 0.08955 | 0.07602 | 0.2399   | 1.195    | 0.5847 | 2.444  | 0.9936 |        |
| rs2069658  | F2RL2 | intron        | 5 | 75953058  | 0.05067   | 0.03386 | -0.0157  | 0.117     | 1.496    | 0.135    | 0.8922 | 0.3881  | 0.4123  | 0.2343   | 0.6284   | 0.904  | 0.6007 | 1.36   | 0.9936 |
| rs2069657  | F2RL2 | intron        | 5 | 75953124  | 0.0558    | 0.06417 | -0.06996 | 0.1816    | 0.8696   | 0.3848   | 0.961  | 0.0597  | 0.09064 | 1.225    | 0.2683   | 0.637  | 0.285  | 1.424  | 0.9825 |
| rs24592    | F2RL2 | intron        | 5 | 75954494  | -0.05827  | 0.05568 | -0.1674  | 0.05086   | -1.047   | 0.2957   | 0.961  | 0.08209 | 0.09649 | 0.238    | 0.6256   | 0.8374 | 0.4102 | 1.709  | 0.9825 |
| rs2227746  | F2R   | flanking_5UTR | 5 | 75955389  | 0.02084   | 0.03929 | -0.05618 | 0.09785   | 0.5302   | 0.5066   | 0.9755 | 0.2463  | 0.2164  | 0.4937   | 0.4823   | 1.183  | 0.7397 | 1.893  | 0.9825 |
| rs2069646  | F2R   | intron        | 5 | 76046105  | -0.01504  | 0.03732 | -0.08818 | 0.0581    | -0.403   | 0.687    | 0.9755 | 0.2985  | 0.2924  | 0.01731  | 0.8953   | 1.03   | 0.665  | 1.595  | 0.9936 |
| rs2227744  | F2R   | intron        | 5 | 76048111  | -0.01719  | 0.05389 | -0.1228  | 0.08843   | -0.319   | 0.7499   | 0.9761 | 0.08955 | 0.1053  | 0.2621   | 0.6087   | 0.8361 | 0.4209 | 1.661  | 0.9936 |
| rs2227750  | F2R   | intron        | 5 | 76049220  | 0.02157   | 0.03247 | -0.04206 | 0.08521   | 0.6645   | 0.5066   | 0.9755 | 0.4552  | 0.4678  | 0.06157  | 0.804    | 0.9505 | 0.6366 | 1.419  | 0.9936 |
| rs253061   | F2R   | intron        | 5 | 76049756  | 0.009747  | 0.03773 | -0.0642  | 0.08369   | 0.2583   | 0.7962   | 0.9761 | 0.2612  | 0.2427  | 0.1768   | 0.6741   | 1.103  | 0.6979 | 1.744  | 0.9936 |
| rs2227752  | F2R   | intron        | 5 | 76049846  | -0.00452  | 0.05757 | -0.1173  | 0.1083    | -0.07852 | 0.9374   | 0.9932 | 0.05224 | 0.0848  | 1.46     | 0.227    | 0.5949 | 0.2541 | 1.393  | 0.9825 |
| rs37248    | F2R   | intron        | 5 | 76052702  | 0.04941   | 0.03394 | -0.01711 | 0.1159    | 1.456    | 0.1459   | 0.9063 | 0.3955  | 0.3363  | 1.481    | 0.2237   | 0.8549 | 1.951  | 0.9825 |        |
| rs153311   | F2R   | intron        | 5 | 76063579  | -0.02806  | 0.05723 | -0.1402  | 0.0841    | -0.4904  | 0.624    | 0.9755 | 0.1119  | 0.09064 | 5.002    | 0.4794   | 1.265  | 0.6591 | 2.426  | 0.9825 |
| rs2227800  | F2R   | 3UTR          | 5 | 76065128  | 0.03072   | 0.04775 | -0.06287 | 0.1243    | 0.6433   | 0.5202   | 0.9755 | 0.1716  | 0.1243  | 1.814    | 0.178    | 1.46   | 0.8398 | 2.539  | 0.9825 |
| rs227801   | F2R   | 3UTR          | 5 | 76066450  | 0.01925   | 0.06944 | -0.1168  | 0.1554    | 0.2772   | 0.7817   | 0.9761 | 0.05224 | 0.7602  | 0.8441   | 0.3582   | 0.6699 | 0.2836 | 1.582  | 0.9825 |
| rs250738   | F2R   | flanking_3UTR | 5 | 76068768  | 0.02159   | 0.05146 | -0.07927 | 0.1225    | 0.4196   | 0.6749   | 0.9755 | 0.08955 | 0.1082  | 0.362    | 0.5474   | 0.8108 | 0.4091 | 1.607  | 0.9825 |
| rs2227810  | F2R   | flanking_3UTR | 5 | 76068833  | -0.03627  | 0.06016 | -0.1542  | 0.08164   | -0.6029  | 0.5468   | 0.9755 | 0.07463 | 0.0731  | 0.003297 | 0.9542   | 1.023  | 0.4772 | 2.191  | 0.9978 |
| rs2242995  | F2RL1 | intron        | 5 | 76151421  | -0.03011  | 0.03994 | -0.1084  | 0.04817   | -0.754   | 0.4511   | 0.9755 | 0.2313  | 0.2147  | 0.1553   | 0.6935   | 1.101  | 0.6827 | 1.775  | 0.9936 |
| rs2243004  | F2RL1 | intron        | 5 | 76152873  | 0.02532   | 0.0755  | -0.1227  | 0.1733    | 0.3354   | 0.7374   | 0.9755 | 0.08209 | 0.05848 | 0.8815   | 0.3478   | 1.44   | 0.6703 | 3.093  | 0.9825 |
| rs2243010  | F2RL1 | intron        | 5 | 76153524  | 0.09332   | 0.06695 | -0.03789 | 0.2245    | 1.394    | 0.1638   | 0.9323 | 0.04478 | 0.04386 | 0.001918 | 0.9651   | 1.022  | 0.3879 | 2.692  | 0.9936 |
| rs2243051  | F2RL1 | intron        | 5 | 76161558  | -0.002417 | 0.03304 | -0.06718 | 0.06234   | -0.07314 | 0.9417   | 0.9932 | 0.4478  | 0.424   | 0.2221   | 0.6374   | 1.102  | 0.7366 | 1.647  | 0.9936 |
| rs2243056  | F2RL1 | intron        | 5 | 76162533  | 0.06674   | 0.07274 | -0.08583 | 0.1993    | 0.78     | 0.4356   | 0.9755 | 0.06716 | 0.05556 | 0.2343   | 0.6283   | 1.224  | 0.5393 | 2.778  | 0.9936 |
| rs2243066  | F2RL1 | 3UTR          | 5 | 76165869  | -0.02702  | 0.03827 | -0.102   | 0.04799   | -0.7059  | 0.4805   | 0.9323 | 0.2313  | 0.2398  | 0.03773  | 0.846    | 0.9543 | 0.5952 | 1.53   | 0.9936 |
| rs2243206  | IL13  | flanking_3UTR | 5 | 132028964 | 0.03908   | 0.04684 | -0.05271 | 0.1309    | 0.8345   | 0.4043   | 0.9668 | 0.1493  | 0.1257  | 0.4639   | 0.9458   | 1.22   | 0.688  | 2.163  | 0.9825 |
| rs2243208  | IL13  | flanking_3UTR | 5 | 132029050 | 0.02129   | 0.04496 | -0.06684 | 0.1094    | 0.4735   | 0.636    | 0.9755 | 0.1194  | 0.1287  | 0.07481  | 0.7845   | 0.9183 | 0.4987 | 1.691  | 0.9936 |
| rs2243218  | IL13  | flanking_3UTR | 5 | 132029923 | 0.05904   | 0.03495 | -0.00946 | 0.1275    | 1.689    | 0.09161  | 0.8922 | 0.2885  | 0.3012  | 0.003247 | 0.9546   | 0.9874 | 0.6383 | 1.527  | 0.9825 |
| rs2243219  | IL13  | flanking_3UTR | 5 | 132030024 | -0.0732   | 0.03382 | -0.1395  | -0.006926 | -2.165   | 0.03074  | 0.8922 | 0.4951  | 0.5175  | 0.4061   | 0.5239   | 0.8782 | 0.5888 | 1.31   | 0.9825 |
| rs2243235  | IL4   | flanking_5UTR | 5 | 132034657 | -0.197    | 0.07185 | -0.3378  | -0.05613  | -2.741   | 0.006276 | 0.8922 | 0.04478 | 0.05848 | 0.3501   | 0.554    | 0.7547 | 0.2963 | 1.922  | 0.9825 |
| rs2243246  | IL4   | flanking_5UTR | 5 | 132036307 | 0.01609   | 0.04558 | -0.07324 | 0.1054    | 0.3531   | 0.7241   | 0.9755 | 0.1716  | 0.1458  | 0.4919   | 0.7061   | 1.214  | 0.7061 | 2.086  | 0.9825 |
| rs2243247  | IL4   | flanking_5UTR | 5 | 132036505 | -0.009579 | 0.04219 | -0.09226 | 0.07311   | -0.2269  | 0.8206   | 0.9844 | 0.194   | 0.1784  | 0.1582   | 0.6908   |        |        |        |        |

|            |         |               |   |            |           |         |          |          |          |         |        |         |         |          |         |        |        |        |        |
|------------|---------|---------------|---|------------|-----------|---------|----------|----------|----------|---------|--------|---------|---------|----------|---------|--------|--------|--------|--------|
| rs2243251  | IL4     | coding        | 5 | 1320376866 | -0.05367  | 0.0483  | -0.1483  | 0.041    | -1.111   | 0.2689  | 0.9582 | 0.1866  | 0.1462  | 1.182    | 0.277   | 1.339  | 0.7899 | 2.261  | 0.9825 |
| rs2243252  | IL4     | intron        | 5 | 132038660  | -0.08926  | 0.05236 | -0.1919  | 0.01337  | -1.705   | 0.0687  | 0.8922 | 0.1343  | 0.1111  | 0.4999   | 0.4795  | 1.241  | 0.6811 | 2.276  | 0.9825 |
| rs2227284  | IL4     | intron        | 5 | 132040624  | 0.05148   | 0.04245 | -0.03173 | 0.1347   | 1.213    | 0.2257  | 0.9444 | 0.1567  | 0.2018  | 0.1274   | 0.2591  | 0.7353 | 0.4305 | 1.256  | 0.9825 |
| rs2243263  | IL4     | intron        | 5 | 132041198  | 0.05289   | 0.04371 | -0.03278 | 0.1386   | 1.21     | 0.2267  | 0.9444 | 0.1642  | 0.1784  | 0.1345   | 0.7138  | 0.9049 | 0.5303 | 1.544  | 0.9936 |
| rs2243274  | IL4     | intron        | 5 | 132042731  | 0.04906   | 0.03359 | -0.01677 | 0.1149   | 1.461    | 0.1446  | 0.9063 | 0.3657  | 0.4415  | 2.274    | 0.1316  | 0.7292 | 0.4833 | 1.1    | 0.9825 |
| rs2243283  | IL4     | intron        | 5 | 132044492  | -0.04595  | 0.04591 | -0.1359  | 0.04403  | -0.1001  | 0.3172  | 0.961  | 0.1343  | 0.1316  | 0.006338 | 0.9365  | 1.024  | 0.5633 | 1.842  | 0.9978 |
| rs11743810 | EGR1    | intron        | 5 | 137830303  | -0.02903  | 0.03444 | -0.09653 | 0.03846  | -0.8431  | 0.3995  | 0.961  | 0.306   | 0.3216  | 0.1091   | 0.7412  | 0.9298 | 0.6037 | 1.432  | 0.9936 |
| rs11741807 | EGR1    | flanking_3UTR | 5 | 137833551  | -0.01102  | 0.0323  | -0.07351 | 0.05311  | -0.3158  | 0.7523  | 0.9761 | 0.4478  | 0.5205  | 2.036    | 0.1536  | 0.747  | 0.5002 | 1.116  | 0.9825 |
| rs6196     | NR3C1   | coding        | 5 | 142641683  | -0.01347  | 0.04177 | -0.09534 | 0.0684   | -0.3225  | 0.7472  | 0.9755 | 0.2687  | 0.1784  | 0.438    | 0.02784 | 1.692  | 1.056  | 2.712  | 0.9825 |
| rs10482682 | NR3C1   | intron        | 5 | 142659590  | -0.01428  | 0.04521 | -0.1059  | 0.07132  | -0.3822  | 0.7024  | 0.9755 | 0.1642  | 0.1579  | 0.02834  | 0.8663  | 1.048  | 0.6095 | 1.801  | 0.9936 |
| rs6188     | NR3C1   | intron        | 5 | 142660537  | -0.000547 | 0.03461 | -0.06838 | 0.06729  | -0.01581 | 0.9874  | 0.9966 | 0.3731  | 0.3275  | 0.8936   | 0.3445  | 1.222  | 0.8059 | 1.854  | 0.9825 |
| rs6871322  | NR3C1   | intron        | 5 | 142703530  | 0.09255   | 0.07162 | -0.04782 | 0.2329   | 1.292    | 0.1967  | 0.9444 | 0.08209 | 0.1082  | 0.7232   | 0.3951  | 0.7372 | 0.3643 | 1.492  | 0.9825 |
| rs6877893  | NR3C1   | intron        | 5 | 142707386  | -0.01332  | 0.03328 | -0.07854 | 0.0519   | -0.4003  | 0.6891  | 0.9755 | 0.5224  | 0.4415  | 0.1116   | 1.383   | 0.9269 | 2.065  | 0.9936 |        |
| rs6861962  | NR3C1   | intron        | 5 | 142730494  | -0.01955  | 0.05437 | -0.1261  | 0.139    | -0.07297 | 0.9874  | 0.932  | 0.209   | 0.1462  | 2.767    | 0.0962  | 1.543  | 0.9233 | 2.577  | 0.9825 |
| rs9324921  | NR3C1   | intron        | 5 | 142747933  | 0.007799  | 0.04231 | -0.07513 | 0.09073  | 0.1843   | 0.8538  | 0.9909 | 0.194   | 0.1784  | 0.1582   | 0.8908  | 1.109  | 0.666  | 1.847  | 0.9936 |
| rs10482616 | NR3C1   | intron        | 5 | 142761760  | -0.02775  | 0.04365 | -0.1133  | 0.05781  | -0.6356  | 0.5252  | 0.9755 | 0.1716  | 0.1608  | 0.08231  | 0.7742  | 1.081  | 0.6341 | 1.844  | 0.9936 |
| rs17513046 | RIPK1   | flanking_5UTR | 6 | 3020552    | -0.02745  | 0.03232 | -0.09079 | 0.0359   | -0.8491  | 0.3961  | 0.961  | 0.4925  | 0.4675  | 2.421    | 1.106   | 0.7409 | 1.65   | 0.9936 |        |
| rs17541741 | RIPK1   | flanking_5UTR | 6 | 3021335    | 0.04837   | 0.03169 | -0.01375 | 0.1105   | 1.526    | 0.1274  | 0.8922 | 0.2727  | 0.2895  | 0.1311   | 0.9205  | 0.5747 | 1.279  | 0.9825 |        |
| rs17541817 | RIPK1   | coding        | 6 | 3022140    | 0.04323   | 0.04158 | -0.03827 | 0.1247   | 1.04     | 0.2989  | 0.961  | 0.1642  | 0.1784  | 0.1345   | 0.7138  | 0.9049 | 0.5303 | 1.544  | 0.9936 |
| rs17513067 | RIPK1   | intron        | 6 | 3026578    | 0.00537   | 0.05001 | -0.09264 | 0.1034   | 0.1074   | 0.9145  | 0.932  | 0.1343  | 0.1228  | 0.116    | 0.7334  | 1.108  | 0.613  | 2.004  | 0.9936 |
| rs17548376 | RIPK1   | intron        | 6 | 3030478    | -0.05995  | 0.04512 | -0.1484  | 0.02849  | -1.329   | 0.1844  | 0.9444 | 0.1866  | 0.1637  | 0.3552   | 0.5512  | 1.171  | 0.696  | 1.971  | 0.9825 |
| rs17513360 | RIPK1   | intron        | 6 | 3032005    | 0.004232  | 0.03652 | -0.06734 | 0.0758   | 0.9078   | 0.9755  | 0.932  | 0.3106  | 0.2798  | 0.4393   | 0.5075  | 1.16   | 0.7478 | 1.799  | 0.9825 |
| rs17548549 | RIPK1   | intron        | 6 | 3032345    | 0.1103    | 0.06506 | -0.01721 | 0.2378   | 1.695    | 0.09043 | 0.8922 | 0.05224 | 0.05556 | 0.02051  | 0.8861  | 0.937  | 0.3846 | 2.283  | 0.9936 |
| rs17548587 | RIPK1   | intron        | 6 | 3033939    | -0.04101  | 0.03789 | -0.1153  | 0.03326  | -1.082   | 0.2795  | 0.9582 | 0.2727  | 0.2895  | 0.1311   | 0.9205  | 0.5747 | 1.279  | 0.9825 |        |
| rs17513222 | RIPK1   | intron        | 6 | 30407259   | 0.05038   | 0.04062 | -0.03706 | 0.1378   | 1.129    | 0.2592  | 0.968  | 0.1418  | 0.1813  | 1.064    | 0.3024  | 0.7461 | 1.304  | 0.9936 |        |
| rs17548587 | RIPK1   | intron        | 6 | 3050521    | 0.01928   | 0.03294 | -0.04527 | 0.08383  | 0.5854   | 0.5585  | 0.9755 | 0.4701  | 0.4766  | 0.01611  | 0.899   | 0.9744 | 0.6531 | 1.454  | 0.9936 |
| rs17548589 | RIPK1   | intron        | 6 | 3053039    | 0.04761   | 0.03551 | -0.02198 | 0.1172   | 1.804    | 0.1804  | 0.9444 | 0.291   | 0.3     | 0.03689  | 0.8477  | 0.9579 | 0.6175 | 1.486  | 0.9936 |
| rs17513527 | RIPK1   | intron        | 6 | 3054411    | -0.01064  | 0.04916 | -0.107   | 0.08571  | -0.2165  | 0.8286  | 0.9856 | 0.1343  | 0.1404  | 0.02924  | 0.8642  | 0.9504 | 0.5307 | 1.702  | 0.9936 |
| rs17548587 | RIPK1   | intron        | 6 | 3055342    | -0.02644  | 0.06076 | -0.1455  | 0.09264  | -0.4351  | 0.6636  | 0.9755 | 0.09701 | 0.09357 | 0.01337  | 0.908   | 1.041  | 0.5283 | 2.05   | 0.9936 |
| rs17513595 | RIPK1   | 3UTR          | 6 | 3060280    | -0.01309  | 0.06088 | -0.1324  | 0.1062   | -0.215   | 0.8298  | 0.9856 | 0.05224 | 0.0848  | 1.46     | 0.227   | 0.5949 | 0.2541 | 1.393  | 0.9825 |
| rs17513263 | RIPK1   | flanking_3UTR | 6 | 3060525    | -0.0235   | 0.03345 | -0.08906 | 0.04207  | -0.7024  | 0.4826  | 0.9755 | 0.447   | 0.4324  | 0.08259  | 0.7738  | 1.061  | 0.708  | 1.59   | 0.9936 |
| rs2282151  | NFKBIE  | 3UTR          | 6 | 44334173   | 0.0689    | 0.06082 | -0.05903 | 0.1881   | 1.133    | 0.2577  | 0.958  | 0.06716 | 0.0731  | 0.05113  | 0.8211  | 0.913  | 0.4145 | 2.011  | 0.9936 |
| rs730775   | NFKBIE  | intron        | 6 | 44340052   | -0.01838  | 0.04096 | -0.09865 | 0.06189  | -0.4488  | 0.6537  | 0.9755 | 0.1866  | 0.1784  | 0.04378  | 0.8343  | 1.057  | 0.6311 | 1.769  | 0.9936 |
| rs28362856 | NFKBIE  | flanking_5UTR | 6 | 44342517   | 0.01442   | 0.07119 | -0.1251  | 0.154    | 0.2025   | 0.8396  | 0.9856 | 0.04478 | 0.06725 | 0.8501   | 0.3565  | 0.6501 | 0.2587 | 1.634  | 0.9825 |
| rs5029930  | TNFAIP3 | intron        | 6 | 138232377  | 0.005364  | 0.03292 | -0.05916 | 0.06988  | 0.1629   | 0.8706  | 0.932  | 0.0597  | 0.117   | 3.481    | 0.06207 | 0.4794 | 0.2182 | 1.053  | 0.9825 |
| rs5029933  | TNFAIP3 | intron        | 6 | 138233755  | 0.0947    | 0.05805 | -0.01907 | 0.2085   | 1.631    | 0.1032  | 0.8922 | 0.4104  | 0.4298  | 0.148    | 0.7005  | 0.9235 | 0.6158 | 1.385  | 0.9936 |
| rs598493   | TNFAIP3 | intron        | 6 | 138237095  | 0.04243   | 0.03445 | -0.0251  | 0.11     | 1.231    | 0.2186  | 0.9444 | 0.3284  | 0.3596  | 0.4139   | 0.52    | 0.8705 | 0.5703 | 1.329  | 0.9825 |
| rs5029942  | TNFAIP3 | coding        | 6 | 138237759  | -0.03001  | 0.03506 | -0.09873 | 0.03871  | -0.8558  | 0.3924  | 0.961  | 0.3358  | 0.3     | 0.5765   | 0.4477  | 1.18   | 0.7698 | 1.808  | 0.9825 |
| rs610604   | TNFAIP3 | intron        | 6 | 138241110  | -0.05945  | 0.03406 | -0.1262  | 0.007302 | -1.746   | 0.08132 | 0.8922 | 0.3955  | 0.3655  | 0.3707   | 0.5426  | 1.136  | 0.7536 | 1.712  | 0.9825 |
| rs5029953  | TNFAIP3 | intron        | 6 | 138242453  | -0.01012  | 0.04877 | -0.1057  | 0.08546  | -0.2075  | 0.8357  | 0.9856 | 0.1567  | 0.1118  | 1.782    | 0.1819  | 1.477  | 0.831  | 2.625  | 0.9825 |
| rs10370    | SOD2    | intron        | 6 | 160071943  | 0.07321   | 0.04437 | -0.01376 | 0.1602   | 1.65     | 0.09942 | 0.8922 | 0.1567  | 0.1345  | 0.3928   | 0.5308  | 1.196  | 0.6832 | 2.093  | 0.9825 |
| rs5746136  | SOD2    | 3UTR          | 6 | 160073495  | -0.03904  | 0.04066 | -0.04236 | 0.117    | 0.9183   | 0.3587  | 0.961  | 0.2015  | 0.1959  | 0.01896  | 0.8905  | 1.036  | 0.6285 | 1.707  | 0.9936 |
| rs2758331  | SOD2    | intron        | 6 | 160075481  | -0.05994  | 0.03795 | -0.1343  | 0.01444  | -1.579   | 0.1147  | 0.8922 | 0.2537  | 0.2412  | 0.08197  | 0.7746  | 1.07   | 0.6742 | 1.697  | 0.9936 |
| rs2746114  | SOD2    | intron        | 6 | 160079132  | -0.0221   | 0.06509 | -0.1497  | 0.1055   | -0.3396  | 0.7343  | 0.9755 | 0.04478 | 0.03509 | 0.2484   | 0.6182  | 1.289  | 0.4737 | 3.508  | 0.9936 |
| rs2842959  | SOD2    | intron        | 6 | 160083080  | -0.01647  | 0.03369 | -0.0825  | 0.04956  | -0.489   | 0.625   | 0.9755 | 0.3507  | 0.348   | 0.003307 | 0.9541  | 1.012  | 0.666  | 1.539  | 0.9978 |
| rs5746104  | SOD2    | intron        | 6 | 160083266  | 0.0408    | 0.0673  | -0.0911  | 0.1727   | 0.6063   | 0.5445  | 0.9755 | 0.02985 | 0.05848 | 1.648    | 0.1992  | 0.4954 | 0.1661 | 1.477  | 0.9825 |
| rs5746088  | SOD2    | flanking_5UTR | 6 | 160085137  | 0.04605   | 0.05357 | -0.0884  | 0.151    | 0.8597   | 0.3902  | 0.961  | 0.06716 | 0.1147  | 2.387    | 0.1223  | 0.5557 | 0.2614 | 1.181  | 0.9825 |
| rs3093277  | FGL2    | intron        | 7 | 76471069   | 0.000168  | 0.04029 | -0.07881 | 0.07914  | 0.004168 | 0.9967  | 0.967  | 0.194   | 0.1912  | 0.005045 | 0.9434  | 1.019  | 0.6139 | 1.69   | 0.9978 |
| rs3093276  | FGL2    | intron        | 7 | 76471637   | 0.07206   | 0.06078 | -0.04707 | 0.1912   | 1.186    | 0.2362  | 0.9444 | 0.05224 | 0.1053  | 3.294    | 0.06953 | 0.4685 | 0.2031 | 1.081  | 0.9825 |
| rs2075761  | FGL2    | coding        | 7 | 76473604   | 0.009902  | 0.07048 | -0.1282  | 0.148    | 1.405    | 0.8883  | 0.9932 | 0.04478 | 0.04904 | 0.3528   | 0.851   | 1.098  | 0.413  | 2.92   | 0.9936 |
| rs3091259  | FGL2    | intron        | 7 | 76474417   | 0.005639  | 0.05958 | -0.1111  | 0.1224   | 0.09464  | 0.9246  | 0.932  | 0.1136  | 0.09064 | 0.5746   | 0.4484  | 1.286  | 0.6701 | 2.469  | 0.9825 |
| rs3093269  | FGL2    | flanking_5UTR | 7 | 76474520   | 0.0353    | 0.05739 | -0.07719 | 0.1478   | 0.615    | 0.5388  | 0.9755 | 0.08955 | 0.07941 | 0.1309   | 0.7175  | 1.14   | 0.5598 | 2.323  | 0.9936 |
| rs3091260  | FGL2    | flanking_5UTR | 7 | 76475046   | -0.05732  | 0.03467 | -0.1253  | 0.1063   | -1.653   | 0.09872 | 0.932  | 0.3182  | 0.2794  | 0.6938   | 0.4049  | 1.204  | 0.7781 | 1.862  | 0.9825 |
| rs3211805  | CD36    | intron        | 7 | 79920227   | -0.01202  | 0.06627 | -0.1419  | 0.1179   | -0.1815  | 0.8561  | 0.9909 | 0.08955 | 0.04386 | 3.757    | 0.05259 | 2.144  | 0.976  | 4.711  | 0.9825 |
| rs3211810  | CD36    | intron        | 7 | 79921668   | 0.04213   | 0.05477 | -0.06522 | 0.1495   | 0.7692   | 0.442   | 0.9755 | 0.1343  | 0.0848  | 2.654    | 0.1033  | 1.675  | 0.896  | 3.131  | 0.9825 |

|            |          |               |    |           |           |         |           |         |           |          |         |         |         |          |         |        |        |        |        |
|------------|----------|---------------|----|-----------|-----------|---------|-----------|---------|-----------|----------|---------|---------|---------|----------|---------|--------|--------|--------|--------|
| rs3211822  | CD36     | intron        | 7  | 799232771 | -0.001089 | 0.03503 | -0.06975  | 0.06757 | -0.03108  | 0.9752   | 0.9944  | 0.3134  | 0.3129  | 0.000144 | 0.9904  | 1.003  | 0.6518 | 1.542  | 0.9985 |
| rs9979066  | CD36     | intron        | 7  | 79924486  | -0.04961  | 0.0436  | -0.1351   | 0.03584 | -1.138    | 0.2556   | 0.958   | 0.1343  | 0.1725  | 1.035    | 0.8089  | 0.7443 | 0.4208 | 1.316  | 0.9825 |
| rs3211834  | CD36     | intron        | 7  | 79924768  | -0.0352   | 0.03748 | -0.1087   | 0.03827 | -0.939    | 0.348    | 0.961   | 0.2313  | 0.2515  | 0.6466   | 0.8959  | 0.56   | 1.433  | 0.9936 |        |
| rs3211849  | CD36     | intron        | 7  | 79927974  | 0.03477   | 0.03198 | -0.02791  | 0.09745 | 1.087     | 0.2773   | 0.9582  | 0.4552  | 0.4737  | 0.1318   | 0.7166  | 0.9285 | 0.6219 | 1.386  | 0.9936 |
| rs3211850  | CD36     | intron        | 7  | 79928067  | 0.06777   | 0.06731 | -0.06416  | 0.1997  | 1.007     | 0.3144   | 0.961   | 0.07463 | 0.04971 | 1.117    | 0.2905  | 1.542  | 0.6872 | 3.459  | 0.9825 |
| rs1054516  | CD36     | intron        | 7  | 79929593  | 0.03536   | 0.03312 | -0.02955  | 0.1003  | 1.068     | 0.286    | 0.961   | 0.2985  | 0.3655  | 1.908    | 0.1672  | 0.7387 | 0.4803 | 1.136  | 0.9825 |
| rs3211868  | CD36     | intron        | 7  | 79931673  | -0.002158 | 0.04023 | -0.08101  | 0.07669 | -0.05365  | 0.9572   | 0.9944  | 0.209   | 0.2222  | 0.09924  | 0.7527  | 0.9245 | 0.5674 | 1.507  | 0.9936 |
| rs1358337  | CD36     | intron        | 7  | 79933036  | 0.003047  | 0.03216 | -0.05999  | 0.06608 | 0.09475   | 0.9245   | 0.9932  | 0.4697  | 0.4708  | 0.000432 | 0.9834  | 0.9957 | 0.6659 | 1.489  | 0.9985 |
| rs3211831  | CD36     | intron        | 7  | 79933505  | -0.02921  | 0.03162 | -0.152    | 0.09363 | -0.466    | 0.6414   | 0.9755  | 0.05224 | 0.0848  | 1.46     | 0.227   | 0.9549 | 0.2541 | 1.393  | 0.9825 |
| rs3211885  | CD36     | intron        | 7  | 79934053  | -0.02196  | 0.03241 | -0.06547  | 0.04156 | -0.6776   | 0.4983   | 0.9755  | 0.3657  | 0.3918  | 0.278    | 0.598   | 0.8948 | 0.592  | 1.353  | 0.9936 |
| rs3211913  | CD36     | intron        | 7  | 79939255  | 0.002734  | 0.03473 | -0.06553  | 0.0708  | 0.07874   | 0.9373   | 0.9932  | 0.3358  | 0.3363  | 8.22E-05 | 0.9928  | 0.998  | 0.6539 | 1.523  | 0.9985 |
| rs3211917  | CD36     | intron        | 7  | 79939952  | 0.06103   | 0.07116 | -0.07845  | 0.2005  | 0.8576    | 0.3914   | 0.961   | 0.02985 | 0.05263 | 1.133    | 0.287   | 0.5638 | 0.1839 | 1.668  | 0.9825 |
| rs3211920  | CD36     | intron        | 7  | 79940719  | -0.03884  | 0.05814 | -0.1528   | 0.07511 | -0.6681   | 0.5043   | 0.9755  | 0.08955 | 0.0731  | 0.3635   | 0.5465  | 1.247  | 0.6075 | 2.561  | 0.9825 |
| rs2227631  | SERPINE1 | flanking_5UTR | 7  | 100362973 | 0.0192    | 0.03564 | -0.05066  | 0.08906 | 0.5387    | 0.5903   | 0.9755  | 0.2348  | 0.2661  | 0.4861   | 0.4857  | 0.8466 | 0.5299 | 1.352  | 0.9825 |
| rs2227657  | SERPINE1 | intron        | 7  | 100366894 | 0.02767   | 0.05127 | -0.07282  | 0.1282  | 0.5896    | 0.3397   | 0.9755  | 0.1269  | 0.09942 | 0.7584   | 0.3838  | 1.316  | 0.7081 | 2.447  | 0.9825 |
| rs2227667  | SERPINE1 | intron        | 7  | 100368184 | -0.03678  | 0.03849 | -0.1122   | 0.03867 | -0.9554   | 0.337    | 0.961   | 0.2164  | 0.2778  | 1.882    | 0.1701  | 0.2181 | 0.4468 | 1.154  | 0.9825 |
| rs2227692  | SERPINE1 | intron        | 7  | 100372679 | -0.03234  | 0.04548 | -0.1215   | 0.0568  | -0.7111   | 0.4772   | 0.9755  | 0.1194  | 0.1813  | 2.691    | 0.1009  | 0.6124 | 0.3394 | 1.105  | 0.9825 |
| rs2227693  | SERPINE1 | intron        | 7  | 100372759 | -0.001881 | 0.05239 | -0.1046   | 0.1008  | -0.03591  | 0.9714   | 0.9944  | 0.1418  | 0.09649 | 2.03     | 0.1542  | 1.547  | 0.8459 | 2.829  | 0.9825 |
| rs11178    | SERPINE1 | 3UTR          | 7  | 100374519 | -0.003729 | 0.03393 | -0.07023  | 0.06277 | -0.1099   | 0.9125   | 0.9932  | 0.4701  | 0.5351  | 1.626    | 0.2023  | 0.771  | 0.5166 | 1.15   | 0.9825 |
| rs2227705  | SERPINE1 | flanking_3UTR | 7  | 100376427 | 0.01519   | 0.04412 | -0.06556  | 0.09594 | 0.3687    | 0.7124   | 0.9755  | 0.25    | 0.2047  | 1.15     | 0.2835  | 1.295  | 0.8067 | 2.08   | 0.9825 |
| rs17875657 | IKKB     | intron        | 8  | 42248662  | 0.08758   | 0.04529 | -0.00119  | 0.1763  | 0.05355   | 0.8922   | 0.1343  | 0.1579  | 0.4165  | 0.5187   | 0.8276  | 0.4655 | 1.471  | 0.9825 |        |
| rs17875669 | IKKB     | intron        | 8  | 42259706  | 0.05797   | 0.06819 | -0.07567  | 0.1916  | 0.8502    | 0.3955   | 0.961   | 0.07463 | 0.06725 | 0.08117  | 0.7757  | 1.119  | 0.5175 | 2.418  | 0.9936 |
| rs17875681 | IKKB     | intron        | 8  | 42267296  | 0.05984   | 0.06071 | -0.05916  | 0.1788  | 0.9856    | 0.3247   | 0.961   | 0.09701 | 0.08772 | 0.1012   | 0.7504  | 1.117  | 0.5639 | 2.214  | 0.9936 |
| rs17875701 | IKKB     | intron        | 8  | 42282744  | -0.02804  | 0.0381  | -0.1027   | 0.04663 | -0.7361   | 0.4619   | 0.9755  | 0.2761  | 0.2485  | 0.3842   | 0.6353  | 1.153  | 0.7345 | 1.811  | 0.9825 |
| rs17875725 | IKKB     | intron        | 8  | 42305360  | 0.01163   | 0.03466 | -0.05629  | 0.07956 | 0.3357    | 0.7372   | 0.9755  | 0.3955  | 0.4415  | 0.8318   | 0.8277  | 0.5511 | 0.6398 | 1.243  | 0.9825 |
| rs17875733 | IKKB     | intron        | 8  | 42306869  | 0.05139   | 0.04133 | -0.02962  | 0.1324  | 1.243     | 0.2141   | 0.9444  | 0.2015  | 0.193   | 0.04435  | 0.1055  | 0.6398 | 1.74   | 0.9936 |        |
| rs3614     | CEBPD    | flanking_3UTR | 8  | 48811243  | -0.02478  | 0.03409 | -0.09159  | 0.04202 | -0.727    | 0.4674   | 0.9755  | 0.4851  | 0.4912  | 0.10459  | 0.9039  | 0.9757 | 0.6542 | 1.455  | 0.9936 |
| rs1927914  | TLR4     | intron        | 9  | 117544279 | -0.006316 | 0.03611 | -0.07709  | 0.06446 | -0.1749   | 0.8612   | 0.9932  | 0.2803  | 0.2836  | 0.005185 | 0.9426  | 0.9837 | 0.6293 | 1.538  | 0.9978 |
| rs1927912  | TLR4     | intron        | 9  | 117548980 | 0.2239    | 0.05706 | 0.112     | 0.3357  | 3.924     | 9.58E-05 | 0.06962 | 0.1269  | 0.09064 | 1.393    | 0.2379  | 1.458  | 0.7775 | 2.733  | 0.9825 |
| rs17875657 | IKKB     | intron        | 8  | 42248662  | 0.08758   | 0.04529 | -0.00119  | 0.1763  | 0.05355   | 0.8922   | 0.1343  | 0.1579  | 0.4165  | 0.5187   | 0.8276  | 0.4655 | 1.471  | 0.9825 |        |
| rs17875669 | IKKB     | intron        | 8  | 42259706  | 0.05797   | 0.06819 | -0.07567  | 0.1916  | 0.8502    | 0.3955   | 0.961   | 0.07463 | 0.06725 | 0.08117  | 0.7757  | 1.119  | 0.5175 | 2.418  | 0.9936 |
| rs17875681 | IKKB     | intron        | 8  | 42267296  | 0.05984   | 0.06071 | -0.05916  | 0.1788  | 0.9856    | 0.3247   | 0.961   | 0.09701 | 0.08772 | 0.1012   | 0.7504  | 1.117  | 0.5639 | 2.214  | 0.9936 |
| rs17875701 | IKKB     | intron        | 8  | 42282744  | -0.02804  | 0.0381  | -0.1027   | 0.04663 | -0.7361   | 0.4619   | 0.9755  | 0.2761  | 0.2485  | 0.3842   | 0.6353  | 1.153  | 0.7345 | 1.811  | 0.9825 |
| rs17875725 | IKKB     | intron        | 8  | 42305360  | 0.01163   | 0.03466 | -0.05629  | 0.07956 | 0.3357    | 0.7372   | 0.9755  | 0.3955  | 0.4415  | 0.8318   | 0.8277  | 0.5511 | 0.6398 | 1.243  | 0.9825 |
| rs17875733 | IKKB     | intron        | 8  | 42306869  | 0.05139   | 0.04133 | -0.02962  | 0.1324  | 1.243     | 0.2141   | 0.9444  | 0.2015  | 0.193   | 0.04435  | 0.1055  | 0.6398 | 1.74   | 0.9936 |        |
| rs1927914  | TLR4     | intron        | 9  | 117544279 | -0.006316 | 0.03611 | -0.07709  | 0.06446 | -0.1749   | 0.8612   | 0.9932  | 0.2803  | 0.2836  | 0.005185 | 0.9426  | 0.9837 | 0.6293 | 1.538  | 0.9978 |
| rs1927912  | TLR4     | intron        | 9  | 117548980 | 0.2239    | 0.05706 | 0.112     | 0.3357  | 3.924     | 9.58E-05 | 0.06962 | 0.1269  | 0.09064 | 1.393    | 0.2379  | 1.458  | 0.7775 | 2.733  | 0.9825 |
| rs7864330  | TLR4     | intron        | 9  | 117549104 | -0.04008  | 0.0474  | -0.133    | 0.05283 | -0.8455   | 0.3981   | 0.961   | 0.1493  | 0.1287  | 0.351    | 0.5535  | 1.188  | 0.6713 | 2.103  | 0.9825 |
| rs1927911  | TLR4     | intron        | 9  | 117549608 | -0.01938  | 0.03298 | -0.08401  | 0.04526 | -0.5877   | 0.5569   | 0.9755  | 0.4328  | 0.4298  | 0.003561 | 0.9524  | 1.012  | 0.6764 | 1.515  | 0.9978 |
| rs0307025  | TLR4     | intron        | 9  | 117553421 | -0.000396 | 0.04378 | -0.08425  | 0.08346 | -0.009253 | 0.9926   | 0.9966  | 0.1716  | 0.1754  | 0.009641 | 0.9218  | 0.9739 | 0.5741 | 1.652  | 0.9978 |
| rs0307028  | TLR4     | intron        | 9  | 117553836 | 0.05402   | 0.04299 | -0.1402   | 0.0322  | -1.228    | 0.2198   | 0.9444  | 0.1343  | 0.1287  | 0.1754   | 0.2758  | 0.7293 | 0.4127 | 1.829  | 0.9825 |
| rs0307010  | TLR4     | UTR           | 9  | 117554275 | 0.08072   | 0.04569 | -0.008836 | 0.1703  | 1.767     | 0.07773  | 0.8922  | 0.209   | 0.1433  | 3.063    | 0.8009  | 1.58   | 0.944  | 2.643  | 0.9825 |
| rs7869402  | TLR4     | 3UTR          | 9  | 117557586 | -0.01736  | 0.04067 | -0.09254  | 0.05779 | -0.4527   | 0.6509   | 0.9755  | 0.2239  | 0.2427  | 0.1862   | 0.6645  | 0.9001 | 0.5595 | 1.448  | 0.9936 |
| rs1927906  | TLR4     | intron        | 9  | 117559669 | -0.02101  | 0.03338 | -0.06644  | 0.04442 | -0.6294   | 0.5293   | 0.9755  | 0.4104  | 0.4211  | 0.04451  | 0.8329  | 0.9073 | 0.6381 | 1.436  | 0.9936 |
| rs17250127 | TRAF2    | intron        | 9  | 137066308 | -0.04751  | 0.04389 | -0.1335   | 0.03851 | -1.082    | 0.2794   | 0.9582  | 0.2015  | 0.1433  | 2.432    | 0.1189  | 1.509  | 0.8977 | 2.536  | 0.9825 |
| rs17250421 | TRAF2    | intron        | 9  | 137080183 | -0.05166  | 0.04067 | -0.1314   | 0.02805 | -1.27     | 0.2044   | 0.9444  | 0.2388  | 0.193   | 1.237    | 0.2661  | 1.312  | 0.8123 | 2.119  | 0.9825 |
| rs17244047 | TRAF2    | intron        | 9  | 137080516 | -0.08582  | 0.05107 | -0.1859   | 0.01429 | -1.68     | 0.08336  | 0.8922  | 0.1493  | 0.1053  | 1.795    | 0.1803  | 1.491  | 0.8288 | 2.683  | 0.9825 |
| rs17250602 | TRAF2    | intron        | 9  | 137092847 | -0.03677  | 0.03352 | -0.1025   | 0.02893 | -1.097    | 0.2731   | 0.9582  | 0.4403  | 0.3421  | 3.984    | 0.04595 | 1.513  | 1.006  | 2.274  | 0.9825 |
| rs17250687 | TRAF2    | 3UTR          | 9  | 137096258 | -0.02876  | 0.03343 | -0.09428  | 0.03676 | -0.8603   | 0.3899   | 0.961   | 0.5075  | 0.4853  | 0.189    | 0.6637  | 1.093  | 0.7326 | 1.63   | 0.9936 |
| rs17250715 | TRAF2    | flanking_3UTR | 9  | 137097515 | -0.02062  | 0.06657 | -0.1511   | 0.1099  | -0.3097   | 0.7569   | 0.9761  | 0.08955 | 0.07941 | 0.1309   | 0.7175  | 1.14   | 0.5598 | 2.323  | 0.9936 |
| rs17250736 | TRAF2    | flanking_3UTR | 9  | 137098379 | -0.05354  | 0.03456 | -0.1213   | 0.0142  | -1.549    | 0.1218   | 0.8922  | 0.3731  | 0.3655  | 0.02416  | 0.8765  | 1.033  | 0.6834 | 1.563  | 0.9936 |
| rs17882934 | CHUK     | intron        | 10 | 101944992 | -0.01869  | 0.03342 | -0.09419  | 0.0468  | -0.5594   | 0.5761   | 0.9755  | 0.5075  | 0.4825  | 0.2409   | 0.6235  | 1.105  | 0.7412 | 1.648  | 0.9936 |
| rs12098571 | CHUK     | intron        | 10 | 101945191 | 0.1288    | 0.06566 | 0.00011   | 0.2575  | 1.962     | 0.05019  | 0.8922  | 0.04478 | 0.07602 | 1.499    | 0.2208  | 0.5697 | 0.2291 | 1.417  | 0.9825 |
| rs17884244 | CHUK     | intron        | 10 | 101953289 | -0.000693 | 0.03386 | -0.06705  | 0.06566 | -0.02046  | 0.9837   | 0.996   | 0.3358  | 0.3509  | 0.09637  | 0.7562  | 0.9354 | 0.6135 | 1.426  | 0.9936 |
| rs11190424 | CHUK     | intron        | 10 | 101959640 | -0.01568  | 0.04633 | -0.1065   | 0.07514 | -0.3383   | 0.7352   | 0.9755  | 0.1642  | 0.1235  | 1.36     | 0.2436  | 1.394  | 0.7963 | 2.439  | 0.9825 |
| rs17883261 | CHUK     | intron        | 10 | 101965416 | -0.02302  | 0.04207 | -0.1055   | 0.05945 | -0.5471   | 0.5845   | 0.9755  | 0.209   | 0.1988  | 0.8045   | 1.064   | 0.6495 | 1.744  | 0.9936 |        |
| rs17885784 | CHUK     | intron        | 10 | 101966491 | 0.08216   | 0.05058 | -0.03696  | 0.1613  | 1.229     | 0.2194   | 0.9444  |         |         |          |         |        |        |        |        |



|             |          |               |    |           |           |         |          |          |          |          |        |         |         |          |         |        |        |        |        |
|-------------|----------|---------------|----|-----------|-----------|---------|----------|----------|----------|----------|--------|---------|---------|----------|---------|--------|--------|--------|--------|
| rs7933280   | SAA2     | flanking_5UTR | 11 | 18228505  | 0.04897   | 0.03361 | -0.01885 | 0.1168   | 1.415    | 0.1575   | 0.923  | 0.3206  | 0.3977  | 0.1175   | 0.7317  | 0.9307 | 0.6174 | 1.403  | 0.9936 |
| rs4638289   | SAA1     | flanking_5UTR | 11 | 18242350  | -0.0586   | 0.03494 | -0.1251  | 0.00793  | -1.726   | 0.08472  | 0.8922 | 0.3858  | 0.3684  | 0.7556   | 0.3847  | 0.8283 | 0.5414 | 1.267  | 0.9825 |
| rs5030486   | TRAF6    | flanking_3UTR | 11 | 36465722  | 0.02294   | 0.03672 | -0.04903 | 0.0949   | 0.6246   | 0.5324   | 0.9755 | 0.1642  | 0.2164  | 1.629    | 0.2018  | 0.7114 | 0.421  | 1.202  | 0.9825 |
| rs5030483   | TRAF6    | flanking_3UTR | 11 | 36466352  | -0.103    | 0.05502 | -0.2109  | 0.004811 | -1.873   | 0.06154  | 0.8922 | 0.0597  | 0.1082  | 2.644    | 0.1039  | 0.5234 | 0.2371 | 1.155  | 0.9825 |
| rs5030480   | TRAF6    | flanking_3UTR | 11 | 36466852  | -0.05655  | 0.06501 | -0.184   | 0.07086  | -0.87    | 0.3859   | 0.961  | 0.06716 | 0.06433 | 0.01272  | 0.9102  | 0.407  | 0.4693 | 2.337  | 0.9936 |
| rs331457    | TRAF6    | intron        | 11 | 36480188  | 0.03771   | 0.04116 | -0.04297 | 0.1184   | 0.9162   | 0.3569   | 0.961  | 0.1642  | 0.1754  | 0.0856   | 0.6798  | 0.9232 | 0.5405 | 1.577  | 0.9936 |
| rs5030437   | TRAF6    | intron        | 11 | 36481331  | -0.03101  | 0.0342  | -0.09803 | 0.03602  | -0.9068  | 0.3648   | 0.961  | 0.3507  | 0.3363  | 0.09003  | 0.7641  | 1.066  | 0.7008 | 1.623  | 0.9936 |
| rs540386    | TRAF6    | intron        | 11 | 36481869  | 0.004815  | 0.0388  | -0.07123 | 0.08086  | 0.124    | 0.9013   | 0.932  | 0.209   | 0.2164  | 0.03147  | 0.8592  | 0.9567 | 0.5663 | 1.561  | 0.9936 |
| rs5030420   | TRAF6    | intron        | 11 | 36484234  | 0.09427   | 0.06283 | -0.02887 | 0.2174   | 1.5      | 0.1339   | 0.932  | 0.0597  | 0.07018 | 0.1684   | 0.6815  | 0.8613 | 0.3682 | 1.922  | 0.9936 |
| rs4755453   | TRAF6    | intron        | 11 | 36487220  | 0.003288  | 0.03298 | -0.06135 | 0.06793  | 0.0997   | 0.9206   | 0.932  | 0.4851  | 0.4853  | 1.85E-05 | 0.9966  | 0.9991 | 0.6697 | 1.491  | 0.9985 |
| rs331449    | TRAF6    | flanking_5UTR | 11 | 36489146  | -0.05536  | 0.04673 | -0.147   | 0.03622  | -1.185   | 0.2365   | 0.9444 | 0.1343  | 0.1696  | 0.8922   | 0.3449  | 0.7598 | 0.4292 | 1.345  | 0.9825 |
| rs5030411   | TRAF6    | flanking_5UTR | 11 | 36490329  | -0.04017  | 0.0352  | -0.1155  | 0.09352  | -1.045   | 0.2965   | 0.961  | 0.2836  | 0.2164  | 2.417    | 0.12    | 1.434  | 0.9092 | 2.26   | 0.9825 |
| rs5030409   | TRAF6    | flanking_5UTR | 11 | 36490461  | 0.01151   | 0.05719 | -0.1006  | 0.1236   | 0.2013   | 0.8405   | 0.9856 | 0.05224 | 0.0848  | 1.46     | 0.227   | 0.5949 | 0.2541 | 1.393  | 0.9825 |
| rs2244625   | PLCB3    | coding        | 11 | 63782720  | -0.02495  | 0.03954 | -0.1024  | 0.05255  | -0.631   | 0.5282   | 0.9755 | 0.2133  | 0.2368  | 0.01618  | 0.8988  | 0.9698 | 0.6045 | 1.556  | 0.9936 |
| rs10896027  | RELA     | flanking_3UTR | 11 | 65177336  | -0.03041  | 0.05286 | -0.134   | 0.0732   | -0.5752  | 0.5653   | 0.9755 | 0.1418  | 0.09357 | 2.34     | 1.0261  | 1.601  | 0.8704 | 1.839  | 0.9825 |
| rs11227247  | RELA     | intron        | 11 | 65179429  | -0.01865  | 0.03755 | -0.09225 | 0.05496  | -0.4665  | 0.6197   | 0.9755 | 0.3209  | 0.3158  | 0.01159  | 0.9143  | 1.024  | 0.6671 | 1.571  | 0.9965 |
| rs115682898 | RELA     | intron        | 11 | 65182895  | 0.1241    | 0.07036 | -0.01383 | 0.262    | 1.763    | 0.07827  | 0.8922 | 0.04478 | 0.06725 | 0.8501   | 0.3565  | 0.6501 | 0.2587 | 1.634  | 0.9825 |
| rs11568297  | RELA     | intron        | 11 | 65183569  | -0.01036  | 0.05762 | -0.1233  | 0.1026   | -0.1799  | 0.8573   | 0.9009 | 0.09701 | 0.09357 | 0.01337  | 0.908   | 1.041  | 0.5283 | 2.05   | 0.9936 |
| rs683878    | MMP3     | flanking_3UTR | 11 | 102210868 | 0.006086  | 0.03348 | -0.05963 | 0.0717   | 0.1818   | 0.8558   | 0.9009 | 0.4179  | 0.3889  | 0.3387   | 0.5606  | 1.128  | 0.7515 | 1.694  | 0.9825 |
| rs3025071   | MMP3     | intron        | 11 | 102214803 | -0.04122  | 0.05379 | -0.1467  | 0.06421  | -0.7683  | 0.4438   | 0.9755 | 0.05224 | 0.07647 | 0.8713   | 0.3506  | 0.6657 | 0.2818 | 1.573  | 0.9825 |
| rs3025070   | MMP3     | intron        | 11 | 102214951 | 0.06949   | 0.07033 | -0.06835 | 0.2073   | 0.9881   | 0.3234   | 0.961  | 0.07463 | 0.0848  | 0.1323   | 0.716   | 0.8704 | 0.4119 | 1.839  | 0.9936 |
| rs3020919   | MMP3     | intron        | 11 | 102218256 | 0.03008   | 0.03685 | -0.04215 | 0.1023   | 0.8162   | 0.4147   | 0.9755 | 0.2015  | 0.2544  | 1.479    | 0.224   | 0.7396 | 0.4544 | 1.204  | 0.9825 |
| rs679620    | MMP3     | coding        | 11 | 102218830 | -0.05194  | 0.03361 | -0.1178  | 0.01394  | -1.545   | 0.1227   | 0.8922 | 0.3284  | 0.3216  | 0.01987  | 0.8879  | 1.031  | 0.6734 | 1.579  | 0.9936 |
| rs522616    | MMP3     | flanking_5UTR | 11 | 102220258 | 0.04181   | 0.04059 | -0.03774 | 0.1214   | 1.03     | 0.3033   | 0.961  | 0.2015  | 0.2018  | 4.10E-05 | 0.9984  | 0.9984 | 0.6068 | 1.643  | 0.9825 |
| rs3882891   | IL18     | intron        | 11 | 111519971 | -0.04101  | 0.03271 | -0.1051  | 0.02311  | -1.254   | 0.2104   | 0.9444 | 0.4851  | 0.4825  | 0.002643 | 0.959   | 1.011  | 0.6776 | 1.507  | 0.9978 |
| rs549908    | IL18     | coding        | 11 | 111526126 | 0.03357   | 0.04067 | -0.04613 | 0.1133   | 0.8255   | 0.4094   | 0.9755 | 0.2164  | 0.1725  | 1.231    | 0.2671  | 1.325  | 0.8053 | 2.179  | 0.9825 |
| rs744256    | IL18     | intron        | 11 | 111528058 | 0.03028   | 0.07033 | -0.1076  | 0.1681   | 0.4305   | 0.6669   | 0.9755 | 0.02985 | 0.06433 | 2.216    | 0.4476  | 1.129  | 0.7556 | 1.686  | 0.9825 |
| rs2043055   | IL18     | intron        | 11 | 111536834 | -0.03779  | 0.03306 | -0.1026  | 0.02699  | -1.143   | 0.2533   | 0.958  | 0.4627  | 0.4327  | 0.35     | 0.5541  | 1.129  | 0.7556 | 1.686  | 0.9825 |
| rs5744229   | IL18     | intron        | 11 | 111539787 | 0.08187   | 0.05831 | -0.03241 | 0.1962   | 1.404    | 0.1607   | 0.923  | 0.08209 | 0.11    | 0.3588   | 0.5491  | 0.8049 | 0.3952 | 1.639  | 0.9825 |
| rs1946519   | IL18     | flanking_5UTR | 11 | 111540717 | -0.00617  | 0.03397 | -0.07329 | 0.05987  | -0.1977  | 0.8434   | 0.9873 | 0.3582  | 0.3412  | 0.1232   | 0.7256  | 1.078  | 0.7094 | 1.638  | 0.9936 |
| rs8177352   | TIRAP    | intron        | 11 | 125659053 | -0.07426  | 0.05948 | -0.1908  | 0.04231  | -1.249   | 0.2122   | 0.9444 | 0.1194  | 0.08772 | 1.107    | 0.2927  | 1.41   | 0.7416 | 2.681  | 0.9825 |
| rs595022    | TIRAP    | intron        | 11 | 125662189 | 0.09018   | 0.05368 | -0.02033 | 0.2007   | 1.599    | 0.1102   | 0.8922 | 0.05224 | 0.1287  | 5.877    | 0.01534 | 0.3733 | 0.1637 | 0.8511 | 0.9825 |
| rs646005    | TIRAP    | intron        | 11 | 125664244 | -0.00908  | 0.03366 | -0.07507 | 0.05688  | -0.2703  | 0.787    | 0.9761 | 0.4851  | 0.5029  | 0.1227   | 0.7261  | 0.9311 | 0.6243 | 1.388  | 0.9936 |
| rs1893352   | TIRAP    | intron        | 11 | 125665897 | -0.1335   | 0.05476 | -0.2408  | -0.2614  | -2.437   | 0.01504  | 0.8922 | 0.1045  | 0.09649 | 0.06901  | 0.7928  | 1.092  | 0.5648 | 2.113  | 0.9936 |
| rs611953    | TIRAP    | intron        | 11 | 125668901 | 0.04609   | 0.03299 | -0.01857 | 0.1108   | 1.397    | 0.1628   | 0.923  | 0.4478  | 0.4064  | 0.6759   | 0.411   | 1.184  | 0.7913 | 2.993  | 0.9825 |
| rs625413    | TIRAP    | intron        | 11 | 125669559 | 0.01146   | 0.05886 | -0.1039  | 0.1268   | 0.1946   | 0.8457   | 0.9876 | 0.1119  | 0.07602 | 1.578    | 0.2091  | 1.532  | 0.7843 | 2.772  | 0.9825 |
| rs4937116   | TIRAP    | intron        | 11 | 125670642 | -0.07075  | 0.05363 | -0.1759  | 0.03436  | -1.319   | 0.1875   | 0.9444 | 0.1493  | 0.1111  | 1.309    | 0.2526  | 1.404  | 0.7837 | 2.513  | 0.9825 |
| rs4937117   | TIRAP    | intron        | 11 | 125670710 | 0.01805   | 0.07128 | -0.1217  | 0.1578   | 0.2533   | 0.8001   | 0.9761 | 0.08955 | 0.05556 | 1.828    | 0.1764  | 1.672  | 0.7882 | 3.547  | 0.9825 |
| rs1786704   | TIRAP    | intron        | 11 | 125670967 | 0.1007    | 0.05989 | -0.01672 | 0.218    | 1.681    | 0.08324  | 0.8922 | 0.05224 | 0.1111  | 3.898    | 0.04834 | 0.4409 | 0.1918 | 1.014  | 0.9825 |
| rs8177382   | TIRAP    | intron        | 11 | 125671678 | -0.001575 | 0.04632 | -0.09236 | 0.08921  | -0.03399 | 0.9729   | 0.9444 | 0.1716  | 0.1579  | 0.1342   | 0.7141  | 1.105  | 0.6473 | 1.887  | 0.9936 |
| rs4149645   | TNFRSF1A | intron        | 12 | 6309548   | -0.05607  | 0.06073 | -0.1751  | 0.06296  | -0.9233  | 0.3562   | 0.961  | 0.08209 | 0.114   | 1.045    | 0.3066  | 0.6948 | 0.3446 | 1.401  | 0.9825 |
| rs4149641   | TNFRSF1A | intron        | 12 | 6310946   | 0.01612   | 0.06412 | -0.1095  | 0.1418   | 0.2514   | 0.8015   | 0.9761 | 0.05224 | 0.0731  | 0.6681   | 0.4137  | 0.6989 | 0.2949 | 1.657  | 0.9825 |
| rs4149639   | TNFRSF1A | intron        | 12 | 6312262   | -0.01138  | 0.04631 | -0.1021  | 0.07937  | -0.2459  | 0.8059   | 0.9797 | 0.1343  | 0.155   | 0.3233   | 0.5697  | 0.8461 | 0.4754 | 1.506  | 0.9825 |
| rs4149637   | TNFRSF1A | coding        | 12 | 6313262   | -0.02132  | 0.06186 | -0.1426  | 0.09993  | -0.3447  | 0.7305   | 0.9755 | 0.291   | 0.2485  | 0.9005   | 0.3426  | 0.5944 | 0.2382 | 1.483  | 0.9825 |
| rs4149578   | TNFRSF1A | intron        | 12 | 6317698   | -0.01966  | 0.03786 | -0.09387 | 0.05455  | -0.5192  | 0.6038   | 0.9755 | 0.291   | 0.2485  | 0.9005   | 0.3426  | 0.5944 | 0.2382 | 1.483  | 0.9825 |
| rs4149576   | TNFRSF1A | intron        | 12 | 6319376   | -0.03296  | 0.04583 | -0.1228  | 0.05687  | -0.7191  | 0.4723   | 0.9755 | 0.1343  | 0.1404  | 0.02924  | 0.8642  | 0.9504 | 0.5307 | 1.702  | 0.9936 |
| rs4149575   | TNFRSF1A | intron        | 12 | 6319471   | 0.06003   | 0.06322 | -0.06388 | 0.1839   | 0.9495   | 0.3427   | 0.961  | 0.1194  | 0.0731  | 1.269    | 0.1054  | 1.719  | 0.8867 | 3.334  | 0.9936 |
| rs4149623   | TNFRSF1A | intron        | 12 | 6320839   | 0.02021   | 0.03422 | -0.03986 | 0.09429  | 0.7952   | 0.4268   | 0.9444 | 0.3881  | 0.4083  | 0.1632   | 0.6862  | 0.9191 | 0.6102 | 1.384  | 0.9936 |
| rs2234649   | TNFRSF1A | flanking_5UTR | 12 | 6321624   | -0.04193  | 0.05324 | -0.1463  | 0.06242  | -0.7875  | 0.4313   | 0.9755 | 0.1045  | 0.1065  | 0.00418  | 0.9484  | 0.9787 | 0.5096 | 1.88   | 0.9978 |
| rs4149570   | TNFRSF1A | flanking_5UTR | 12 | 6321851   | -0.08472  | 0.04931 | -0.1313  | 0.03192  | -1.313   | 0.1898   | 0.9444 | 0.1343  | 0.1287  | 0.02735  | 0.8686  | 1.051  | 0.5832 | 1.894  | 0.9936 |
| rs4251429   | IRAK4    | intron        | 12 | 42440674  | 0.01835   | 0.03652 | -0.05322 | 0.08992  | 0.5026   | 0.6154   | 0.9755 | 0.2239  | 0.2865  | 1.923    | 0.1655  | 0.7182 | 0.4493 | 1.148  | 0.9825 |
| rs4251460   | IRAK4    | intron        | 12 | 42449035  | -0.01291  | 0.03256 | -0.07672 | 0.05091  | -0.3964  | 0.6919   | 0.9755 | 0.4254  | 0.462   | 0.5212   | 0.4703  | 0.8621 | 0.5761 | 1.29   | 0.9825 |
| rs4251473   | IRAK4    | intron        | 12 | 42452585  | -0.133    | 0.04372 | -0.2187  | -0.04735 | -3.043   | 0.002427 | 0.5943 | 0.1642  | 0.155   | 0.0615   | 0.8041  | 1.071  | 0.6224 | 1.843  | 0.9936 |
| rs4251513   | IRAK4    | intron        | 12 | 42460471  | -0.05103  | 0.04703 | -0.1432  | 0.04114  | -1.085   | 0.2783   | 0.9582 | 0.1642  | 0.1941  | 0.5698   | 0.4503  | 0.8155 | 0.4799 | 1.386  | 0.9825 |
| rs4251520   | IRAK4    | intron        | 12 | 42461605  | 0.03172   | 0.04135 | -0.04933 | 0.1128   | 0.767    | 0.4433   | 0.9755 | 0.209   | 0.1988  | 0.0613   | 0.8045  | 1.064  | 0.6495 | 1.744  | 0.9936 |
| rs4251522   | IRAK4    | intron        | 12 | 42461807  | -0.02108  | 0.03991 | -0.05556 | 0.09771  | 0.5391   | 0.59     | 0.9755 | 0.1567  | 0.231   | 3.201    | 0.0736  | 0.6187 | 0.3644 | 1.05   | 0.9825 |
| rs4251535   | IRAK4    | intron        | 12 | 424654    |           |         |          |          |          |          |        |         |         |          |         |        |        |        |        |

|            |        |               |           |           |         |           |           |         |          |        |         |         |          |         |        |        |        |        |
|------------|--------|---------------|-----------|-----------|---------|-----------|-----------|---------|----------|--------|---------|---------|----------|---------|--------|--------|--------|--------|
| rs2694847  | SP1    | intron        | 52071295  | -0.03027  | 0.03464 | -0.09817  | 0.03763   | -0.8739 | 0.3825   | 0.961  | 0.3657  | 0.7365  | 0.04791  | 0.8267  | 0.9548 | 0.6309 | 1.445  | 0.9936 |
| rs2045472  | SP1    | intron        | 52078255  | 0.03064   | 0.03806 | -0.04396  | 0.1052    | 0.8051  | 0.421    | 0.9755 | 0.306   | 0.269   | 0.6534   | 0.4189  | 1.198  | 0.7728 | 1.857  | 0.9825 |
| rs10876450 | SP1    | flanking_3UTR | 52097301  | -0.0202   | 0.0412  | -0.1009   | 0.06054   | -0.4903 | 0.6241   | 0.9755 | 0.1866  | 0.1871  | 0.002004 | 0.9886  | 0.9663 | 0.5967 | 1.663  | 0.9985 |
| rs2069727  | IFNG   | flanking_3UTR | 66834490  | 0.02095   | 0.03849 | -0.05449  | 0.09638   | 0.5443  | 0.5864   | 0.9755 | 0.2388  | 0.2544  | 0.1246   | 0.7241  | 0.9195 | 0.5772 | 1.465  | 0.9936 |
| rs2069714  | IFNG   | intron        | 66837311  | 0.1398    | 0.06908 | 0.004458  | 0.2752    | 2.025   | 0.04329  | 0.8922 | 0.0597  | 0.05263 | 0.09319  | 0.7602  | 1.143  | 0.4846 | 2.695  | 0.9936 |
| rs1861493  | IFNG   | intron        | 66837463  | -0.0431   | 0.04997 | -0.141    | 0.05485   | -0.8624 | 0.3887   | 0.961  | 0.08955 | 0.1316  | 0.1613   | 0.204   | 0.6492 | 0.3319 | 1.27   | 0.9825 |
| rs1861494  | IFNG   | intron        | 66837676  | -0.0615   | 0.04393 | -0.1476   | 0.0246    | -1.4    | 0.162    | 0.923  | 0.1343  | 0.1579  | 0.4165   | 0.5187  | 0.8276 | 0.4655 | 1.471  | 0.9825 |
| rs2228315  | SELP1G | coding        | 107520364 | 0.03625   | 0.037   | -0.03627  | 0.1088    | 0.9797  | 0.3276   | 0.961  | 0.2985  | 0.2719  | 0.3378   | 0.5611  | 1.139  | 0.7337 | 1.769  | 0.9825 |
| rs179137   | SELP1G | intron        | 107522157 | -0.05797  | 0.03972 | -0.1358   | 0.01987   | -1.46   | 0.1448   | 0.9063 | 0.1567  | 0.2544  | 5.236    | 0.02213 | 0.5447 | 0.3221 | 0.9213 | 0.9825 |
| rs179131   | SELP1G | intron        | 107523558 | -0.1321   | 0.05544 | -0.2407   | -0.2342   | -2.362  | 0.01746  | 0.8922 | 0.08955 | 0.1272  | 1.322    | 0.2502  | 0.6748 | 0.344  | 1.324  | 0.9825 |
| rs179129   | SELP1G | intron        | 107524657 | -0.06863  | 0.0661  | -0.1982   | 0.06092   | -1.038  | 0.2935   | 0.961  | 0.0597  | 0.05848 | 0.002597 | 0.9594  | 1.022  | 0.4389 | 2.381  | 0.9978 |
| rs1736370  | SELP1G | intron        | 107524934 | -0.04895  | 0.04161 | -0.1294   | 0.03152   | -1.192  | 0.2336   | 0.9444 | 0.2015  | 0.1725  | 0.5461   | 0.4599  | 1.21   | 0.7291 | 2.009  | 0.9825 |
| rs4964269  | SELP1G | intron        | 107525266 | -0.00476  | 0.03769 | -0.07862  | 0.0691    | -0.1263 | 0.8995   | 0.932  | 0.2836  | 0.2895  | 0.0163   | 0.8984  | 0.6242 | 0.6242 | 1.512  | 0.9936 |
| rs179121   | SELP1G | intron        | 107526582 | 0.007475  | 0.06443 | -0.1188   | 0.1338    | 0.116   | 0.9077   | 0.932  | 0.05224 | 0.06725 | 0.3674   | 0.5444  | 0.7645 | 0.3201 | 1.826  | 0.9825 |
| rs179115   | SELP1G | intron        | 107527898 | -0.03605  | 0.04218 | -0.1187   | 0.04663   | -0.8546 | 0.3931   | 0.961  | 0.1667  | 0.1959  | 0.5339   | 0.465   | 0.8209 | 0.4832 | 1.395  | 0.9825 |
| rs179107   | SELP1G | flanking_5UTR | 107530614 | -0.07728  | 0.04859 | -0.1725   | 0.01795   | -1.591  | 0.1122   | 0.8922 | 0.209   | 0.1404  | 3.377    | 0.0661  | 1.618  | 0.9655 | 2.711  | 0.9825 |
| rs179106   | SELP1G | flanking_5UTR | 107530807 | 0.08724   | 0.04542 | -0.001779 | 0.1763    | 1.921   | 0.05516  | 0.8922 | 0.2015  | 0.1735  | 0.5061   | 0.4768  | 1.202  | 0.7239 | 1.995  | 0.9825 |
| rs1169288  | TCF1   | coding        | 119879370 | 0.095     | 0.04936 | -0.001743 | 0.1917    | 1.925   | 0.05467  | 0.8922 | 0.1045  | 0.1462  | 1.44     | 0.2301  | 0.6813 | 0.363  | 1.279  | 0.9825 |
| rs1169286  | TCF1   | intron        | 119881776 | 0.09074   | 0.0373  | 0.01763   | 0.1639    | 2.432   | 0.01524  | 0.8922 | 0.2164  | 0.2794  | 1.975    | 0.16    | 0.7123 | 0.4432 | 1.145  | 0.9825 |
| rs1169293  | TCF1   | intron        | 119889285 | 0.06815   | 0.04359 | -0.01729  | 0.1536    | 1.583   | 0.1184   | 0.8922 | 0.1493  | 0.1754  | 0.4721   | 0.492   | 0.8246 | 0.4753 | 1.43   | 0.9825 |
| rs2071190  | TCF1   | intron        | 119893992 | -0.01505  | 0.03727 | -0.0881   | 0.058     | -0.4037 | 0.6866   | 0.9755 | 0.2537  | 0.2398  | 0.1019   | 0.7496  | 1.078  | 0.6795 | 1.71   | 0.9936 |
| rs1169303  | TCF1   | intron        | 119899096 | -0.01009  | 0.03461 | -0.07793  | 0.05775   | -0.2915 | 0.7707   | 0.9761 | 0.3284  | 0.3421  | 0.08129  | 0.7756  | 0.9402 | 0.6152 | 1.437  | 0.9936 |
| rs1169310  | TCF1   | 3UTR          | 119902153 | 0.06216   | 0.04444 | -0.02494  | 0.1492    | -1.399  | 0.1623   | 0.923  | 0.1343  | 0.2059  | 3.285    | 0.7756  | 0.9402 | 0.6152 | 1.437  | 0.9936 |
| rs17844129 | CPB2   | intron        | 45531053  | -0.007432 | 0.04523 | -0.09607  | 0.08121   | -0.1643 | 0.8695   | 0.932  | 0.1385  | 0.1637  | 0.4554   | 0.4998  | 0.8208 | 0.4622 | 1.458  | 0.9825 |
| rs17844115 | CPB2   | coding        | 45536827  | -0.1563   | 0.05142 | -0.2571   | -0.05554  | -3.04   | 0.002452 | 0.5943 | 0.1061  | 0.1257  | 0.3483   | 0.9551  | 0.825  | 0.6355 | 1.564  | 0.9825 |
| rs17844075 | CPB2   | intron        | 45543546  | -0.04906  | 0.03234 | -0.1124   | 0.10432   | -1.517  | 0.1297   | 0.8922 | 0.4697  | 0.4824  | 0.06103  | 0.8049  | 0.9505 | 0.4352 | 1.422  | 0.9936 |
| rs17844070 | CPB2   | intron        | 45546524  | 0.05177   | 0.03285 | -0.01261  | 0.1161    | 1.576   | 0.1155   | 0.8922 | 0.3788  | 0.3618  | 0.1187   | 0.7305  | 1.076  | 0.71   | 1.63   | 0.9936 |
| rs17844129 | CPB2   | intron        | 45563815  | -0.02278  | 0.03906 | -0.09934  | 0.05378   | -0.5833 | 0.5599   | 0.9755 | 0.2231  | 0.2281  | 0.0134   | 0.9079  | 0.9718 | 0.5989 | 1.577  | 0.9936 |
| rs17844179 | CPB2   | intron        | 45564278  | 0.007467  | 0.05957 | -0.1093   | 0.1242    | 0.1253  | 0.9003   | 0.932  | 0.07576 | 0.09649 | 0.4963   | 0.4811  | 0.7675 | 0.367  | 1.605  | 0.9825 |
| rs17844008 | CPB2   | intron        | 45566112  | -0.04041  | 0.03351 | -0.1061   | 0.02526   | -1.206  | 0.2282   | 0.9444 | 0.3788  | 0.348   | 0.3947   | 0.5298  | 1.143  | 0.7537 | 1.732  | 0.9825 |
| rs17844394 | CPB2   | intron        | 45568992  | 0.008372  | 0.03972 | -0.0941   | 0.1108    | 0.1601  | 0.8728   | 0.932  | 0.1343  | 0.09357 | 1.702    | 0.1921  | 1.503  | 0.8122 | 2.782  | 0.9825 |
| rs17843986 | CPB2   | intron        | 45571318  | -0.02129  | 0.03257 | -0.08512  | 0.04253   | -0.6539 | 0.5134   | 0.9755 | 0.4179  | 0.383   | 0.4908   | 0.4836  | 1.156  | 0.77   | 1.737  | 0.9825 |
| rs17844156 | CPB2   | intron        | 45574196  | -0.0614   | 0.03272 | -0.1255   | 0.002721  | -1.877  | 0.06096  | 0.8922 | 0.5     | 0.5     | 0        | 1       | 0.6692 | 1.494  | 1      | 0.9825 |
| rs17844156 | CPB2   | intron        | 45575874  | -0.05157  | 0.07112 | -0.191    | 0.08782   | -0.7251 | 0.4686   | 0.9755 | 0.0597  | 0.05848 | 0.002597 | 0.9594  | 1.022  | 0.4389 | 2.381  | 0.9978 |
| rs17843981 | CPB2   | intron        | 45577040  | -0.08031  | 0.04022 | -0.1591   | -0.001476 | -1.997  | 0.04624  | 0.8922 | 0.2121  | 0.193   | 0.2194   | 0.6395  | 1.126  | 0.6854 | 1.849  | 0.9936 |
| rs17844148 | CPB2   | flanking_5UTR | 45577313  | 0.07752   | 0.06837 | -0.05648  | 0.2115    | 1.134   | 0.2573   | 0.958  | 0.03731 | 0.06725 | 1.559    | 0.2119  | 0.5376 | 0.2001 | 1.445  | 0.9825 |
| rs1338055  | NFKBIA | flanking_3UTR | 34940205  | 0.03415   | 0.03675 | -0.03788  | 0.1062    | 0.9291  | 0.3531   | 0.961  | 0.306   | 0.2368  | 2.414    | 0.1203  | 1.421  | 0.9112 | 2.215  | 0.9825 |
| rs10782383 | NFKBIA | coding        | 34942677  | -0.1069   | 0.0715  | -0.2471   | 0.03321   | -1.496  | 0.1352   | 0.8922 | 0.06716 | 0.04971 | 0.5682   | 0.451   | 1.376  | 0.5979 | 3.169  | 0.9825 |
| rs1957106  | NFKBIA | coding        | 34943521  | 0.03609   | 0.0465  | -0.05505  | 0.1272    | 0.7761  | 0.4379   | 0.9755 | 0.1716  | 0.1725  | 0.000514 | 0.9819  | 0.9939 | 0.5853 | 1.688  | 0.9985 |
| rs2233409  | NFKBIA | flanking_5UTR | 34944021  | -0.04194  | 0.03415 | -0.1345   | 0.05058   | -0.8894 | 0.3746   | 0.961  | 0.1269  | 0.1257  | 0.001125 | 0.9732  | 1.01   | 0.554  | 1.842  | 0.9985 |
| rs1338053  | NFKBIA | flanking_5UTR | 34944605  | -0.01876  | 0.03803 | -0.09329  | 0.05577   | -0.4934 | 0.6219   | 0.9755 | 0.2537  | 0.2281  | 0.3523   | 0.5528  | 1.151  | 0.7236 | 1.83   | 0.9825 |
| rs936213   | PLCB2  | intron        | 38368637  | 0.04408   | 0.03445 | -0.02345  | 0.1116    | 1.279   | 0.2012   | 0.9444 | 0.2836  | 0.3099  | 0.317    | 0.5734  | 0.8813 | 0.5676 | 1.368  | 0.9825 |
| rs12439272 | PLCB2  | intron        | 38372096  | 0.01639   | 0.0472  | -0.08649  | 0.1193    | 0.3122  | 0.755    | 0.9761 | 0.06776 | 0.1053  | 1.633    | 0.2013  | 0.612  | 0.2864 | 1.308  | 0.9825 |
| rs2305650  | PLCB2  | intron        | 38376510  | -0.09674  | 0.03719 | -0.1696   | -0.02385  | -2.601  | 0.00948  | 0.8922 | 0.2388  | 0.2924  | 1.38     | 0.2401  | 0.7592 | 0.4791 | 1.203  | 0.9825 |
| rs1869901  | PLCB2  | intron        | 38382919  | 0.01756   | 0.03232 | -0.04579  | 0.08092   | 0.5434  | 0.587    | 0.9755 | 0.4701  | 0.4123  | 1.317    | 0.2512  | 1.265  | 0.8464 | 1.89   | 0.9825 |
| rs1123487  | PLCB2  | intron        | 38386233  | 0.002595  | 0.03691 | -0.06976  | 0.07495   | 0.0703  | 0.944    | 0.932  | 0.2612  | 0.2515  | 0.0481   | 0.8264  | 1.052  | 0.6668 | 1.661  | 0.9936 |
| rs13329318 | SELS   | flanking_3UTR | 99626996  | 0.001175  | 0.03361 | -0.06471  | 0.06706   | 0.03496 | 0.9721   | 0.9444 | 0.4179  | 0.3839  | 0.4635   | 0.496   | 1.152  | 0.7664 | 1.732  | 0.9825 |
| rs13329646 | SELS   | flanking_3UTR | 99627106  | 0.008412  | 0.03306 | -0.05639  | 0.07321   | 0.2544  | 0.7992   | 0.9761 | 0.4924  | 0.5     | 0.02179  | 0.8826  | 0.9701 | 0.6488 | 1.451  | 0.9936 |
| rs4965814  | SELS   | intron        | 99631440  | 0.01039   | 0.03648 | -0.06111  | 0.08189   | 0.2847  | 0.7093   | 0.9761 | 0.2836  | 0.2719  | 0.06553  | 0.798   | 1.06   | 0.6793 | 1.653  | 0.9936 |
| rs3024537  | IL4R   | intron        | 27260320  | 0.01879   | 0.05039 | -0.07996  | 0.1176    | 0.373   | 0.7093   | 0.9761 | 0.1119  | 0.1316  | 0.3371   | 0.5615  | 0.8319 | 0.4467 | 1.549  | 0.9825 |
| rs3024545  | IL4R   | intron        | 27261286  | 0.09772   | 0.06256 | -0.02489  | 0.2203    | 1.562   | 0.1187   | 0.8922 | 0.08955 | 0.04971 | 2.672    | 0.1022  | 1.88   | 0.8726 | 4.052  | 0.9825 |
| rs3024548  | IL4R   | intron        | 27262032  | -0.03235  | 0.05331 | -0.08853  | 0.04203   | -0.698  | 0.5403   | 0.9755 | 0.3507  | 0.3512  | 8.30E-05 | 0.9927  | 0.9881 | 0.656  | 1.518  | 0.9985 |
| rs3024576  | IL4R   | intron        | 27265691  | -0.03401  | 0.05552 | -0.1428   | 0.07481   | -0.6126 | 0.4803   | 0.9755 | 0.0597  | 0.09649 | 1.655    | 0.1982  | 0.5945 | 0.2672 | 1.323  | 0.9825 |
| rs2239349  | IL4R   | intron        | 27266389  | 0.007264  | 0.03516 | -0.06165  | 0.07617   | 0.2066  | 0.8364   | 0.9856 | 0.3358  | 0.3333  | 0.002665 | 0.9588  | 1.011  | 0.6616 | 1.546  | 0.9978 |
| rs2239345  | IL4R   | intron        | 27269294  | 0.02519   | 0.04177 | -0.05687  | 0.1071    | 0.6031  | 0.5467   | 0.9755 | 0.194   | 0.1901  | 0.00982  | 0.9211  | 1.026  | 0.6184 | 1.702  | 0.9978 |
| rs3024610  | IL4R   | intron        | 27271659  | 0.02532   | 0.04138 | -0.05769  | 0.1043    | 0.5606  | 0.5752   | 0.9755 | 0.2537  | 0.1988  | 1.724    | 0.1892  | 1.37   | 0.8553 | 2.194  | 0.9825 |
| rs3024614  | IL4R   | intron        | 27271846  | 0.009252  | 0.03327 | -0.05595  | 0.07445   | 0.2781  | 0.781    | 0.9761 | 0.4179  | 0.3538  | 1.694    | 0.1931  | 1.311  | 0.8714 | 1.973  | 0.9825 |

|            |       |               |          |           |         |          |          |          |         |         |         |         |          |          |        |        |        |        |
|------------|-------|---------------|----------|-----------|---------|----------|----------|----------|---------|---------|---------|---------|----------|----------|--------|--------|--------|--------|
| rs3024622  | IL4R  | intron        | 27272954 | -0.02995  | 0.03896 | -0.1063  | 0.04641  | -0.7687  | 0.4423  | 0.97555 | 0.1567  | 0.2193  | 2.342    | 0.1259   | 0.6616 | 0.3888 | 1.126  | 0.9825 |
| rs3024632  | IL4R  | intron        | 27274063 | -0.008493 | 0.03289 | -0.07286 | 0.05597  | -0.2582  | 0.7963  | 0.9761  | 0.4776  | 0.4734  | 0.006915 | 0.9337   | 1.017  | 0.6814 | 1.518  | 0.9878 |
| rs3024635  | IL4R  | intron        | 27274370 | 0.07901   | 0.04961 | -0.01823 | 0.1763   | 1.593    | 0.1117  | 0.8922  | 0.1791  | 0.114   | 3.55     | 0.05955  | 1.695  | 0.9748 | 2.948  | 0.9825 |
| rs3024638  | IL4R  | coding        | 27274727 | 0.02361   | 0.07061 | -0.1148  | 0.162    | 0.3344   | 0.7382  | 0.9755  | 0.08209 | 0.06433 | 0.4708   | 0.4926   | 1.301  | 0.6126 | 2.762  | 0.9825 |
| rs3024656  | IL4R  | intron        | 27277110 | -0.01339  | 0.07033 | -0.1512  | 0.1244   | -0.1904  | 0.8491  | 0.9892  | 0.08209 | 0.04706 | 2.196    | 0.1384   | 1.811  | 0.8176 | 4.011  | 0.9825 |
| rs3024675  | IL4R  | intron        | 27280968 | -0.02971  | 0.03952 | -0.1071  | 0.04771  | -0.7522  | 0.4637  | 0.9755  | 0.2687  | 0.2456  | 0.2711   | 0.6026   | 1.128  | 0.7162 | 1.777  | 0.9936 |
| rs3024679  | IL4R  | coding        | 27282571 | 0.03572   | 0.04872 | -0.05978 | 0.1312   | 0.7331   | 0.4637  | 0.9755  | 0.1194  | 0.1374  | 0.2724   | 0.6018   | 0.8511 | 0.4642 | 1.56   | 0.9936 |
| rs2074570  | IL4R  | 3UTR          | 27282658 | -0.02059  | 0.04221 | -0.1033  | 0.06213  | -0.4879  | 0.8258  | 0.9755  | 0.2231  | 0.1746  | 1.448    | 0.2289   | 1.358  | 0.824  | 2.237  | 0.9825 |
| rs8674     | IL4R  | 3UTR          | 27283390 | -0.01851  | 0.03355 | -0.08427 | 0.04725  | -0.5516  | 0.5814  | 0.9755  | 0.3657  | 0.3596  | 0.01513  | 0.9021   | 1.026  | 0.6777 | 1.555  | 0.9936 |
| rs1029489  | IL4R  | flanking_3UTR | 27283718 | -0.01945  | 0.03774 | -0.09343 | 0.05452  | -0.5154  | 0.6065  | 0.9755  | 0.2015  | 0.2382  | 0.7376   | 0.3904   | 0.8069 | 0.4941 | 1.317  | 0.9825 |
| rs13121278 | TRADD | 3UTR          | 65745690 | -0.00111  | 0.04753 | -0.09428 | 0.09206  | -0.02335 | 0.9814  | 0.996   | 0.1418  | 0.152   | 0.07979  | 0.7776   | 0.9214 | 0.5221 | 1.626  | 0.9936 |
| rs1860189  | CCL2  | flanking_5UTR | 29602471 | -0.0453   | 0.05845 | -0.1599  | 0.06926  | -0.775   | 0.4386  | 0.9755  | 0.03731 | 0.09942 | 4.936    | 0.0263   | 0.3511 | 0.1343 | 0.9179 | 0.9936 |
| rs3917878  | CCL2  | flanking_5UTR | 29602968 | 0.03357   | 0.04634 | -0.05725 | 0.1244   | 0.7245   | 0.469   | 0.9755  | 0.0597  | 0.1725  | 10.13    | 0.001458 | 0.3045 | 0.1413 | 0.6562 | 0.9825 |
| rs1024610  | CCL2  | flanking_5UTR | 29604344 | -0.03745  | 0.05927 | -0.1536  | 0.07872  | -0.6318  | 0.5277  | 0.9755  | 0.1343  | 0.07018 | 4.925    | 0.02647  | 2.056  | 1.077  | 3.927  | 0.9825 |
| rs3091332  | CCL2  | flanking_5UTR | 29604933 | 0.01281   | 0.04802 | -0.0813  | 0.1069   | 0.2669   | 0.7897  | 0.9761  | 0.194   | 0.1579  | 0.343    | 0.2769   | 1.504  | 0.7179 | 3.149  | 0.9825 |
| rs3760396  | CCL2  | flanking_5UTR | 29605554 | -0.00432  | 0.06354 | -0.1289  | 0.1202   | -0.068   | 0.9458  | 0.9336  | 0.08955 | 0.0614  | 1.182    | 0.2769   | 1.504  | 0.7179 | 3.149  | 0.9825 |
| rs2857656  | CCL2  | flanking_5UTR | 29606120 | 0.003285  | 0.03446 | -0.06425 | 0.07082  | 0.09534  | 0.9241  | 0.9932  | 0.4403  | 0.3889  | 1.057    | 0.3038   | 1.236  | 0.825  | 1.852  | 0.9825 |
| rs4586     | CCL2  | coding        | 29607382 | -0.00438  | 0.03407 | -0.07117 | 0.0624   | -0.1285  | 0.8978  | 0.9932  | 0.3731  | 0.3353  | 0.6082   | 0.4355   | 1.18   | 0.7783 | 1.789  | 0.9825 |
| rs3917896  | CCL2  | flanking_3UTR | 29610961 | -0.04025  | 0.06159 | -0.161   | 0.08046  | -0.6536  | 0.5136  | 0.9755  | 0.1045  | 0.06725 | 1.861    | 0.1725   | 1.618  | 0.8061 | 3.248  | 0.9825 |
| rs3917900  | CCL2  | flanking_3UTR | 29611427 | -0.05254  | 0.04279 | -0.1091  | 0.05862  | -0.5899  | 0.5554  | 0.9755  | 0.1567  | 0.155   | 0.002235 | 0.9623   | 1.013  | 0.5846 | 1.757  | 0.9985 |
| rs17880431 | STAT3 | intron        | 37723124 | -0.05819  | 0.03415 | -0.1251  | 0.008754 | -1.704   | 0.08888 | 0.8922  | 0.3433  | 0.3099  | 0.4924   | 0.4829   | 1.164  | 0.7617 | 1.778  | 0.9825 |
| rs17881621 | STAT3 | intron        | 37730064 | 0.0178    | 0.05826 | -0.09639 | 0.132    | 0.3056   | 0.76    | 0.9761  | 0.06818 | 0.09649 | 0.9452   | 0.331    | 0.6851 | 0.3185 | 1.474  | 0.9825 |
| rs17881940 | STAT3 | intron        | 37730193 | 0.1085    | 0.06128 | -0.01166 | 0.2286   | 1.77     | 0.07721 | 0.8922  | 0.03731 | 0.09064 | 3.917    | 0.04781  | 0.3888 | 0.1479 | 1.022  | 0.9825 |
| rs17882163 | STAT3 | intron        | 37734696 | -0.0263   | 0.04662 | -0.1177  | 0.06508  | -0.5641  | 0.5728  | 0.9755  | 0.1269  | 0.1345  | 0.935    | 0.825    | 0.935  | 0.5151 | 1.697  | 0.9936 |
| rs17879699 | STAT3 | intron        | 37736929 | -0.05531  | 0.03631 | -0.1245  | 0.0139   | -1.566   | 0.1177  | 0.8922  | 0.3881  | 0.3655  | 0.2098   | 0.6469   | 1.101  | 0.7297 | 1.661  | 0.9936 |
| rs17881762 | STAT3 | intron        | 37745206 | -0.08179  | 0.03952 | -0.1568  | -0.01757 | -2.45    | 0.01434 | 0.8922  | 0.306   | 0.307   | 0.000497 | 0.9822   | 0.9951 | 0.6451 | 1.535  | 0.9985 |
| rs17881519 | STAT3 | intron        | 37753059 | 0.073     | 0.03447 | 0.005447 | 0.1406   | 2.118    | 0.03452 | 0.8922  | 0.2612  | 0.3538  | 3.748    | 0.05288  | 0.6457 | 0.4139 | 1.007  | 0.9825 |
| rs2306581  | STAT3 | intron        | 37753791 | -0.01886  | 0.0402  | -0.09765 | 0.05994  | -0.469   | 0.6392  | 0.9755  | 0.2985  | 0.1871  | 6.994    | 0.008179 | 1.848  | 1.168  | 2.925  | 0.9825 |
| rs17879180 | STAT3 | flanking_5UTR | 37795736 | 0.02261   | 0.03247 | -0.04102 | 0.08624  | 0.6985   | 0.4616  | 0.9755  | 0.4328  | 0.5088  | 0.9247   | 0.1361   | 0.7368 | 0.4929 | 1.102  | 0.9825 |
| rs4969168  | SOC33 | 3UTR          | 73865388 | -0.01156  | 0.03351 | -0.08128 | 0.05008  | -0.4656  | 0.843   | 0.9755  | 0.4545  | 0.4059  | 0.9247   | 0.3363   | 1.22   | 0.8134 | 1.829  | 0.9825 |
| rs11569562 | C3    | intron        | 6629753  | 0.03303   | 0.03261 | -0.03088 | 0.09693  | 1.013    | 0.3115  | 0.961   | 0.5075  | 0.4503  | 1.264    | 0.2608   | 1.258  | 0.843  | 1.877  | 0.9825 |
| rs11569561 | C3    | intron        | 6629871  | -0.01386  | 0.06354 | -0.1384  | 0.1107   | -0.2181  | 0.9274  | 0.9866  | 0.08955 | 0.06725 | 0.7029   | 0.4018   | 1.364  | 0.6584 | 2.827  | 0.9825 |
| rs3444555  | C3    | intron        | 6630360  | -0.05444  | 0.03154 | -0.1865  | 0.01558  | -1.658   | 0.09781 | 0.8922  | 0.1045  | 0.1111  | 0.04354  | 0.8347   | 0.9333 | 0.4881 | 1.785  | 0.9936 |
| rs7951     | C3    | coding        | 6632991  | 0.02306   | 0.05308 | -0.08097 | 0.1271   | 0.4345   | 0.6641  | 0.9755  | 0.08955 | 0.1082  | 0.362    | 0.5474   | 0.8108 | 0.4091 | 1.607  | 0.9825 |
| rs11569550 | C3    | intron        | 6633953  | -0.0515   | 0.03436 | -0.1188  | 0.01584  | -1.499   | 0.1343  | 0.961   | 0.306   | 0.348   | 0.7605   | 0.8632   | 0.8261 | 0.5377 | 1.269  | 0.9825 |
| rs1389623  | C3    | intron        | 6635197  | 0.03377   | 0.03896 | -0.04259 | 0.1101   | 0.8668   | 0.3863  | 0.9921  | 0.2463  | 0.2485  | 0.002659 | 0.9589   | 0.9879 | 0.6216 | 1.57   | 0.9978 |
| rs3444548  | C3    | intron        | 6636817  | 0.02578   | 0.0352  | -0.04322 | 0.09478  | 0.7322   | 0.4643  | 0.9755  | 0.3134  | 0.3176  | 0.007892 | 0.9292   | 0.9807 | 0.6376 | 1.508  | 0.9978 |
| rs2241392  | C3    | intron        | 6636983  | 0.01357   | 0.03277 | -0.05066 | 0.0778   | 0.414    | 0.679   | 0.9755  | 0.2836  | 0.4327  | 0.02136  | 0.8838   | 0.9703 | 0.648  | 1.453  | 0.9936 |
| rs11569536 | C3    | intron        | 6637089  | 0.07181   | 0.06655 | -0.05862 | 0.2022   | 1.079    | 0.2809  | 0.9582  | 0.06716 | 0.7602  | 0.1109   | 0.7391   | 0.8751 | 0.3988 | 1.92   | 0.9936 |
| rs11569535 | C3    | coding        | 6637192  | -0.003224 | 0.05984 | -0.1205  | 0.1141   | -0.05388 | 0.957   | 0.9944  | 0.07463 | 0.09649 | 0.5601   | 0.4542   | 0.7551 | 0.3612 | 1.579  | 0.9825 |
| rs2241391  | C3    | intron        | 6637504  | -0.02938  | 0.0365  | -0.1009  | 0.04215  | -0.8051  | 0.421   | 0.9755  | 0.2836  | 0.2515  | 0.5156   | 0.4727   | 1.178  | 0.7528 | 1.844  | 0.9825 |
| rs237554   | C3    | intron        | 6637659  | -0.03623  | 0.04959 | -0.1334  | 0.06096  | -0.7306  | 0.4653  | 0.9755  | 0.09701 | 0.117   | 0.387    | 0.5339   | 0.8112 | 0.4191 | 1.57   | 0.9825 |
| rs3444544  | C3    | intron        | 6638148  | -0.02614  | 0.05122 | -0.1265  | 0.07425  | -0.5103  | 0.61    | 0.9755  | 0.07463 | 0.1111  | 1.413    | 0.2345   | 0.6452 | 0.3118 | 1.335  | 0.9825 |
| rs344540   | C3    | intron        | 6638768  | -0.01677  | 0.03239 | -0.08026 | 0.04672  | -0.5177  | 0.6048  | 0.9755  | 0.4179  | 0.4357  | 0.1239   | 0.7249   | 0.93   | 0.6206 | 1.393  | 0.9936 |
| rs11569514 | C3    | intron        | 6641276  | 0.01855   | 0.07243 | -0.1234  | 0.1605   | 0.2561   | 0.798   | 0.9761  | 0.02985 | 0.04678 | 0.6858   | 0.4076   | 0.6269 | 0.2057 | 1.911  | 0.9825 |
| rs6417195  | C3    | intron        | 6641461  | -0.00297  | 0.03268 | -0.06703 | 0.06108  | -0.09089 | 0.9276  | 0.9932  | 0.3731  | 0.3706  | 0.002669 | 0.9588   | 1.011  | 0.6686 | 1.529  | 0.9978 |
| rs2320208  | C3    | coding        | 6648436  | 0.01598   | 0.0496  | -0.08124 | 0.1132   | 0.3222   | 0.7474  | 0.9755  | 0.1269  | 0.155   | 0.6063   | 0.4362   | 0.7433 | 0.4405 | 1.425  | 0.9936 |
| rs406514   | C3    | intron        | 6653598  | -0.02517  | 0.03676 | -0.09723 | 0.04688  | -0.6847  | 0.4937  | 0.9755  | 0.2463  | 0.2632  | 0.1433   | 0.705    | 0.9149 | 0.577  | 1.45   | 0.9936 |
| rs11569441 | C3    | intron        | 6656113  | -0.03938  | 0.04377 | -0.1252  | 0.04641  | -0.8997  | 0.3686  | 0.961   | 0.1493  | 0.155   | 0.02424  | 0.8763   | 0.9566 | 0.5474 | 1.672  | 0.9936 |
| rs8112351  | C3    | intron        | 6657298  | 0.05289   | 0.05559 | -0.06607 | 0.1619   | 0.9514   | 0.3417  | 0.961   | 0.08955 | 0.09649 | 0.05416  | 0.816    | 0.4601 | 0.8605 | 1.842  | 0.9936 |
| rs11569438 | C3    | intron        | 6657480  | -0.02166  | 0.05706 | -0.1335  | 0.09017  | -0.3756  | 0.7043  | 0.9755  | 0.1269  | 0.08187 | 2.277    | 0.1313   | 1.629  | 0.4601 | 3.087  | 0.9825 |
| rs10411506 | C3    | intron        | 6661948  | -0.03696  | 0.0529  | -0.1406  | 0.06671  | -0.6988  | 0.4849  | 0.9755  | 0.07463 | 0.1029  | 0.8968   | 0.3436   | 0.7028 | 0.3376 | 1.463  | 0.9825 |
| rs4807895  | C3    | intron        | 6662958  | -0.02681  | 0.04294 | -0.1111  | 0.05736  | -0.6243  | 0.5327  | 0.9755  | 0.1493  | 0.1588  | 0.06682  | 0.796    | 0.9292 | 0.5323 | 1.622  | 0.9936 |
| rs11085197 | C3    | intron        | 6664175  | -0.05611  | 0.05461 | -0.1631  | 0.05093  | -1.027   | 0.3046  | 0.961   | 0.1119  | 0.1257  | 0.1711   | 0.8765   | 0.9292 | 0.4692 | 1.637  | 0.9936 |
| rs11569411 | C3    | intron        | 6669042  | -0.02112  | 0.0472  | -0.1136  | 0.07139  | -0.4474  | 0.6547  | 0.9755  | 0.08955 | 0.1404  | 2.255    | 0.1332   | 0.6025 | 0.3093 | 1.174  | 0.9825 |
| rs2250656  | C3    | intron        | 6669534  | 0.07227   | 0.04214 | -0.01032 | 0.1549   | 1.715    | 0.08676 | 0.8922  | 0.194   | 0.2135  | 0.2204   | 0.6387   | 0.8871 | 0.5379 | 1.463  | 0.9936 |
| rs11569394 | C3    | flanking_5UTR | 6672589  | 0.01059   | 0.05166 | -0.1385  | 0.1596   | 0.1393   | 0.8893  | 0.9332  | 0.05224 | 0.04094 | 0.2917   | 0.5891   | 1.291  | 0.5094 | 3.273  | 0.9936 |
| rs5491     | ICAM1 | coding        | 10246540 | 0.01428   | 0.04136 | -0.06678 | 0.09535  | 0.3453   | 0.7299  | 0.9755  | 0.1567  | 0.2135  | 1.955    | 0.162    | 0.6848 | 0.402  | 1.167  | 0.9825 |

|            |        |               |    |          |           |         |            |          |          |         |        |         |         |          |         |        |        |        |        |
|------------|--------|---------------|----|----------|-----------|---------|------------|----------|----------|---------|--------|---------|---------|----------|---------|--------|--------|--------|--------|
| rs5030362  | ICAM1  | intron        | 19 | 10250562 | 0.04116   | 0.05838 | -0.07327   | 0.1556   | 0.7049   | 0.4811  | 0.8922 | 0.0597  | 0.1082  | 2.644    | 0.1039  | 0.5234 | 0.2371 | 1.155  | 0.9825 |
| rs281432   | ICAM1  | intron        | 19 | 10251658 | -0.0645   | 0.03609 | -0.1352    | 0.00623  | -1.787   | 0.07431 | 0.8922 | 0.3134  | 0.2765  | 0.6418   | 0.423   | 1.195  | 0.7729 | 1.847  | 0.9825 |
| rs5496     | ICAM1  | intron        | 19 | 10256447 | 0.05775   | 0.05619 | -0.05238   | 0.1679   | 1.028    | 0.3044  | 0.961  | 0.0597  | 0.1111  | 2.915    | 0.08777 | 0.5079 | 0.2305 | 1.119  | 0.9825 |
| rs5498     | ICAM1  | coding        | 19 | 10256683 | -0.01628  | 0.04028 | -0.09523   | 0.06266  | -0.4043  | 0.6861  | 0.9755 | 0.2015  | 0.2029  | 0.001249 | 0.9718  | 0.9911 | 0.6023 | 1.631  | 0.9895 |
| rs11086028 | KLF2   | flanking_5UTR | 19 | 16295454 | -0.0665   | 0.03572 | -0.1357    | 0.002725 | -1.883   | 0.06013 | 0.8922 | 0.3657  | 0.3187  | 0.9574   | 0.3279  | 1.232  | 0.8107 | 1.873  | 0.9825 |
| rs4808485  | KLF2   | flanking_3UTR | 19 | 16300498 | -0.01373  | 0.03716 | -0.08656   | 0.05911  | -0.3694  | 0.7119  | 0.9755 | 0.291   | 0.2398  | 0.9237   | 1.302   | 0.8318 | 0.302  | 0.8318 | 0.9825 |
| rs2227347  | F2RL3  | coding        | 19 | 16862240 | 0.04478   | 0.06487 | -0.08237   | 0.1719   | 0.6902   | 0.4903  | 0.9755 | 0.08462 | 0.08434 | 9.34E-05 | 0.9923  | 1.004  | 0.4842 | 2.08   | 0.9895 |
| rs2227356  | F2RL3  | UTR           | 19 | 16864405 | 0.003851  | 0.05089 | -0.0959    | 0.1036   | 0.07588  | 0.9397  | 0.9932 | 0.09701 | 0.1082  | 0.1278   | 0.7207  | 0.8856 | 0.455  | 1.724  | 0.9936 |
| rs2227359  | F2RL3  | flanking_3UTR | 19 | 16866029 | 0.08063   | 0.05486 | -0.02689   | 0.1881   | 1.47     | 0.1421  | 0.9063 | 0.1119  | 0.1023  | 0.09441  | 0.7586  | 1.106  | 0.5825 | 2.099  | 0.9936 |
| rs2227368  | F2RL3  | flanking_3UTR | 19 | 16867947 | 0.07701   | 0.06331 | -0.04706   | 0.2011   | 1.217    | 0.2242  | 0.9444 | 0.05224 | 0.07988 | 1.097    | 0.2949  | 0.6349 | 0.2696 | 1.495  | 0.9825 |
| rs17884196 | NFKB1B | intron        | 19 | 44082771 | -0.0041   | 0.05242 | -0.1068    | 0.09865  | -0.07821 | 0.9377  | 0.9932 | 0.1269  | 0.1118  | 0.2137   | 0.6439  | 1.155  | 0.6272 | 2.126  | 0.9936 |
| rs12979755 | NFKB1B | intron        | 19 | 44083657 | -0.04646  | 0.03235 | -0.1099    | 0.03513  | -1.436   | 0.1513  | 0.923  | 0.4254  | 0.5117  | 2.872    | 0.09016 | 0.7064 | 0.4722 | 1.057  | 0.9825 |
| rs4251938  | PLAUR  | intron        | 19 | 48843461 | -0.02754  | 0.03817 | -0.07427   | 0.04726  | -0.7217  | 0.4707  | 0.9755 | 0.2388  | 0.2324  | 0.02232  | 0.8812  | 1.036  | 0.6477 | 1.659  | 0.9936 |
| rs2302524  | PLAUR  | coding        | 19 | 48848312 | 0.04451   | 0.04146 | -0.03675   | 0.1258   | 1.074    | 0.2834  | 0.9582 | 0.1642  | 0.1959  | 0.6375   | 0.4246  | 0.8062 | 0.4749 | 1.369  | 0.9825 |
| rs2302525  | PLAUR  | intron        | 19 | 48848440 | 0.09295   | 0.04739 | 5.95E+00 5 | 0.1858   | 1.961    | 0.05024 | 0.8922 | 0.1493  | 0.1287  | 0.351    | 1.188   | 0.6713 | 0.6743 | 2.103  | 0.9825 |
| rs4251909  | PLAUR  | intron        | 19 | 48848591 | 0.08444   | 0.0502  | -0.01395   | 0.1828   | 1.682    | 0.09299 | 0.8922 | 0.1493  | 0.1199  | 0.7433   | 0.3886  | 1.288  | 0.7237 | 2.292  | 0.9825 |
| rs4251891  | PLAUR  | intron        | 19 | 48850881 | 0.0175    | 0.05028 | -0.08104   | 0.116    | 0.3481   | 0.7279  | 0.9755 | 0.1045  | 0.1199  | 0.2236   | 0.6363  | 0.8565 | 0.4505 | 1.628  | 0.9936 |
| rs4251883  | PLAUR  | intron        | 19 | 48851659 | 0.02612   | 0.04108 | -0.05439   | 0.1066   | 0.6359   | 0.525   | 0.9755 | 0.2164  | 0.1959  | 0.616    | 1.134   | 0.6943 | 0.6943 | 1.851  | 0.9936 |
| rs4251864  | PLAUR  | intron        | 19 | 48854073 | 0.0147    | 0.0374  | -0.05861   | 0.08801  | 0.3931   | 0.6944  | 0.9755 | 0.2537  | 0.269   | 0.1154   | 0.7341  | 0.9239 | 0.5852 | 1.459  | 0.9936 |
| rs4251863  | PLAUR  | intron        | 19 | 48854137 | -0.01934  | 0.05724 | -0.1315    | 0.09284  | -0.338   | 0.7355  | 0.9755 | 0.07463 | 0.09649 | 0.5601   | 0.4542  | 0.7551 | 0.3612 | 1.579  | 0.9825 |
| rs2239372  | PLAUR  | intron        | 19 | 48854794 | 0.00654   | 0.03431 | -0.0606    | 0.07391  | 0.1939   | 0.8463  | 0.9876 | 0.3358  | 0.3059  | 0.3997   | 0.7491  | 1.147  | 0.7491 | 1.757  | 0.9825 |
| rs4251853  | PLAUR  | intron        | 19 | 48854901 | 0.01377   | 0.03564 | -0.05609   | 0.08363  | 0.3864   | 0.6993  | 0.9755 | 0.3955  | 0.3363  | 1.481    | 0.2237  | 1.292  | 0.8549 | 1.951  | 0.9825 |
| rs397374   | PLAUR  | intron        | 19 | 48855621 | 0.0213    | 0.03712 | -0.05145   | 0.09404  | 0.5738   | 0.9663  | 0.9755 | 0.07463 | 0.09649 | 0.5601   | 0.4542  | 0.7551 | 0.3612 | 1.579  | 0.9825 |
| rs4251854  | PLAUR  | intron        | 19 | 48855834 | 0.01352   | 0.06151 | -0.107     | 0.1341   | 0.2198   | 0.8261  | 0.9755 | 0.09701 | 0.0848  | 0.1787   | 0.6725  | 1.116  | 0.5834 | 1.182  | 0.9825 |
| rs4251853  | PLAUR  | intron        | 19 | 48856045 | -0.04098  | 0.04607 | -0.1313    | 0.04932  | -0.8895  | 0.374   | 0.961  | 0.1269  | 0.1433  | 0.2171   | 0.6413  | 0.8688 | 0.4807 | 1.57   | 0.9936 |
| rs2399374  | PLAUR  | intron        | 19 | 48861362 | -0.02931  | 0.0344  | -0.09673   | 0.0381   | -0.8522  | 0.3944  | 0.961  | 0.403   | 0.4353  | 0.4103   | 0.5218  | 0.8757 | 0.5833 | 1.315  | 0.9825 |
| rs4251831  | PLAUR  | coding        | 19 | 48861578 | 0.08132   | 0.06159 | -0.0394    | 0.202    | 1.32     | 0.1872  | 0.9444 | 0.1194  | 0.08772 | 1.107    | 0.2927  | 1.41   | 0.7416 | 2.681  | 0.9825 |
| rs4251827  | PLAUR  | intron        | 19 | 48862297 | -0.106    | 0.0552  | -0.2142    | 0.002182 | -1.92    | 0.0552  | 0.8922 | 0.0597  | 0.1111  | 2.915    | 0.08777 | 0.5079 | 0.2305 | 1.119  | 0.9825 |
| rs2286960  | PLAUR  | intron        | 19 | 48863865 | 0.000366  | 0.03654 | -0.07125   | 0.07198  | 0.01     | 0.992   | 0.9966 | 0.1866  | 0.2574  | 2.66     | 0.1029  | 0.6617 | 0.402  | 1.089  | 0.9825 |
| rs344782   | PLAUR  | intron        | 19 | 48864730 | 0.01528   | 0.03332 | -0.05002   | 0.08058  | 0.4586   | 0.6466  | 0.9755 | 0.3731  | 0.4532  | 2.518    | 0.1125  | 0.7181 | 0.4767 | 1.082  | 0.9825 |
| rs4251805  | PLAUR  | 5UTR          | 19 | 48866281 | -0.02182  | 0.02939 | -0.1465    | 0.1029   | -0.343   | 0.7317  | 0.9755 | 0.05224 | 0.06433 | 0.2459   | 0.62    | 0.8017 | 0.3342 | 1.923  | 0.9936 |
| rs344781   | PLAUR  | flanking_5UTR | 19 | 48866628 | -0.06939  | 0.06315 | -0.1931    | 0.05438  | -1.099   | 0.3722  | 0.9582 | 0.09701 | 0.07018 | 0.9674   | 0.3253  | 1.424  | 0.7022 | 2.886  | 0.9825 |
| rs24256640 | HNF4A  | intron        | 20 | 42461451 | 0.01378   | 0.03415 | -0.05314   | 0.08071  | 0.4037   | 0.6866  | 0.9755 | 0.4776  | 0.4152  | 1.527    | 0.2165  | 1.288  | 0.8619 | 1.924  | 0.9825 |
| rs2071200  | HNF4A  | intron        | 20 | 42464370 | -0.02234  | 0.03402 | -0.09188   | 0.0472   | -0.6296  | 0.5292  | 0.9755 | 0.3358  | 0.3099  | 0.2977   | 0.5853  | 1.126  | 0.7356 | 1.723  | 0.9936 |
| rs3181206  | HNF4A  | intron        | 20 | 42465269 | -0.03636  | 0.03805 | -0.1109    | 0.03823  | -0.9554  | 0.3397  | 0.961  | 0.2687  | 0.2441  | 0.3078   | 0.579   | 1.137  | 0.7216 | 1.793  | 0.9881 |
| rs3212180  | HNF4A  | intron        | 20 | 42467927 | 0.02269   | 0.04867 | -0.0727    | 0.1181   | 0.4661   | 0.6413  | 0.9755 | 0.1045  | 0.155   | 2.03     | 0.1543  | 0.6362 | 0.3401 | 1.19   | 0.9825 |
| rs745975   | HNF4A  | intron        | 20 | 42468107 | 0.04042   | 0.05504 | -0.06745   | 0.1483   | 0.7343   | 0.463   | 0.9755 | 0.09701 | 0.09649 | 0.000303 | 0.9861  | 1.006  | 0.512  | 1.977  | 0.9895 |
| rs3212184  | HNF4A  | intron        | 20 | 42468574 | 0.03617   | 0.05317 | -0.06805   | 0.1404   | 0.6802   | 0.4966  | 0.9755 | 0.1269  | 0.117   | 0.08964  | 0.7646  | 1.097  | 0.5983 | 2.011  | 0.9936 |
| rs6017340  | HNF4A  | intron        | 20 | 42471622 | -0.03079  | 0.03208 | -0.09366   | 0.03208  | -0.9598  | 0.3375  | 0.961  | 0.3955  | 0.4825  | 2.931    | 0.08689 | 0.7019 | 0.4677 | 1.053  | 0.9825 |
| rs6073432  | HNF4A  | intron        | 20 | 42474329 | 0.00318   | 0.03515 | -0.06571   | 0.07207  | 0.09047  | 0.9279  | 0.9932 | 0.291   | 0.3041  | 0.078    | 0.78    | 0.9395 | 0.6061 | 1.456  | 0.9936 |
| rs3212198  | HNF4A  | intron        | 20 | 42479459 | 0.0207    | 0.03384 | -0.04562   | 0.08703  | 0.6118   | 0.5409  | 0.9755 | 0.3955  | 0.4298  | 0.485    | 0.4953  | 0.868  | 0.5777 | 1.304  | 0.9825 |
| rs3212199  | HNF4A  | intron        | 20 | 42479459 | -0.01664  | 0.0343  | -0.08386   | 0.05058  | -0.4851  | 0.8177  | 0.9755 | 0.1489  | 0.5059  | 0.03145  | 0.1037  | 0.695  | 0.6677 | 1.547  | 0.9936 |
| rs3818247  | HNF4A  | intron        | 20 | 42490894 | -0.00706  | 0.0338  | -0.07396   | 0.05855  | -0.228   | 0.6297  | 0.9844 | 0.4848  | 0.4853  | 7.56E-05 | 0.9931  | 0.9982 | 0.6677 | 1.492  | 0.9936 |
| rs3746574  | HNF4A  | intron        | 20 | 42491432 | 0.00421   | 0.03443 | -0.06326   | 0.07168  | 0.1223   | 0.9027  | 0.9932 | 0.3582  | 0.3801  | 0.1974   | 0.6568  | 0.9102 | 0.6009 | 1.379  | 0.9936 |
| rs11086926 | HNF4A  | 3UTR          | 20 | 42492111 | 0.07612   | 0.03722 | 0.003159   | 0.1491   | 2.045    | 0.04124 | 0.8922 | 0.2612  | 0.2544  | 0.02341  | 0.8784  | 1.036  | 0.6569 | 1.635  | 0.9936 |
| rs3918241  | MMP9   | flanking_5UTR | 20 | 44069142 | -0.02233  | 0.04479 | -0.1162    | 0.07155  | -0.4661  | 0.6413  | 0.9755 | 0.1716  | 0.152   | 0.2785   | 0.5977  | 1.156  | 0.6752 | 1.978  | 0.9936 |
| rs3918245  | MMP9   | coding        | 20 | 44070317 | 0.03857   | 0.0399  | -0.03964   | 0.1168   | 0.9666   | 0.3341  | 0.961  | 0.2239  | 0.2865  | 1.923    | 0.1655  | 0.7182 | 0.4493 | 1.148  | 0.9825 |
| rs3918248  | MMP9   | intron        | 20 | 44073632 | -0.01113  | 0.03446 | -0.07868   | 0.05641  | -0.3231  | 0.7467  | 0.9755 | 0.3284  | 0.3509  | 0.2162   | 0.642   | 0.9044 | 0.5922 | 1.381  | 0.9936 |
| rs2250889  | MMP9   | coding        | 20 | 44073798 | -0.005234 | 0.03751 | -0.148     | 0.1375   | -0.07187 | 0.9427  | 0.9932 | 0.02985 | 0.04094 | 0.3251   | 0.5685  | 0.7209 | 0.233  | 2.231  | 0.9825 |
| rs3918262  | MMP9   | coding        | 20 | 44075813 | 0.001805  | 0.04702 | -0.09036   | 0.09397  | 0.03838  | 0.9694  | 0.9444 | 0.1045  | 0.1287  | 0.526    | 0.4683  | 0.7902 | 0.4176 | 1.495  | 0.9825 |
| rs3918262  | MMP9   | coding        | 20 | 44076518 | -0.02618  | 0.04174 | -0.108     | 0.05563  | -0.6272  | 0.5307  | 0.9755 | 0.2313  | 0.2047  | 0.4095   | 0.5222  | 1.169  | 0.7238 | 1.89   | 0.9825 |
| rs20544    | MMP9   | 3UTR          | 20 | 44077177 | 0.007371  | 0.06081 | -0.1118    | 0.1266   | 0.1212   | 0.9036  | 0.9932 | 0.0597  | 0.08187 | 0.6769   | 0.4107  | 1.316  | 0.316  | 1.605  | 0.9825 |
| rs9509     | MMP9   | 3UTR          | 20 | 44078417 | -0.03647  | 0.03819 | -0.1113    | 0.03839  | -0.9548  | 0.34    | 0.961  | 0.3582  | 0.2427  | 6.441    | 0.01115 | 1.742  | 1.132  | 2.68   | 0.9825 |
| rs4253445  | CEBPB  | flanking_3UTR | 20 | 44078560 | 0.01903   | 0.03998 | -0.05932   | 0.09739  | 0.4761   | 0.6342  | 0.9755 | 0.194   | 0.2485  | 1.594    | 0.2067  | 0.728  | 0.4441 | 1.93   | 0.9825 |
| rs17883772 | SOD1   | intron        | 21 | 31954872 | -0.01417  | 0.05285 | -0.1178    | 0.08942  | -0.2682  | 0.7886  | 0.9761 | 0.1269  | 0.1374  | 0.09228  | 0.7613  | 0.912  | 0.5032 | 1.422  | 0.9936 |

|            |       |               |    |           |           |         |          |          |          |         |        |         |         |          |         |        |         |       |        |
|------------|-------|---------------|----|-----------|-----------|---------|----------|----------|----------|---------|--------|---------|---------|----------|---------|--------|---------|-------|--------|
| rs17878802 | SOD1  | intron        | 21 | 319556974 | -0.01282  | 0.06138 | -0.1331  | 0.1075   | -0.2069  | 0.8346  | 0.9856 | 0.07463 | 0.06725 | 0.08117  | 0.7757  | 1.119  | 0.5175  | 2.418 | 0.9936 |
| rs17880988 | SOD1  | intron        | 21 | 31956763  | -0.01107  | 0.03395 | -0.07762 | 0.05547  | -0.3261  | 0.7444  | 0.9755 | 0.3582  | 0.3655  | 0.0221   | 0.8818  | 0.9689 | 0.6391  | 1.469 | 0.9936 |
| rs17880980 | SOD1  | intron        | 21 | 31959435  | -0.1006   | 0.05435 | -0.2071  | 0.005961 | -1.85    | 0.06469 | 0.8922 | 0.09701 | 0.08772 | 0.1012   | 0.7504  | 1.117  | 0.5639  | 2.214 | 0.9936 |
| rs17883444 | SOD1  | intron        | 21 | 31961191  | -0.03832  | 0.04348 | -0.1235  | 0.0469   | -0.8812  | 0.3785  | 0.961  | 0.1742  | 0.2047  | 0.5594   | 0.4545  | 0.8199 | 0.4871  | 1.38  | 0.9825 |
| rs17883234 | SOD1  | intron        | 21 | 31961875  | 0.06266   | 0.05755 | -0.05013 | 0.1755   | 1.089    | 0.2766  | 0.9582 | 0.09701 | 0.07602 | 0.564    | 0.4527  | 1.306  | 0.6498  | 2.624 | 0.9825 |
| rs36086171 | MIF   | flanking_5UTR | 22 | 22565455  | -0.002663 | 0.0439  | -0.08871 | 0.08339  | -0.06065 | 0.9517  | 0.9944 | 0.1194  | 0.1696  | 0.847    | 0.1741  | 0.6639 | 0.3667  | 1.202 | 0.9825 |
| rs755622   | MIF   | flanking_5UTR | 22 | 22566392  | -0.03141  | 0.03355 | -0.09716 | 0.03434  | -0.9363  | 0.3494  | 0.961  | 0.3731  | 0.3713  | 0.00132  | 0.971   | 1.008  | 0.6667  | 1.523 | 0.9985 |
| rs2070767  | MIF   | flanking_3UTR | 22 | 22567463  | -0.001235 | 0.03832 | -0.07633 | 0.07386  | -0.03223 | 0.9743  | 0.9944 | 0.1866  | 0.2164  | 0.5193   | 0.4711  | 0.8306 | 0.5012  | 1.377 | 0.9825 |
| rs2000466  | MIF   | flanking_3UTR | 22 | 22567862  | 0.06344   | 0.0376  | -0.1371  | 0.1027   | -1.687   | 0.09206 | 0.9922 | 0.2761  | 0.2339  | 0.9249   | 0.3362  | 1.249  | 0.7934  | 1.967 | 0.9825 |
| rs17878600 | HMOX1 | flanking_5UTR | 22 | 34099430  | 0.04277   | 0.036   | -0.02778 | 0.1133   | 1.188    | 0.2352  | 0.9444 | 0.3507  | 0.307   | 0.847    | 0.3574  | 1.219  | 0.799   | 1.861 | 0.9825 |
| rs17886049 | HMOX1 | intron        | 22 | 34102172  | -0.004201 | 0.03438 | -0.07158 | 0.06318  | -0.1222  | 0.9028  | 0.9932 | 0.3657  | 0.3743  | 0.03047  | 0.8614  | 0.9638 | 0.6369  | 1.458 | 0.9936 |
| rs2071749  | HMOX1 | intron        | 22 | 34107967  | 0.0141    | 0.05196 | -0.08774 | 0.1159   | 0.2713   | 0.7862  | 0.9761 | 0.1119  | 0.114   | 0.004201 | 0.9483  | 0.9793 | 0.5205  | 1.843 | 0.9978 |
| rs17885185 | HMOX1 | intron        | 22 | 34108330  | -0.1267   | 0.07109 | -0.266   | 0.01265  | -1.782   | 0.07516 | 0.9932 | 0.01493 | 0.04094 | 2.005    | 0.1568  | 0.355  | 0.07958 | 1.583 | 0.9825 |
| rs9622194  | HMOX1 | intron        | 22 | 34111517  | 0.004844  | 0.03456 | -0.0629  | 0.07259  | 0.1402   | 0.8886  | 0.9932 | 0.3731  | 0.3538  | 0.1563   | 0.6926  | 1.087  | 0.7164  | 1.645 | 0.9936 |
| rs595098   | HMOX1 | intron        | 22 | 34111721  | -0.000509 | 0.03891 | -0.07678 | 0.07576  | -0.01307 | 0.9896  | 0.9966 | 0.194   | 0.2324  | 0.8186   | 0.3656  | 0.7954 | 0.484   | 1.307 | 0.9825 |
| rs17879828 | HMOX1 | 3UTR          | 22 | 34114423  | 0.000258  | 0.03647 | -0.07122 | 0.07173  | 0.007062 | 0.9944  | 0.9966 | 0.2463  | 0.2836  | 0.6768   | 0.4107  | 0.8253 | 0.522   | 1.305 | 0.9825 |
| rs17880288 | HMOX1 | flanking_3UTR | 22 | 34114877  | 0.02945   | 0.07046 | -0.1087  | 0.1676   | 0.4179   | 0.6762  | 0.9755 | 0.05224 | 0.08187 | 1.241    | 0.2653  | 0.6181 | 0.2633  | 1.451 | 0.9825 |
| rs17885647 | HMOX1 | flanking_3UTR | 22 | 34115662  | -0.05078  | 0.06036 | -0.1691  | 0.06753  | -0.8412  | 0.4005  | 0.961  | 0.1045  | 0.05556 | 3.571    | 0.05879 | 1.983  | 0.964   | 4.081 | 0.9825 |
| rs17883419 | HMOX1 | flanking_3UTR | 22 | 34116525  | 0.01717   | 0.05314 | -0.08699 | 0.1213   | 0.3231   | 0.7468  | 0.9755 | 0.1045  | 0.1071  | 0.007158 | 0.9326  | 0.9722 | 0.5062  | 1.867 | 0.9978 |
| rs4253617  | PPARA | intron        | 22 | 44869119  | 0.003547  | 0.04022 | -0.07529 | 0.08238  | 0.08818  | 0.9298  | 0.9932 | 0.194   | 0.2339  | 0.885    | 0.3468  | 0.7884 | 0.4801  | 1.295 | 0.9825 |
| rs4253623  | PPARA | intron        | 22 | 44870625  | 0.09955   | 0.06673 | -0.03125 | 0.2303   | 1.492    | 0.1362  | 0.8922 | 0.04478 | 0.07895 | 1.742    | 0.1868  | 0.5469 | 0.2205  | 1.356 | 0.9825 |
| rs4253649  | PPARA | intron        | 22 | 44885147  | -0.06773  | 0.03972 | -0.1456  | 0.01011  | -1.705   | 0.08857 | 0.8922 | 0.2313  | 0.2251  | 0.02108  | 0.8846  | 1.036  | 0.6442  | 1.666 | 0.9936 |
| rs4253653  | PPARA | intron        | 22 | 44889421  | 0.05394   | 0.05018 | -0.04441 | 0.1523   | 1.075    | 0.2828  | 0.9582 | 0.1119  | 0.117   | 0.02373  | 0.8776  | 0.9517 | 0.5068  | 1.787 | 0.9936 |
| rs4253701  | PPARA | intron        | 22 | 44906629  | 0.01242   | 0.03652 | -0.05915 | 0.08399  | 0.3401   | 0.7339  | 0.9755 | 0.2463  | 0.2924  | 1.018    | 0.3131  | 0.7907 | 0.5007  | 1.249 | 0.9825 |
| rs4253712  | PPARA | intron        | 22 | 44915554  | -0.0018   | 0.03516 | -0.0707  | 0.0671   | -0.05121 | 0.9592  | 0.9944 | 0.3134  | 0.3509  | 0.6013   | 0.4381  | 0.8446 | 0.5509  | 1.295 | 0.9825 |
| rs4253728  | PPARA | intron        | 22 | 44930586  | 0.01345   | 0.05831 | -0.1008  | 0.1277   | 0.2306   | 0.8177  | 0.9844 | 0.08955 | 0.08772 | 0.004021 | 0.9494  | 1.023  | 0.5073  | 2.063 | 0.9978 |
| rs4253729  | PPARA | intron        | 22 | 44930752  | -0.005818 | 0.04488 | -0.09379 | 0.08215  | -0.1296  | 0.8969  | 0.9932 | 0.1515  | 0.1441  | 0.04169  | 0.8382  | 1.06   | 0.6034  | 1.864 | 0.9936 |
| rs4253753  | PPARA | intron        | 22 | 44934912  | 0.01554   | 0.06667 | -0.1151  | 0.1462   | 0.2331   | 0.8158  | 0.9844 | 0.08209 | 0.06725 | 0.3196   | 0.5719  | 1.24   | 0.5871  | 2.621 | 0.9825 |
| rs4253754  | PPARA | intron        | 22 | 44936663  | 0.02155   | 0.04775 | -0.07204 | 0.1151   | 0.4513   | 0.6519  | 0.9755 | 0.1343  | 0.1345  | 2.52E-05 | 0.996   | 0.9985 | 0.5559  | 1.794 | 0.9985 |
| rs4253757  | PPARA | 3UTR          | 22 | 44936636  | -0.04942  | 0.04182 | -0.1314  | 0.03255  | -1.182   | 0.2377  | 0.9444 | 0.1567  | 0.1667  | 0.06957  | 0.792   | 0.9292 | 0.5384  | 1.604 | 0.9936 |
| rs4253760  | PPARA | intron        | 22 | 44942903  | -0.003511 | 0.03449 | -0.07111 | 0.06408  | -0.1018  | 0.9189  | 0.9932 | 0.3806  | 0.3542  | 0.2899   | 0.5903  | 1.12   | 0.7405  | 1.696 | 0.9936 |
| rs4253765  | PPARA | intron        | 22 | 44943407  | -0.004836 | 0.03262 | -0.06878 | 0.05911  | -0.1482  | 0.8822  | 0.9932 | 0.5299  | 0.4882  | 0.6658   | 0.4145  | 1.181  | 0.7916  | 1.763 | 0.9825 |
| rs4253776  | PPARA | intron        | 22 | 44949698  | 0.003582  | 0.03348 | -0.06203 | 0.06919  | 0.107    | 0.9148  | 0.9932 | 0.3881  | 0.4206  | 0.42     | 0.5169  | 0.8736 | 0.5805  | 1.315 | 0.9825 |
